# Supplementary material for: Novel Acylselenourea Derivatives: Dual Molecules with Anticancer and Radical Scavenging Activity
Source: MDPI journal article supplement (doi:10.3390/antiox12071331), 2023-06-23
Supplement: s1 [file s1]

# Novel Acylselenourea Derivatives: Dual Molecules with Anticancer and Radical Scavenging Activity

Nora Astrain-Redin <sup>1,2</sup>, Asif Raza <sup>2</sup>, Ignacio Encío <sup>3,4</sup>, Arun K. Sharma <sup>2</sup>, Daniel Plano <sup>1,3,\*</sup> and Carmen Sanmartín <sup>1,3,\*</sup>

- <sup>1</sup> Departamento de Tecnología y Química Farmacéuticas, Universidad de Navarra, Irunlarrea 1, E-31008 Pamplona, Spain; nastrain@alumni.unav.es (N.A.-R.); dplano@unav.es (D.P.)
- <sup>2</sup> Department of Pharmacology, Penn State Cancer Institute, CH72, Penn State College of Medicine, 500 University Drive, Hershey, PA 17033, USA; asharma1@pennstatehealth.psu.edu (A.K.S.); mrza@pennstatehealth.psu.edu (A.R.)
- <sup>3</sup> Instituto de Investigación Sanitaria de Navarra (IdiSNA), Irunlarrea, 3, 31008, Pamplona, Spain; ignacio.encio@unavarra.es
- <sup>4</sup> Departamento de Ciencias de la Salud, Universidad Pública de Navarra, Avda. Barañain s/n, 31008, Pamplona, Spain
- \* Correspondence: dplano@unav.es (D.P.); sanmartin@unav.es (C.S.)

## Table of Contents

| Biological evaluation                                                   |                             |
|-------------------------------------------------------------------------|-----------------------------|
| Cytotoxicity screening                                                  | Table S1                    |
| DPPH radical scavenging assay                                           | Tables S2-S3<br>Figure S100 |
| H <sub>2</sub> O <sub>2</sub> -induced oxidative damage in DU-145 cells | Tables S4-S5                |
| X-ray crystallography data                                              | Tables S6-S7                |
| Spectroscopic characterization                                          |                             |
| <sup>1</sup> H, <sup>13</sup> C and <sup>77</sup> Se NMR spectra        | Figures S1-S99              |

**Table S1.** Cell growth % for the compounds **1.I-6.I**, **1.II-11.II**, and **1.III-8.III** in HTB-54, DU-145, HT-29, and MDA-MB-231.

|              | 10 $\mu$ M        |                  |                  |                   | 50 $\mu$ M        |                  |                 |                  |
|--------------|-------------------|------------------|------------------|-------------------|-------------------|------------------|-----------------|------------------|
|              | Cancer cell lines |                  |                  |                   | Cancer cell lines |                  |                 |                  |
|              | HTB-54            | MDA-MB-231       | DU-145           | HT-29             | HTB-54            | MDA-MB-231       | DU-145          | HT-29            |
| <b>1.I</b>   | 47.09 $\pm$ 14.8  | 46.68 $\pm$ 5.6  | 44.88 $\pm$ 4.8  | 44.17 $\pm$ 7.1   | 31.65 $\pm$ 8.2   | 37.96 $\pm$ 7.8  | 48.73 $\pm$ 3.1 | 25.53 $\pm$ 4.2  |
| <b>2.I</b>   | 92.29 $\pm$ 6.2   | 32.83 $\pm$ 7.2  | 54.53 $\pm$ 8.4  | 48.43 $\pm$ 13.8  | 71.81 $\pm$ 4.4   | 15.23 $\pm$ 8.8  | 50.20 $\pm$ 2.0 | 32.69 $\pm$ 6.9  |
| <b>5.I</b>   | 36.79 $\pm$ 8.6   | 44.99 $\pm$ 12.5 | 42.43 $\pm$ 4.9  | 39.59 $\pm$ 14.3  | 27.54 $\pm$ 6.5   | 21.29 $\pm$ 11.2 | 47.87 $\pm$ 3.9 | 21.39 $\pm$ 1.5  |
| <b>6.I</b>   | 84.63 $\pm$ 5.9   | 88.36 $\pm$ 16.3 | 19.47 $\pm$ 2.0  | 60.43 $\pm$ 9.7   | 36.21 $\pm$ 5.7   | 23.48 $\pm$ 12.9 | 12.57 $\pm$ 1.0 | 25.13 $\pm$ 5.0  |
| <b>1.II</b>  | 54.85 $\pm$ 11.2  | 80.43 $\pm$ 8.4  | 81.50 $\pm$ 13.5 | 94.99 $\pm$ 15.7  | 11.10 $\pm$ 5.2   | 14.52 $\pm$ 7.9  | 10.56 $\pm$ 5.7 | 16.65 $\pm$ 5.3  |
| <b>2.II</b>  | 35.85 $\pm$ 12.1  | 79.94 $\pm$ 9.6  | 63.36 $\pm$ 5.6  | 107.24 $\pm$ 16.2 | 8.52 $\pm$ 4.8    | 11.07 $\pm$ 5.9  | 7.33 $\pm$ 4.6  | 26.20 $\pm$ 5.1  |
| <b>3.II</b>  | 73.12 $\pm$ 3.0   | 79.59 $\pm$ 7.7  | 93.62 $\pm$ 14.7 | 63.26 $\pm$ 15.0  | 35.35 $\pm$ 8.9   | 14.06 $\pm$ 5.8  | 10.43 $\pm$ 4.1 | 33.21 $\pm$ 6.1  |
| <b>4.II</b>  | 79.19 $\pm$ 9.2   | 81.12 $\pm$ 6.7  | 67.23 $\pm$ 7.1  | 100.1 $\pm$ 7.1   | 44.16 $\pm$ 6.2   | 17.63 $\pm$ 6.6  | 13.79 $\pm$ 1.2 | 32.90 $\pm$ 5.0  |
| <b>5.II</b>  | 67.61 $\pm$ 14.9  | 80.43 $\pm$ 8.4  | 97.48 $\pm$ 18.5 | 100.18 $\pm$ 16.6 | 16.85 $\pm$ 4.1   | 15.62 $\pm$ 6.0  | 10.34 $\pm$ 4.9 | 23.85 $\pm$ 5.0  |
| <b>6.II</b>  | 68.67 $\pm$ 8.2   | 51.81 $\pm$ 6.8  | 57.30 $\pm$ 3.6  | 94.72 $\pm$ 5.3   | 44.07 $\pm$ 10.6  | 30.48 $\pm$ 7.1  | 14.56 $\pm$ 4.5 | 56.07 $\pm$ 11.0 |
| <b>7.II</b>  | 21.44 $\pm$ 8.2   | 33.91 $\pm$ 6.7  | 50.65 $\pm$ 2.4  | 110.11 $\pm$ 19.4 | 10.17 $\pm$ 5.8   | 10.52 $\pm$ 7.0  | 8.95 $\pm$ 4.9  | 19.04 $\pm$ 3.6  |
| <b>8.II</b>  | 51.86 $\pm$ 15.0  | 80.71 $\pm$ 6.4  | 88.61 $\pm$ 10.1 | 83.51 $\pm$ 16.4  | 20.03 $\pm$ 6.6   | 15.52 $\pm$ 7.6  | 10.28 $\pm$ 4.2 | 26.64 $\pm$ 3.8  |
| <b>9.II</b>  | 82.80 $\pm$ 2.8   | 83.75 $\pm$ 7.9  | 110.12 $\pm$ 9.0 | 112.94 $\pm$ 7.8  | 60.04 $\pm$ 4.5   | 71.33 $\pm$ 5.3  | 69.57 $\pm$ 6.1 | 102.91 $\pm$ 7.1 |
| <b>10.II</b> | 52.59 $\pm$ 10.5  | 24.81 $\pm$ 6.1  | 18.15 $\pm$ 2.7  | 47.75 $\pm$ 8.7   | 43.50 $\pm$ 17.6  | 21.00 $\pm$ 9.4  | 18.79 $\pm$ 3.1 | 46.40 $\pm$ 4.8  |
| <b>11.II</b> | 48.26 $\pm$ 6.9   | 77.12 $\pm$ 10.1 | 93.85 $\pm$ 8.0  | 88.11 $\pm$ 4.8   | 5.94 $\pm$ 4.7    | 14.69 $\pm$ 7.8  | 22.01 $\pm$ 5.8 | 30.82 $\pm$ 4.0  |
| <b>1.III</b> | 76.00 $\pm$ 4.8   | 66.33 $\pm$ 16.7 | 42.41 $\pm$ 4.8  | 83.98 $\pm$ 16.8  | 48.02 $\pm$ 4.2   | 17.56 $\pm$ 9.3  | 15.17 $\pm$ 1.2 | 17.23 $\pm$ 4.2  |
| <b>2.III</b> | 76.75 $\pm$ 6.8   | 27.43 $\pm$ 5.4  | 12.75 $\pm$ 2.8  | 43.42 $\pm$ 4.2   | 44.74 $\pm$ 3.5   | 9.48 $\pm$ 7.8   | 14.30 $\pm$ 6.7 | 20.61 $\pm$ 4.0  |
| <b>3.III</b> | 74.23 $\pm$ 4.0   | 66.84 $\pm$ 7.2  | 86.45 $\pm$ 9.3  | 94.82 $\pm$ 17.6  | 35.29 $\pm$ 5.7   | 20.11 $\pm$ 8.0  | 24.70 $\pm$ 4.9 | 51.37 $\pm$ 6.0  |
| <b>5.III</b> | 76.00 $\pm$ 4.8   | 78.45 $\pm$ 12.0 | 80.81 $\pm$ 7.4  | 70.03 $\pm$ 8.7   | 33.41 $\pm$ 8.6   | 33.28 $\pm$ 6.5  | 26.27 $\pm$ 6.5 | 33.88 $\pm$ 4.5  |
| <b>8.III</b> | 34.54 $\pm$ 9.1   | 61.89 $\pm$ 13.5 | 63.05 $\pm$ 4.8  | 40.26 $\pm$ 8.3   | 31.63 $\pm$ 6.1   | 19.15 $\pm$ 9.6  | 12.27 $\pm$ 7.8 | 18.08 $\pm$ 5.3  |

The cell growth % is presented as the mean  $\pm$  SD of three independent experiments performed in triplicates

**Table S2.** DPPH radical scavenging activity (%) for the compounds **1.I-6.I**, **1.II-11.II**, and **1.III-8.III** at 0.03 mg/mL in the time range of 0, 5, 15, 30, 60, 90, and 120 minutes.

| 0.03 mg/mL       |                | DPPH scavenging activity (%) |                |                |                |                |                |  |
|------------------|----------------|------------------------------|----------------|----------------|----------------|----------------|----------------|--|
| Compd.           | 0 min          | 5 min                        | 15 min         | 30 min         | 60 min         | 90 min         | 120 min        |  |
| <b>Asc. Acid</b> | 96.4 $\pm$ 0.2 | 96.4 $\pm$ 0.1               | 96.9 $\pm$ 0.5 | 96.9 $\pm$ 0.5 | 96.6 $\pm$ 0.1 | 96.6 $\pm$ 0.1 | 96.6 $\pm$ 0.1 |  |
| <b>Trolox</b>    | 90.8 $\pm$ 2.3 | 96.3 $\pm$ 0.1               | 96.3 $\pm$ 0.2 | 96.3 $\pm$ 0.2 | 96.2 $\pm$ 0.2 | 96.2 $\pm$ 0.2 | 96.2 $\pm$ 0.2 |  |
| <b>1.I</b>       | 1.8 $\pm$ 1.5  | 10.3 $\pm$ 4.3               | 29.7 $\pm$ 4.1 | 55.4 $\pm$ 5.1 | 95.4 $\pm$ 4.1 | 96.5 $\pm$ 0.7 | 96.4 $\pm$ 0.6 |  |
| <b>2.I</b>       | 2.5 $\pm$ 0.6  | 12.8 $\pm$ 1.8               | 36.2 $\pm$ 0.1 | 59.0 $\pm$ 3.0 | 90.7 $\pm$ 5.7 | 95.5 $\pm$ 0.2 | 95.5 $\pm$ 0.3 |  |
| <b>5.I</b>       | 3.2 $\pm$ 2.4  | 16.6 $\pm$ 3.1               | 29.8 $\pm$ 3.4 | 46.1 $\pm$ 3.9 | 72.6 $\pm$ 6.2 | 97.7 $\pm$ 0.6 | 96.7 $\pm$ 2.5 |  |
| <b>6.I</b>       | 2.3 $\pm$ 1.0  | 10.1 $\pm$ 1.1               | 15.4 $\pm$ 1.3 | 21.8 $\pm$ 1.1 | 35.1 $\pm$ 1.2 | 50.2 $\pm$ 0.8 | 66.4 $\pm$ 0.2 |  |
| <b>1.II</b>      | 16.0 $\pm$ 1.9 | 45.2 $\pm$ 5.1               | 65.4 $\pm$ 4.1 | 85.4 $\pm$ 4.9 | 96.5 $\pm$ 0.6 | 96.6 $\pm$ 0.6 | 96.5 $\pm$ 0.5 |  |
| <b>2.II</b>      | 24.4 $\pm$ 3.0 | 60.7 $\pm$ 2.5               | 75.8 $\pm$ 3.5 | 87.6 $\pm$ 4.0 | 96.7 $\pm$ 0.7 | 97.3 $\pm$ 0.8 | 97.3 $\pm$ 0.8 |  |
| <b>3.II</b>      | 0.7 $\pm$ 2.7  | 5.2 $\pm$ 1.8                | 9.0 $\pm$ 1.6  | 14.3 $\pm$ 1.1 | 23.7 $\pm$ 0.8 | 31.7 $\pm$ 0.1 | 39.6 $\pm$ 0.1 |  |
| <b>4.II</b>      | 0.9 $\pm$ 2.8  | 6.1 $\pm$ 1.7                | 9.9 $\pm$ 1.5  | 15.5 $\pm$ 1.4 | 25.6 $\pm$ 1.3 | 35.0 $\pm$ 0.6 | 44.3 $\pm$ 0.6 |  |
| <b>5.II</b>      | 13.5 $\pm$ 1.3 | 42.4 $\pm$ 1.5               | 62.7 $\pm$ 0.8 | 80.2 $\pm$ 1.1 | 97.2 $\pm$ 0.7 | 97.4 $\pm$ 0.8 | 97.7 $\pm$ 1.0 |  |
| <b>6.II</b>      | 0.0 $\pm$ 1.7  | 1.0 $\pm$ 1.7                | 4.6 $\pm$ 1.3  | 9.8 $\pm$ 1.1  | 18.8 $\pm$ 0.9 | 26.7 $\pm$ 0.6 | 34.2 $\pm$ 0.7 |  |
| <b>7.II</b>      | 56.3 $\pm$ 6.2 | 90.0 $\pm$ 1.3               | 95.7 $\pm$ 0.4 | 96.2 $\pm$ 0.2 | 96.2 $\pm$ 0.2 | 96.2 $\pm$ 0.2 | 96.2 $\pm$ 0.2 |  |
| <b>8.II</b>      | 17.6 $\pm$ 4.6 | 39.0 $\pm$ 3.0               | 55.5 $\pm$ 2.1 | 68.0 $\pm$ 1.7 | 81.4 $\pm$ 1.3 | 88.2 $\pm$ 1.3 | 93.7 $\pm$ 1.4 |  |
| <b>9.II</b>      | 1.9 $\pm$ 1.9  | 6.1 $\pm$ 1.7                | 10.1 $\pm$ 1.2 | 14.7 $\pm$ 1.1 | 22.3 $\pm$ 1.2 | 29.0 $\pm$ 1.2 | 35.2 $\pm$ 1.3 |  |
| <b>10.II</b>     | 31.6 $\pm$ 4.1 | 69.1 $\pm$ 0.1               | 86.3 $\pm$ 0.9 | 94.4 $\pm$ 0.7 | 96.1 $\pm$ 0.1 | 96.0 $\pm$ 0.2 | 96.0 $\pm$ 0.3 |  |
| <b>11.II</b>     | 11.0 $\pm$ 3.0 | 38.5 $\pm$ 0.3               | 56.8 $\pm$ 0.6 | 70.1 $\pm$ 1.0 | 83.0 $\pm$ 1.0 | 89.6 $\pm$ 1.2 | 94.3 $\pm$ 1.2 |  |
| <b>1.III</b>     | 11.8 $\pm$ 1.7 | 15.2 $\pm$ 4.4               | 23.5 $\pm$ 3.9 | 31.2 $\pm$ 3.7 | 40.9 $\pm$ 4.3 | 42.6 $\pm$ 0.6 | 48.1 $\pm$ 0.4 |  |
| <b>2.III</b>     | 14.5 $\pm$ 2.3 | 12.8 $\pm$ 3.0               | 19.8 $\pm$ 2.8 | 24.8 $\pm$ 2.6 | 30.2 $\pm$ 2.9 | 33.0 $\pm$ 3.1 | 34.4 $\pm$ 2.9 |  |
| <b>3.III</b>     | 2.6 $\pm$ 1.3  | 6.3 $\pm$ 1.1                | 10.9 $\pm$ 0.9 | 17.5 $\pm$ 0.4 | 28.4 $\pm$ 0.4 | 37.1 $\pm$ 0.3 | 45.9 $\pm$ 0.6 |  |
| <b>5.III</b>     | 9.3 $\pm$ 1.0  | 9.8 $\pm$ 0.3                | 23.0 $\pm$ 0.3 | 34.0 $\pm$ 0.6 | 46.6 $\pm$ 0.9 | 54.6 $\pm$ 0.8 | 60.2 $\pm$ 0.7 |  |
| <b>8.III</b>     | 6.4 $\pm$ 2.5  | 17.9 $\pm$ 0.9               | 32.8 $\pm$ 0.9 | 45.2 $\pm$ 2.0 | 59.7 $\pm$ 3.8 | 62.4 $\pm$ 3.1 | 72.5 $\pm$ 8.1 |  |

The percentage of inhibition of DPPH is presented as the mean  $\pm$  SEM of three independent experiments performed in triplicates.

**Table S3.** DPPH radical scavenging activity (%) for the compounds **1.I-6.I**, **1.II-11.II**, and **1.III-8.III** at 0.003 mg/mL in the time range of 0, 5, 15, 30, 60, 90, and 120 minutes.

| 0.003 mg/mL  |            | DPPH scavenging activity (%) |            |            |            |            |            |
|--------------|------------|------------------------------|------------|------------|------------|------------|------------|
| Compd.       | 0 min      | 5 min                        | 15 min     | 30 min     | 60 min     | 90 min     | 120 min    |
| Asc. Acid    | 33.5 ± 0.5 | 33.6 ± 0.4                   | 34.5 ± 1.6 | 34.1 ± 1.1 | 34.0 ± 0.9 | 34.0 ± 0.8 | 34.0 ± 0.7 |
| Trolox       | 28.4 ± 1.0 | 29.2 ± 1.0                   | 29.2 ± 0.9 | 29.2 ± 0.8 | 29.2 ± 0.8 | 29.2       | 29.1       |
| <b>1.I</b>   | 0.0 ± 1.7  | 1.1 ± 2.0                    | 3.5 ± 2.0  | 6.6 ± 2.0  | 11.7 ± 2.3 | 15.5 ± 2.5 | 17.5 ± 2.3 |
| <b>2.I</b>   | 0.0 ± 1.5  | 4.9 ± 3.6                    | 8.2 ± 3.3  | 11.4 ± 2.7 | 16.0 ± 3.4 | 17.0 ± 2.2 | 17.8 ± 2.2 |
| <b>5.I</b>   | 1.7 ± 1.1  | 2.9 ± 1.1                    | 4.6 ± 1.2  | 6.4 ± 1.3  | 9.3 ± 1.4  | 11.4 ± 1.5 | 13.0 ± 1.6 |
| <b>6.I</b>   | 1.5 ± 0.5  | 2.0 ± 0.8                    | 2.5 ± 0.8  | 3.1 ± 0.6  | 4.4 ± 0.6  | 5.6 ± 0.7  | 6.6 ± 0.8  |
| <b>1.II</b>  | 1.7 ± 0.3  | 5.4 ± 0.5                    | 8.8 ± 0.9  | 12.1 ± 1.2 | 16.5 ± 1.5 | 19.5 ± 1.7 | 21.1 ± 1.4 |
| <b>2.II</b>  | 0.0 ± 1.0  | 6.4 ± 1.1                    | 10.4 ± 1.2 | 13.0 ± 1.2 | 15.2 ± 1.2 | 16.0 ± 1.2 | 16.3 ± 1.2 |
| <b>3.II</b>  | 0.0 ± 3.3  | 0.0 ± 3.2                    | 0.0 ± 3.1  | 0.5 ± 2.9  | 1.7 ± 2.9  | 2.5 ± 2.9  | 3.3 ± 2.9  |
| <b>4.II</b>  | 0.0 ± 2.9  | 0.0 ± 2.7                    | 0.0 ± 2.6  | 0.5 ± 2.5  | 1.7 ± 2.4  | 2.5 ± 2.4  | 3.1 ± 2.3  |
| <b>5.II</b>  | 1.3 ± 1.7  | 4.5 ± 1.7                    | 7.5 ± 1.7  | 10.4 ± 1.8 | 13.9 ± 1.9 | 16.2 ± 2.0 | 17.8 ± 2.1 |
| <b>6.II</b>  | 0.0 ± 2.9  | 0.0 ± 2.7                    | 0.0 ± 2.6  | 0.0 ± 2.6  | 0.0 ± 2.4  | 0.5 ± 2.3  | 1.1 ± 2.3  |
| <b>7.II</b>  | 3.6 ± 2.3  | 12.0 ± 2.2                   | 16.8 ± 1.3 | 18.9 ± 1.3 | 20.3 ± 1.2 | 20.7 ± 1.3 | 20.7 ± 1.3 |
| <b>8.II</b>  | 1.2 ± 1.4  | 2.8 ± 1.3                    | 5.0 ± 1.2  | 7.1 ± 1.1  | 9.7 ± 1.1  | 10.9 ± 1.2 | 11.7 ± 1.2 |
| <b>9.II</b>  | 0.1 ± 2.9  | 0.3 ± 2.7                    | 0.8 ± 2.5  | 1.5 ± 2.4  | 2.3 ± 2.3  | 3.0 ± 2.3  | 3.5 ± 2.3  |
| <b>10.II</b> | 0.9 ± 1.8  | 6.7 ± 1.7                    | 11.5 ± 1.5 | 14.7 ± 1.2 | 17.7 ± 1.1 | 19.0 ± 0.9 | 19.7 ± 0.9 |
| <b>11.II</b> | 0.0 ± 1.7  | 2.5 ± 1.4                    | 5.8 ± 1.2  | 8.6 ± 0.9  | 11.6 ± 1.0 | 12.8 ± 0.8 | 13.5 ± 0.7 |
| <b>1.III</b> | 1.5 ± 0.7  | 3.4 ± 0.6                    | 4.9 ± 0.7  | 6.5 ± 0.7  | 8.5 ± 1.0  | 9.6 ± 0.9  | 10.0 ± 0.8 |
| <b>2.III</b> | 2.4 ± 0.6  | 4.3 ± 0.4                    | 5.4 ± 0.3  | 6.5 ± 0.5  | 7.1 ± 0.5  | 7.3 ± 0.6  | 7.3 ± 0.6  |
| <b>3.III</b> | 0.9 ± 1.9  | 1.2 ± 1.8                    | 1.9 ± 1.7  | 2.7 ± 1.7  | 4.1 ± 1.7  | 5.3 ± 1.7  | 6.2 ± 1.6  |
| <b>5.III</b> | 0.6 ± 1.2  | 2.9 ± 1.0                    | 5.1 ± 1.3  | 7.2 ± 1.6  | 9.8 ± 1.9  | 11.3 ± 2.0 | 12.3 ± 2.1 |
| <b>8.III</b> | 1.1 ± 2.3  | 2.4 ± 2.2                    | 4.4 ± 2.0  | 6.2 ± 1.9  | 8.3 ± 1.8  | 9.2 ± 1.8  | 9.7 ± 1.8  |

The percentage of inhibition of DPPH is presented as the mean ± SEM of three independent experiments performed in triplicates.

**Table S4.** Antioxidant activity of hit compounds at 0.0015 mg/mL was evaluated using the H<sub>2</sub>O<sub>2</sub>-induced DU-145 cells oxidative damage model at different concentrations of H<sub>2</sub>O<sub>2</sub>.

| Compound                      | 200 µM H <sub>2</sub> O <sub>2</sub> |               | 250 µM H <sub>2</sub> O <sub>2</sub> |               | 300 µM H <sub>2</sub> O <sub>2</sub> |               |
|-------------------------------|--------------------------------------|---------------|--------------------------------------|---------------|--------------------------------------|---------------|
|                               | Cell growth inhibition (%)           | Increase-fold | Cell growth inhibition (%)           | Increase-fold | Cell growth inhibition (%)           | Increase-fold |
| H <sub>2</sub> O <sub>2</sub> | 36.9 ± 6.9                           |               | 53.4 ± 6.1                           |               | 66.8 ± 6.3                           |               |
| <b>1.I</b>                    | 14.7 ± 2.3                           | 2.3 ± 0.7     | 17.8 ± 2.1                           | 2.7 ± 0.4     | 24.6 ± 3.0                           | 2.3 ± 0.3     |
| <b>2.I</b>                    | 6.8 ± 4.9                            | 2.9 ± 1.5     | 13.5 ± 0.7                           | 3.1 ± 1.3     | 18.4 ± 7.5                           | 2.9 ± 1.2     |
| <b>5.I</b>                    | 10.6 ± 6.1                           | 3.1 ± 0.5     | 18.6 ± 1.4                           | 2.7 ± 0.3     | 24.4 ± 4.7                           | 2.4 ± 0.4     |
| <b>7.II</b>                   | 24.9 ± 3.4                           | 1.5 ± 0.2     | 43.5 ± 6.8                           | 1.2 ± 0.3     | 46.4 ± 7.4                           | 1.4 ± 0.3     |
| <b>10.II</b>                  | 31.4 ± 8.9                           | 1.0 ± 0.6     | 48.3 ± 9.8                           | 1.1 ± 0.2     | 58.5 ± 8.6                           | 1.1 ± 0.2     |
| Asc. Acid                     | 9.1 ± 0.8                            | 3.6 ± 0.3     | 16.6 ± 3.1                           | 2.9 ± 0.7     | 37.0 ± 4.1                           | 1.5 ± 0.2     |

The percentage of cell growth inhibition is presented as the mean ± SEM of three independent experiments performed in triplicates.

**Table S5.** Antioxidant activity of hit compounds at 0.0003 mg/mL evaluated using the H<sub>2</sub>O<sub>2</sub>-induced DU-145 cells oxidative damage model at different concentrations of H<sub>2</sub>O<sub>2</sub>.

| Compound                      | 200 µM H <sub>2</sub> O <sub>2</sub> |               | 250 µM H <sub>2</sub> O <sub>2</sub> |               | 300 µM H <sub>2</sub> O <sub>2</sub> |               |
|-------------------------------|--------------------------------------|---------------|--------------------------------------|---------------|--------------------------------------|---------------|
|                               | Cell growth inhibition (%)           | Increase-fold | Cell growth inhibition (%)           | Increase-fold | Cell growth inhibition (%)           | Increase-fold |
| H <sub>2</sub> O <sub>2</sub> | 36.9 ± 6.9                           |               | 53.4 ± 6.1                           |               | 66.8 ± 6.3                           |               |
| <b>1.I</b>                    | 16.3 ± 2.7                           | 2.0 ± 0.0     | 26.3 ± 8.1                           | 2.0 ± 0.7     | 32.1 ± 7.7                           | 1.8 ± 0.4     |
| <b>2.I</b>                    | 25.3 ± 4.1                           | 0.8 ± 0.2     | 52.5 ± 8.4                           | 0.9 ± 0.2     | 37.5 ± 3.7                           | 1.0 ± 0.3     |
| <b>5.I</b>                    | 17.97 ± 5.4                          | 1.9 ± 0.3     | 24.8 ± 4.3                           | 1.9 ± 0.4     | 33.9 ± 8.5                           | 1.7 ± 0.4     |
| <b>7.II</b>                   | 21.0 ± 6.6                           | 2.3 ± 1.2     | 33.8 ± 3.6                           | 1.6 ± 0.2     | 37.3 ± 9.3                           | 1.8 ± 0.4     |
| <b>10.II</b>                  | 45.6 ± 4.1                           | 0.8 ± 0.4     | 51.3 ± 7.5                           | 1.0 ± 0.3     | 73.1 ± 9.6                           | 1.0 ± 0.2     |
| Asc. Acid                     | 7.9 ± 1.9                            | 4.2 ± 0.4     | 15.5 ± 2.8                           | 3.1 ± 0.7     | 26.8 ± 1.1                           | 2.2 ± 0.1     |

The percentage of cell growth inhibition is presented as the mean ± SEM of three independent experiments performed in triplicates.

**Table S6.** X-ray Crystallographic Data and Refinement Parameters for compound **1.II**.

|                                                                                                                                                                                                                      |                                                                                                                                   |
|----------------------------------------------------------------------------------------------------------------------------------------------------------------------------------------------------------------------|-----------------------------------------------------------------------------------------------------------------------------------|
| <i>Crystal data</i>                                                                                                                                                                                                  |                                                                                                                                   |
| C <sub>9</sub> H <sub>10</sub> N <sub>2</sub> O <sub>2</sub> Se                                                                                                                                                      | ?                                                                                                                                 |
| $M_r = 254.13$                                                                                                                                                                                                       | $D_x = 1.680 \text{ Mg m}^{-3}$                                                                                                   |
| Monoclinic, $P2_1/n$                                                                                                                                                                                                 | Melting point: ? K                                                                                                                |
| Hall symbol: ?                                                                                                                                                                                                       | Cu $K\alpha$ radiation, $\lambda = 1.54184 \text{ \AA}$                                                                           |
| $a = 11.2263 (1) \text{ \AA}$                                                                                                                                                                                        | Cell parameters from 5122 reflections                                                                                             |
| $b = 4.8613 (1) \text{ \AA}$                                                                                                                                                                                         | $\theta = 2.4\text{--}73.9^\circ$                                                                                                 |
| $c = 18.4256 (2) \text{ \AA}$                                                                                                                                                                                        | $\mu = 4.88 \text{ mm}^{-1}$                                                                                                      |
| $\beta = 92.093 (1)^\circ$                                                                                                                                                                                           | $T = 173 \text{ K}$                                                                                                               |
| $V = 1004.90 (3) \text{ \AA}^3$                                                                                                                                                                                      | Block, colourless                                                                                                                 |
| $Z = 4$                                                                                                                                                                                                              | $0.18 \times 0.15 \times 0.15 \text{ mm}$                                                                                         |
| $F(000) = 500$                                                                                                                                                                                                       |                                                                                                                                   |
| <i>Data collection</i>                                                                                                                                                                                               |                                                                                                                                   |
| ROD, Synergy Custom system, HyPix-Arc 150 diffractometer                                                                                                                                                             | 1901 independent reflections                                                                                                      |
| Radiation source: Rotating-anode X-ray tube, Rigaku (Cu) X-ray Source                                                                                                                                                | 1869 reflections with $I > 2\sigma(I)$                                                                                            |
| Mirror monochromator                                                                                                                                                                                                 | $R_{\text{int}} = 0.032$                                                                                                          |
| Detector resolution: $10.0000 \text{ pixels mm}^{-1}$                                                                                                                                                                | $\theta_{\text{max}} = 74.2^\circ$ , $\theta_{\text{min}} = 4.5^\circ$                                                            |
| $\omega$ scans                                                                                                                                                                                                       | $h = -13\text{--}12$                                                                                                              |
| Absorption correction: multi-scan<br><i>CrysAlis PRO</i> 1.171.41.109a (Rigaku Oxford Diffraction, 2021) Empirical absorption correction using spherical harmonics, implemented in SCALE3 ABSPACK scaling algorithm. | $k = -5\text{--}6$                                                                                                                |
| $T_{\text{min}} = 0.260$ , $T_{\text{max}} = 1.000$                                                                                                                                                                  | $l = -21\text{--}22$                                                                                                              |
| 4970 measured reflections                                                                                                                                                                                            |                                                                                                                                   |
| <i>Refinement</i>                                                                                                                                                                                                    |                                                                                                                                   |
| Refinement on $F^2$                                                                                                                                                                                                  | Secondary atom site location: ?                                                                                                   |
| Least-squares matrix: full                                                                                                                                                                                           | Hydrogen site location: inferred from neighbouring sites                                                                          |
| $R[F^2 > 2\sigma(F^2)] = 0.047$                                                                                                                                                                                      | H-atom parameters constrained                                                                                                     |
| $wR(F^2) = 0.124$                                                                                                                                                                                                    | $w = 1/[\sigma^2(F_o^2) + (0.0712P)^2 + 2.384P]$<br>where $P = (F_o^2 + 2F_c^2)/3$                                                |
| $S = 1.04$                                                                                                                                                                                                           | $(\Delta/\sigma)_{\text{max}} = 0.001$                                                                                            |
| 1901 reflections                                                                                                                                                                                                     | $\Delta\rho_{\text{max}} = 0.96 \text{ e \AA}^{-3}$                                                                               |
| 138 parameters                                                                                                                                                                                                       | $\Delta\rho_{\text{min}} = -0.63 \text{ e \AA}^{-3}$                                                                              |
| 0 restraints                                                                                                                                                                                                         | Extinction correction: <i>SHELXL2018/3</i> (Sheldrick 2018),<br>$F_c^* = kF_c[1 + 0.001x F_c^2 \lambda^3 / \sin(2\theta)]^{-1/4}$ |
| ? constraints                                                                                                                                                                                                        | Extinction coefficient: $0.0174 (12)$                                                                                             |
| Primary atom site location: dual                                                                                                                                                                                     |                                                                                                                                   |

**Table S7.** Selected Interatomic Distances ( $\text{\AA}$ ) and Angles ( $^\circ$ ) for compound **1.II**

|                                                                            |           |           |            |
|----------------------------------------------------------------------------|-----------|-----------|------------|
| <i>Geometric parameters (<math>\text{\AA}</math>, <math>^\circ</math>)</i> |           |           |            |
| Se1—C6                                                                     | 1.832 (3) | C1—C2     | 1.284 (8)  |
| O1—C1                                                                      | 1.350 (6) | C2—C3     | 1.469 (7)  |
| O1—C4                                                                      | 1.353 (4) | C3—C4     | 1.339 (5)  |
| O2—C5                                                                      | 1.215 (4) | C4—C5     | 1.466 (5)  |
| N7—C5                                                                      | 1.380 (4) | C7—C8     | 1.481 (6)  |
| N7—C6                                                                      | 1.390 (5) | C8—C9A    | 1.138 (11) |
| N9—C6                                                                      | 1.312 (4) | C8—C9B    | 1.160 (15) |
| N9—C7                                                                      | 1.457 (5) |           |            |
| C1—O1—C4                                                                   | 107.0 (4) | O2—C5—N7  | 123.4 (3)  |
| C5—N7—C6                                                                   | 127.1 (3) | O2—C5—C4  | 121.7 (3)  |
| C6—N9—C7                                                                   | 124.0 (3) | N7—C5—C4  | 114.8 (3)  |
| C2—C1—O1                                                                   | 110.4 (4) | N7—C6—Se1 | 117.2 (2)  |
| C1—C2—C3                                                                   | 108.4 (4) | N9—C6—Se1 | 125.0 (3)  |
| C4—C3—C2                                                                   | 102.8 (4) | N9—C6—N7  | 117.9 (3)  |
| O1—C4—C5                                                                   | 117.1 (3) | N9—C7—C8  | 114.8 (5)  |
| C3—C4—O1                                                                   | 111.3 (3) | C9A—C8—C7 | 133.0 (8)  |
| C3—C4—C5                                                                   | 131.6 (3) | C9B—C8—C7 | 154.1 (9)  |



### Spectroscopic characterization-NMR spectra

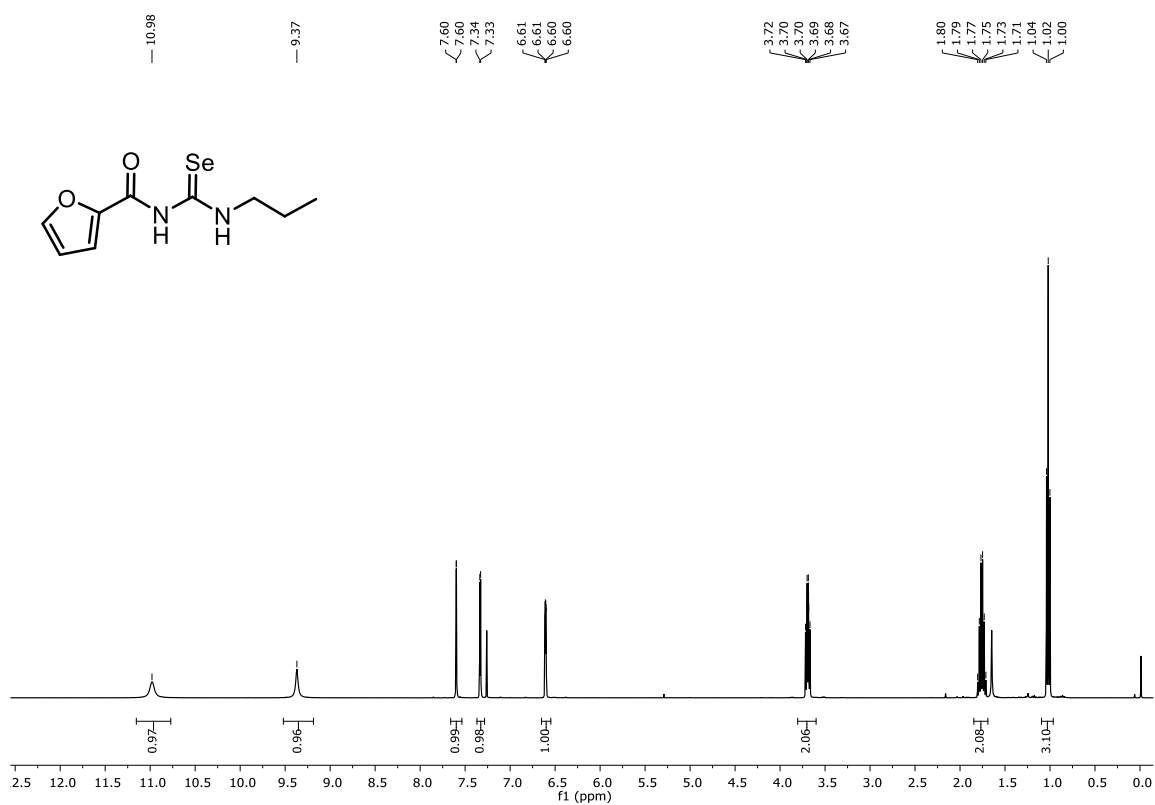

**Figure S1.** <sup>1</sup>H-NMR spectrum of compound **1.I**.

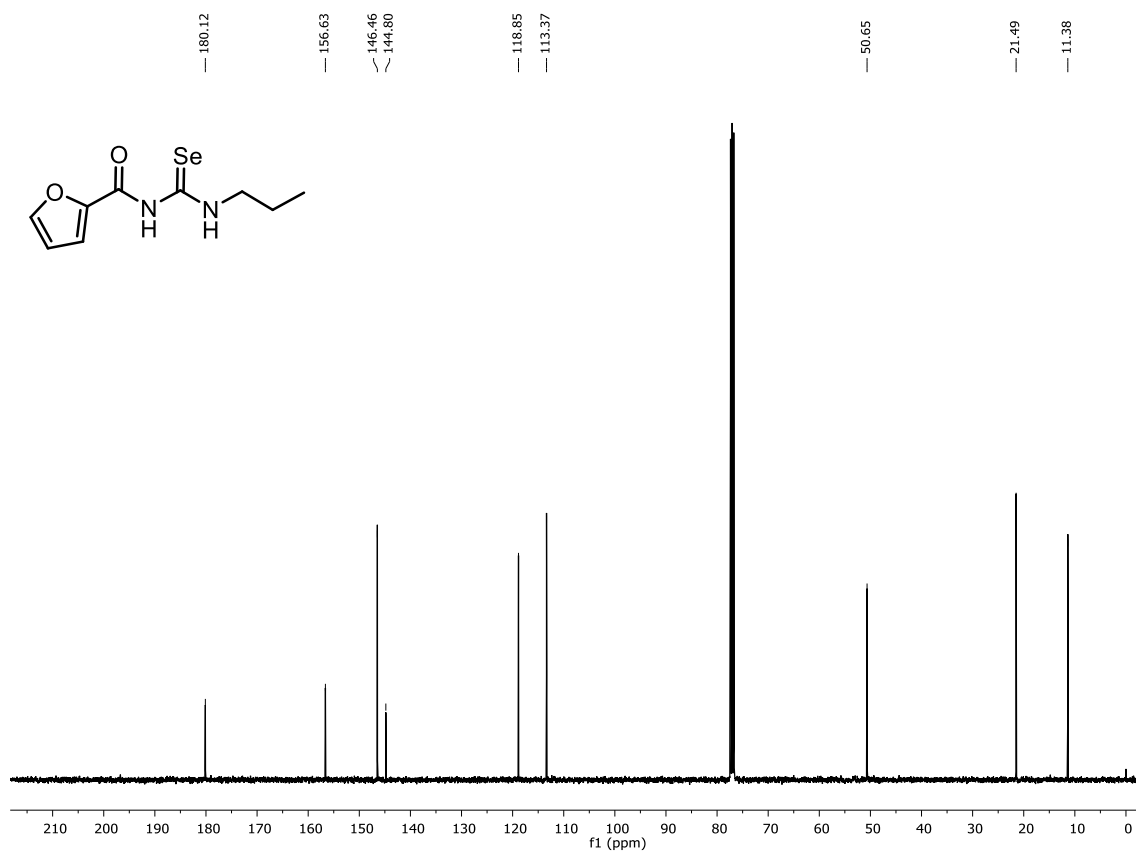

**Figure S2.** <sup>13</sup>C-NMR spectrum of compound **1.I**.

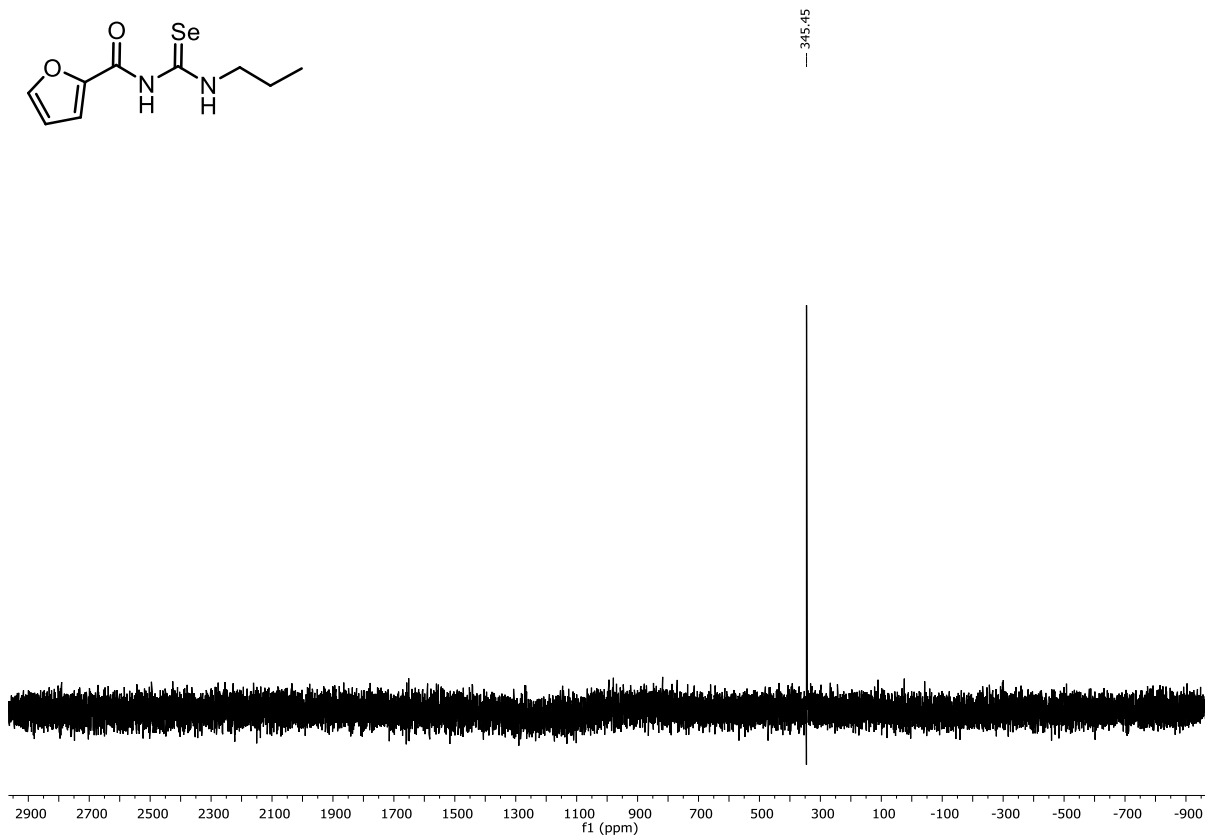

Figure S3.  $^{77}\text{Se}$ -NMR spectrum of compound **1.I**.

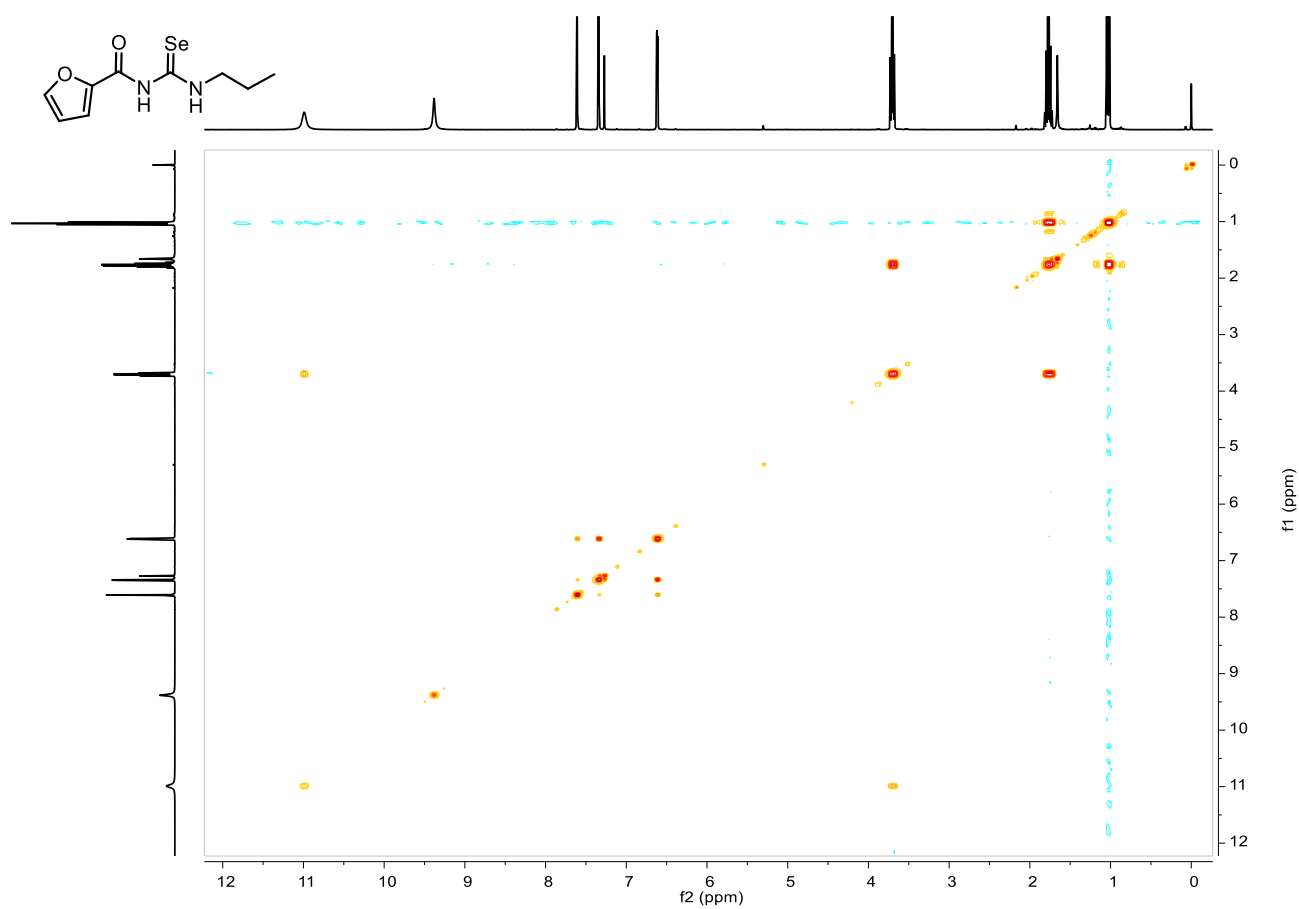

Figure S4. COSY-NMR spectrum of compound **1.I**.

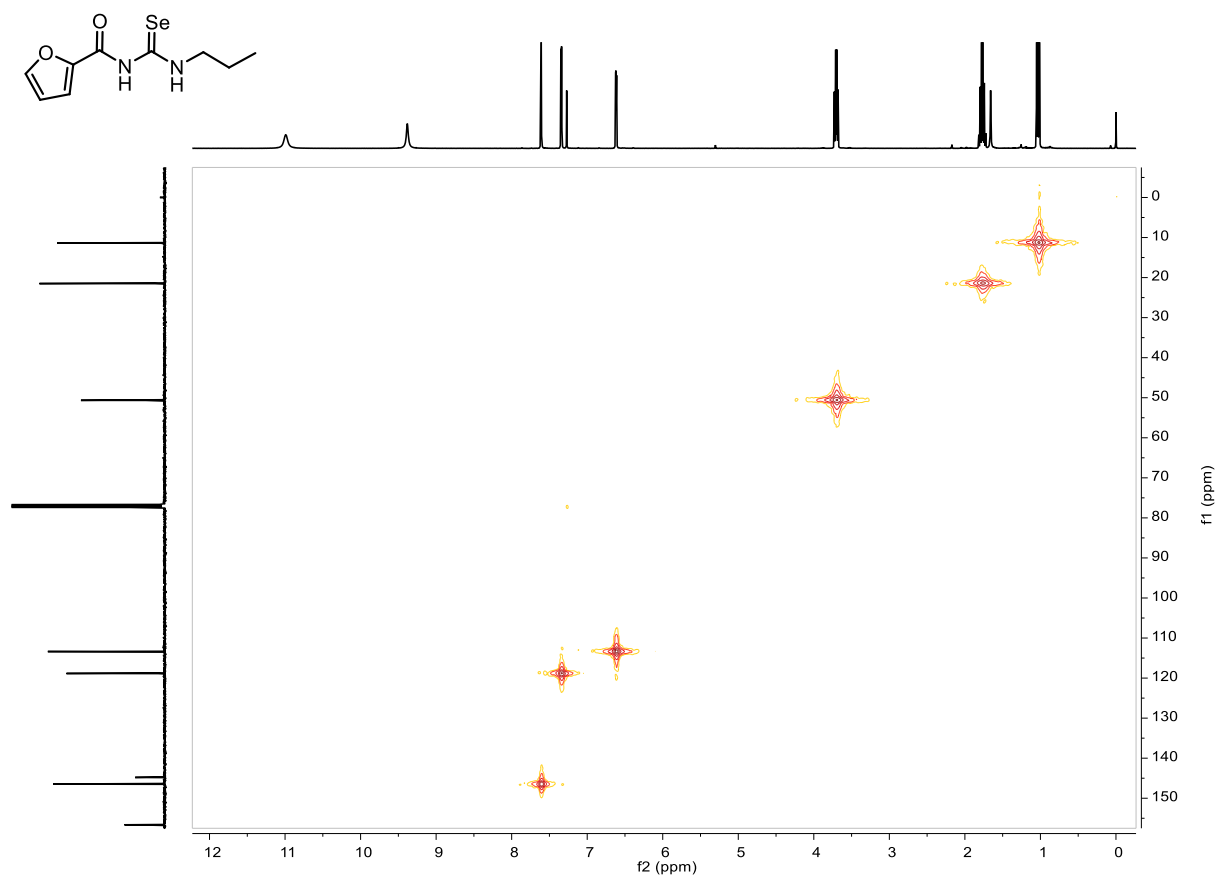

**Figure S5.** HMQC-NMR spectrum of compound **1.I**.

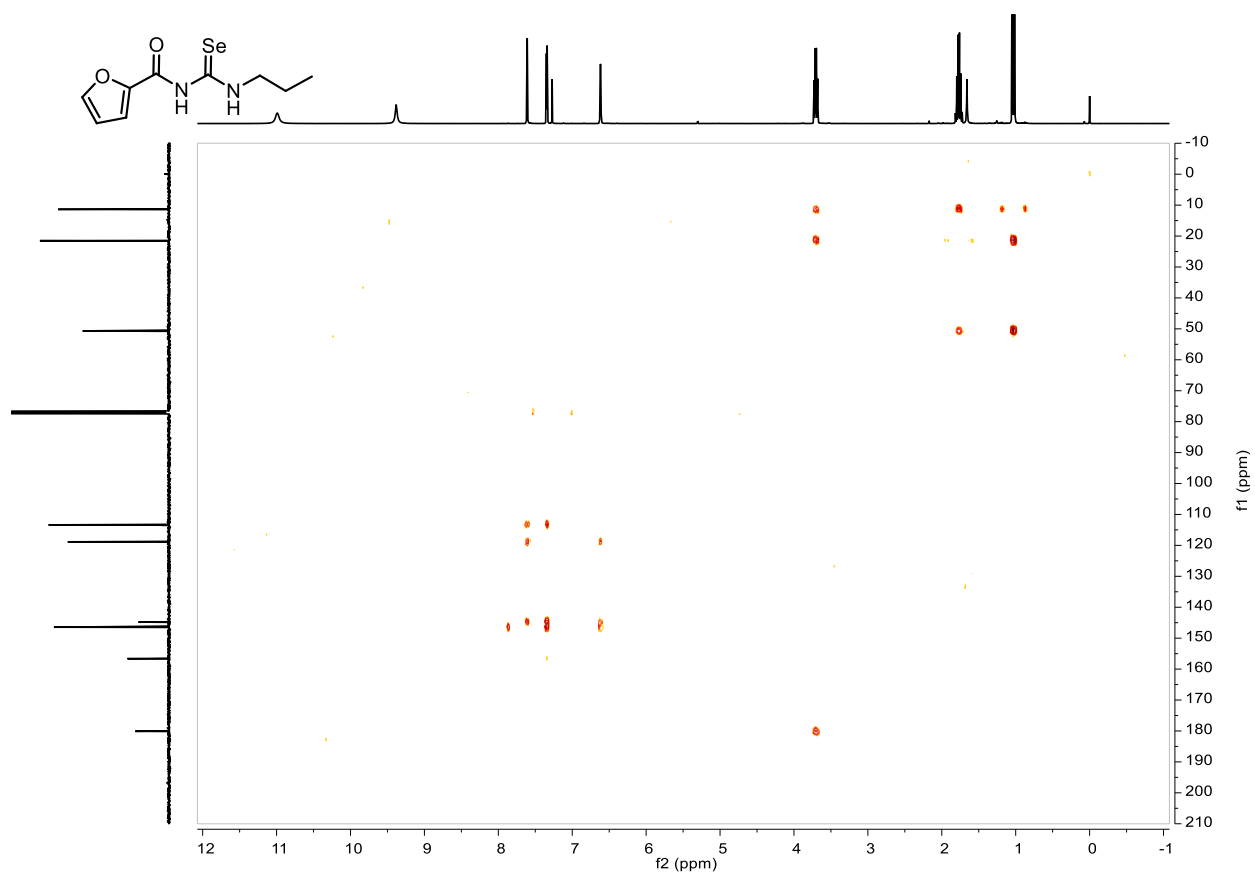

**Figure S6.** HMBC-NMR spectrum of compound **1.I**.

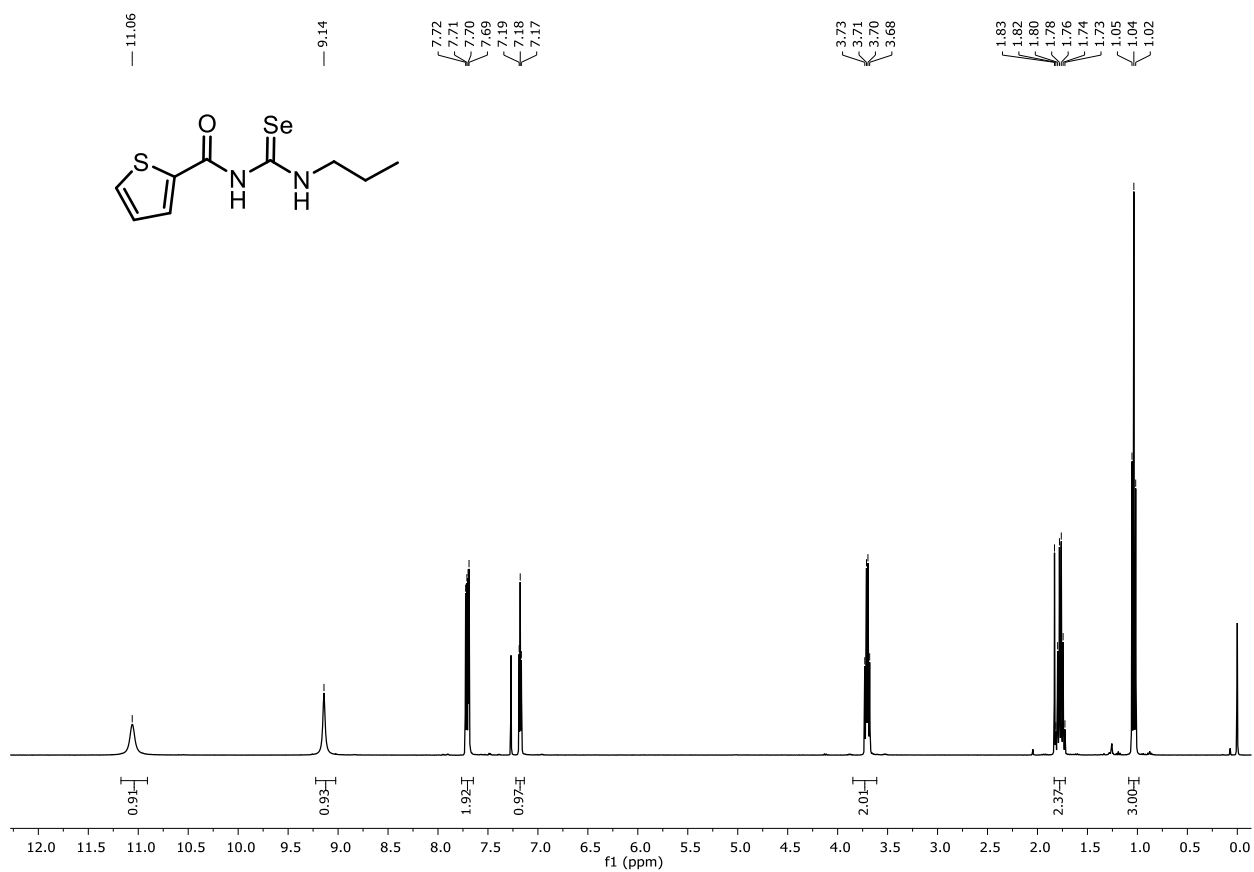

**Figure S7.** <sup>1</sup>H-NMR spectrum of compound **2.I**.

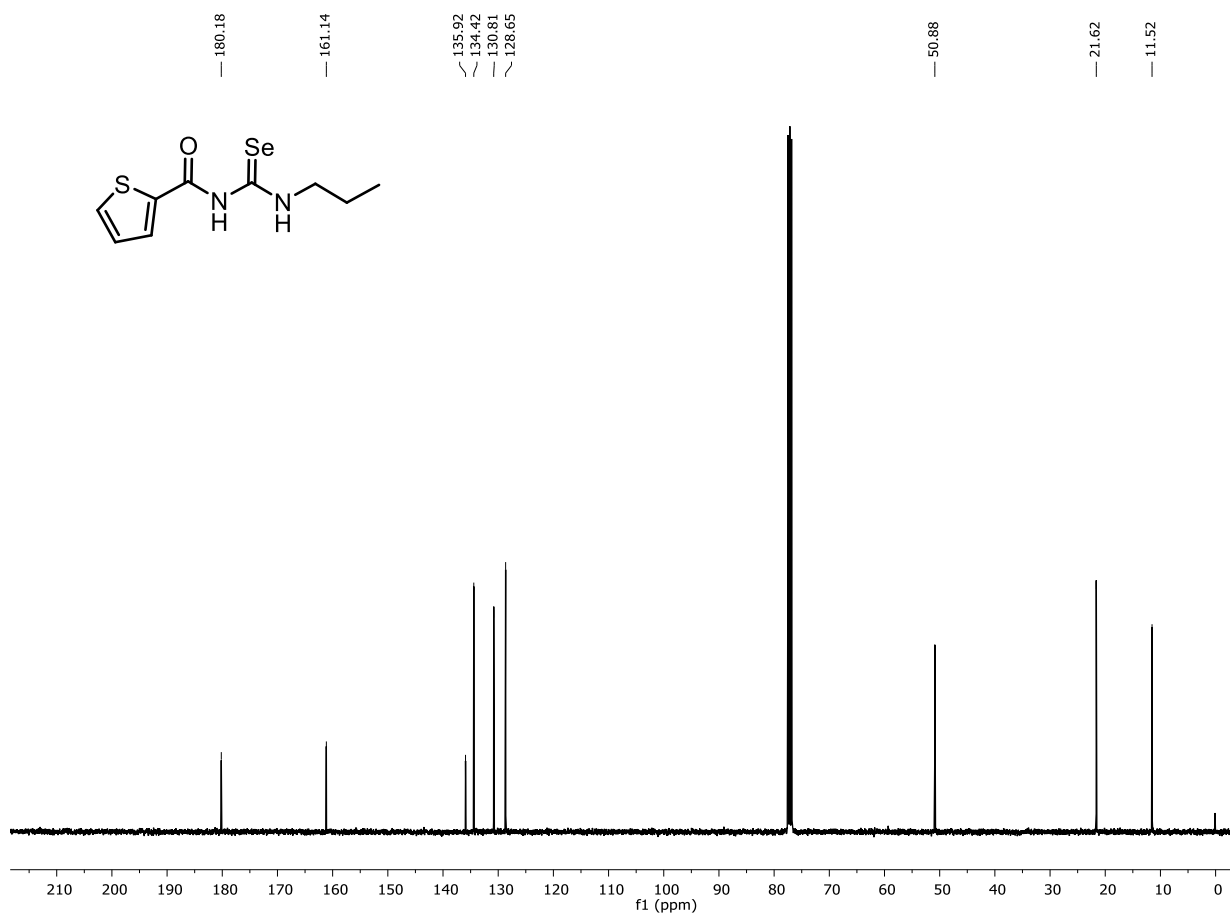

**Figure S8.** <sup>13</sup>C-NMR spectrum of compound **2.I**.

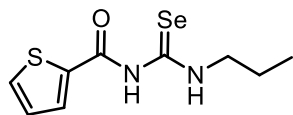

— 340.11

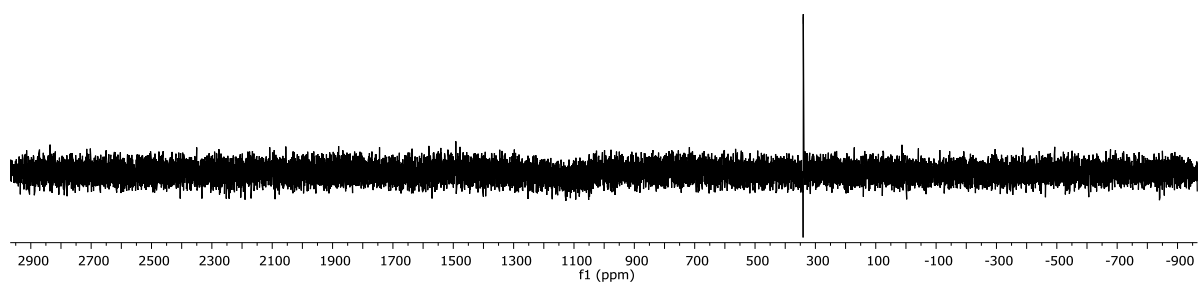

**Figure S9.**  $^{77}\text{Se}$ -NMR spectrum of compound **2.I**.

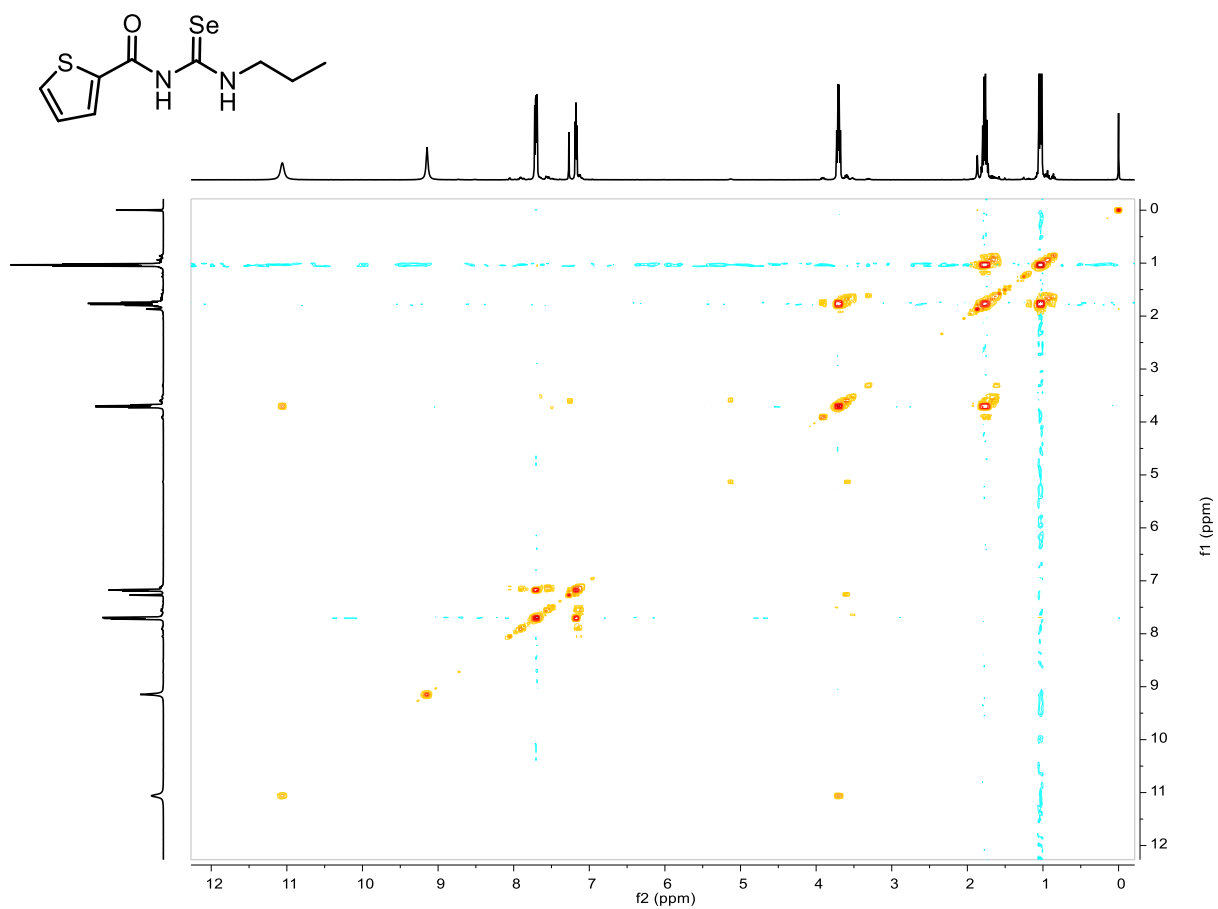

**Figure S10.** COSY-NMR spectrum of compound **2.I**.

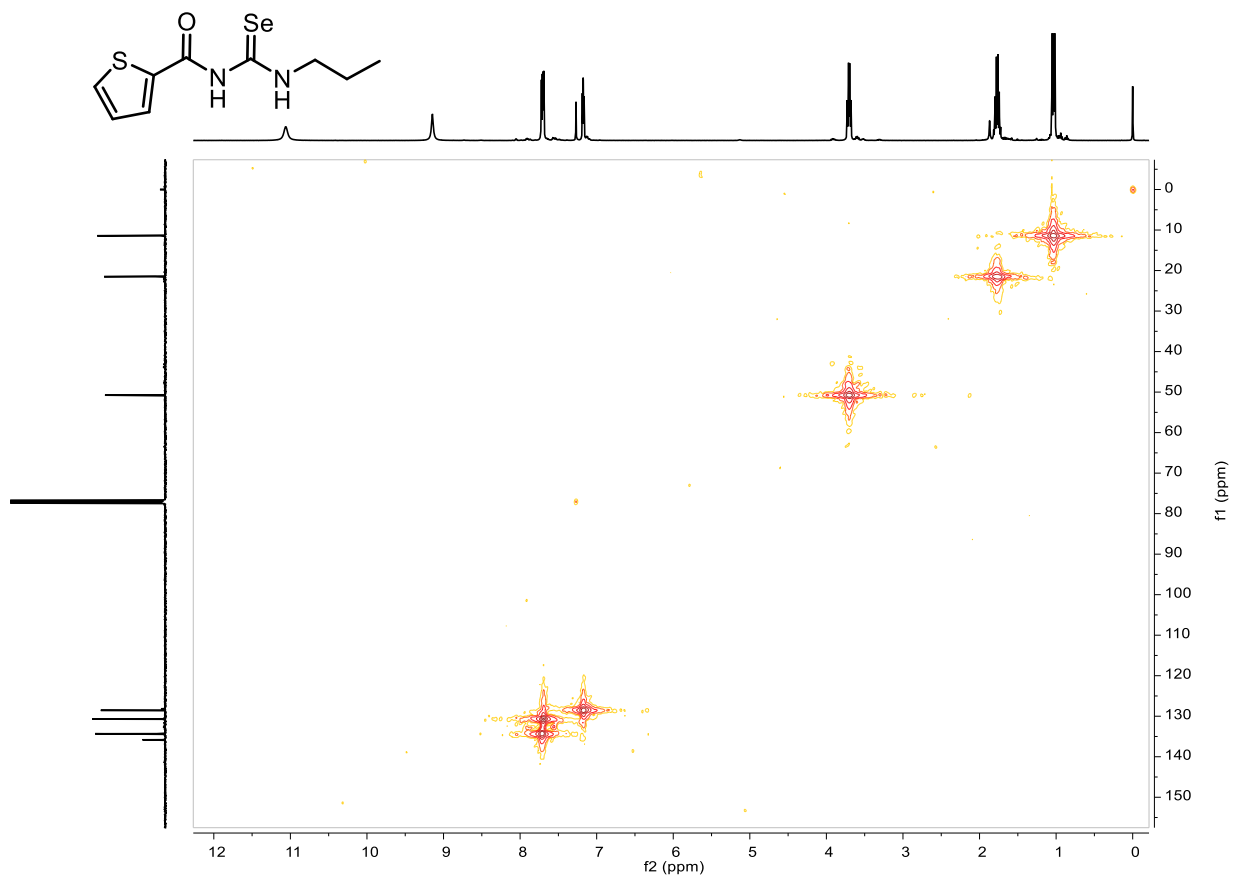

**Figure S11.** HMQC-NMR spectrum of compound **2.I**.

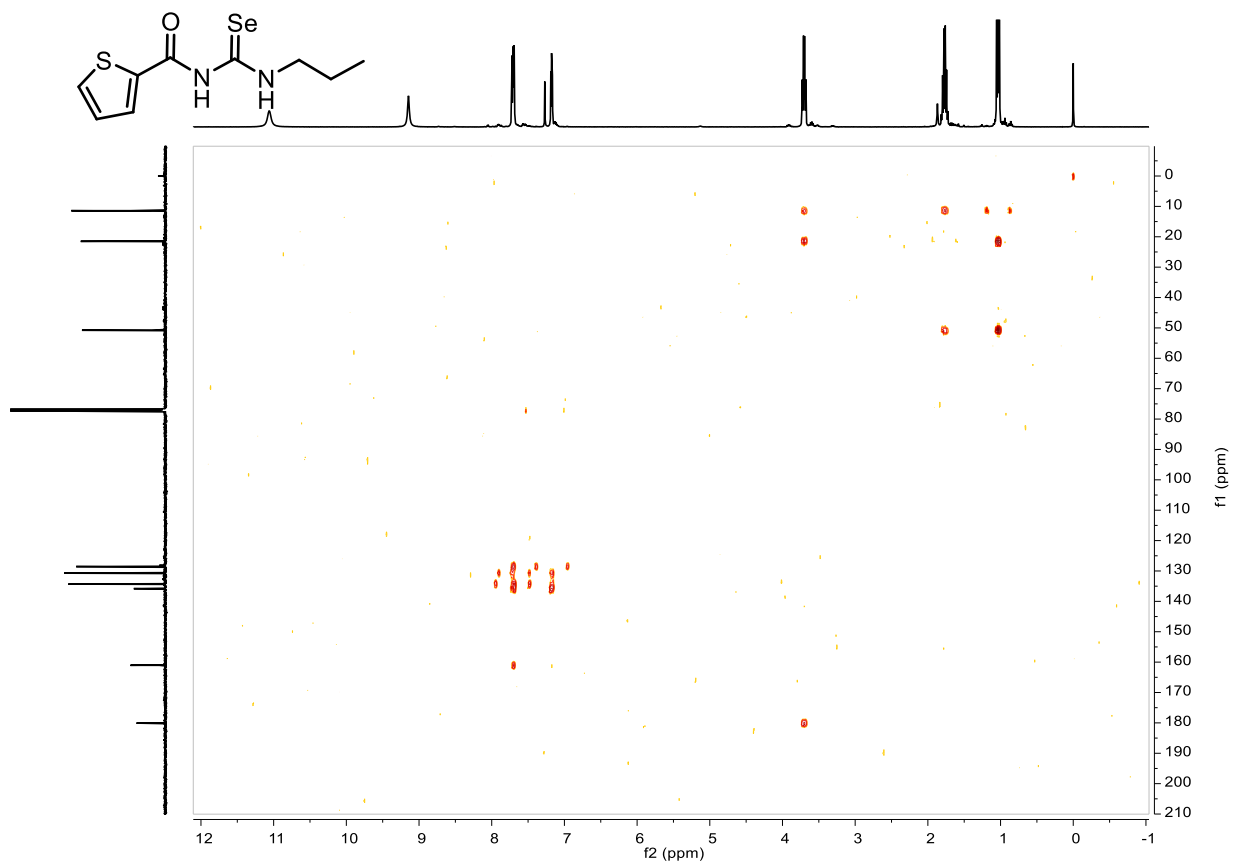

**Figure S12.** HMBC-NMR spectrum of compound **2.I**.

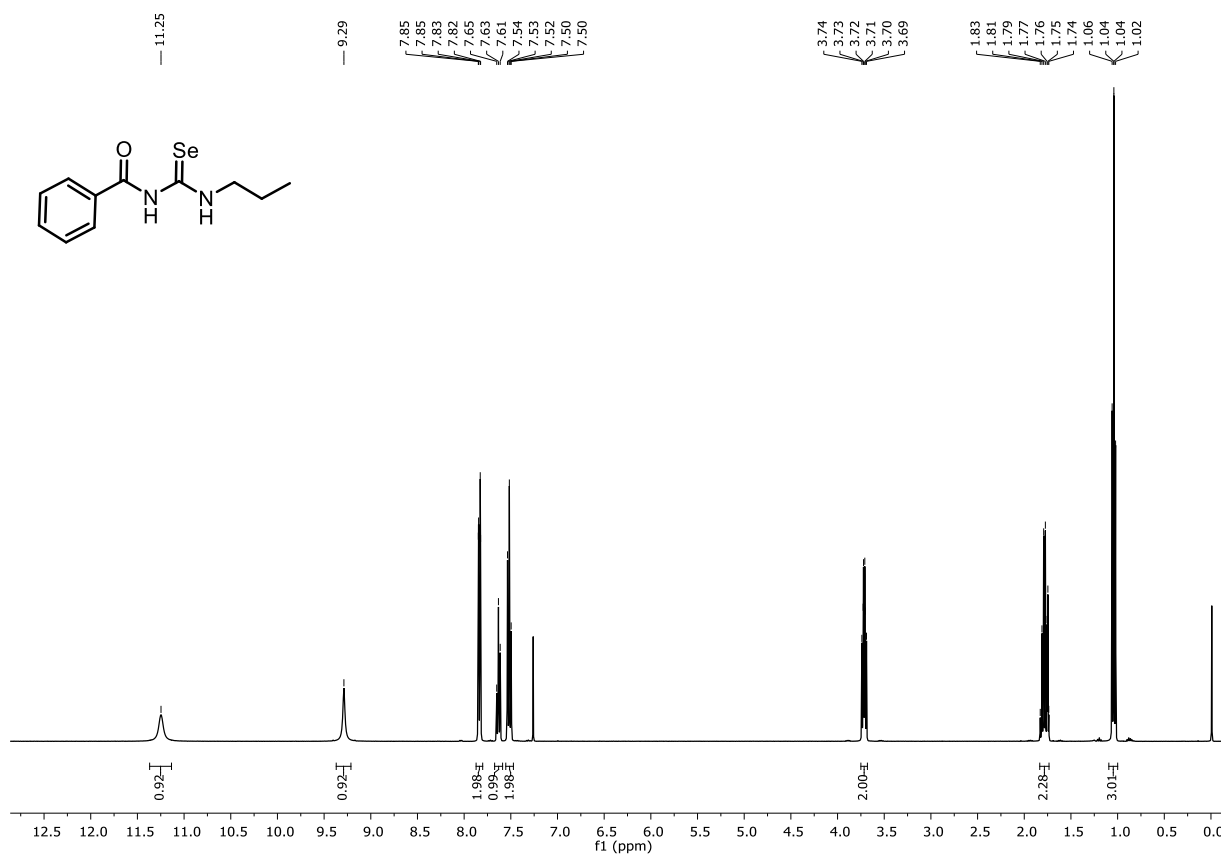

**Figure S13.** <sup>1</sup>H-NMR spectrum of compound **5.I**.

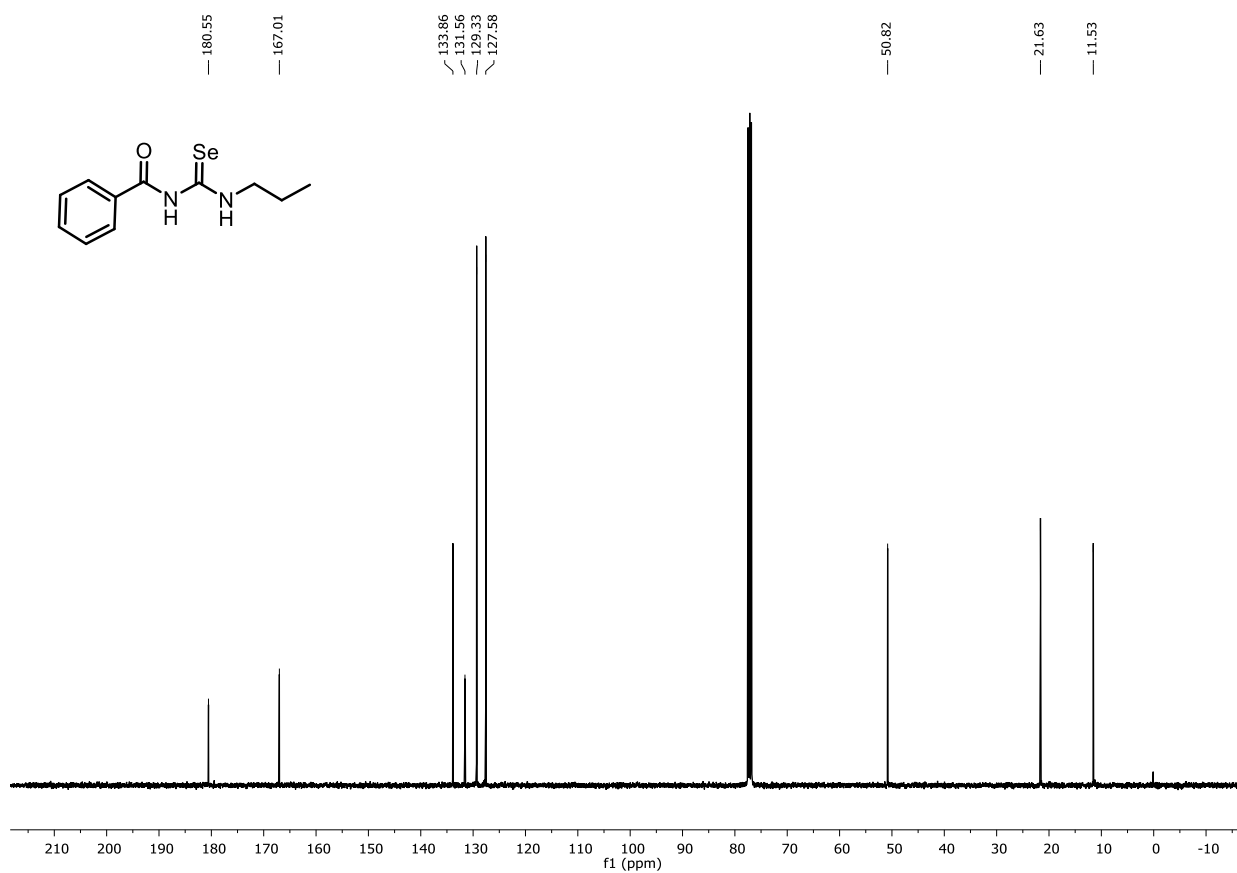

**Figure S14.** <sup>13</sup>C-NMR spectrum of compound **5.I**.

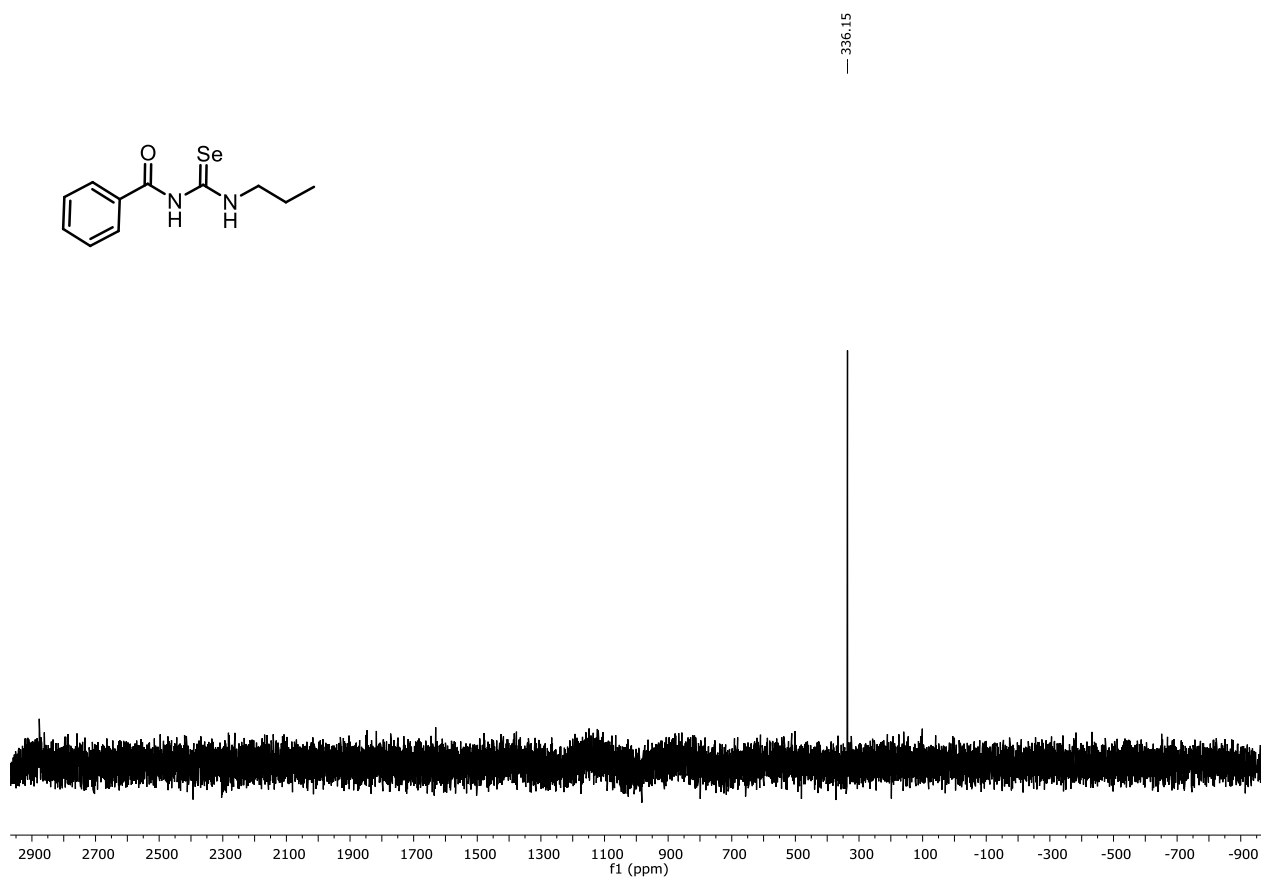

**Figure S15.**  $^{77}\text{Se}$ -NMR spectrum of compound **5.I**.

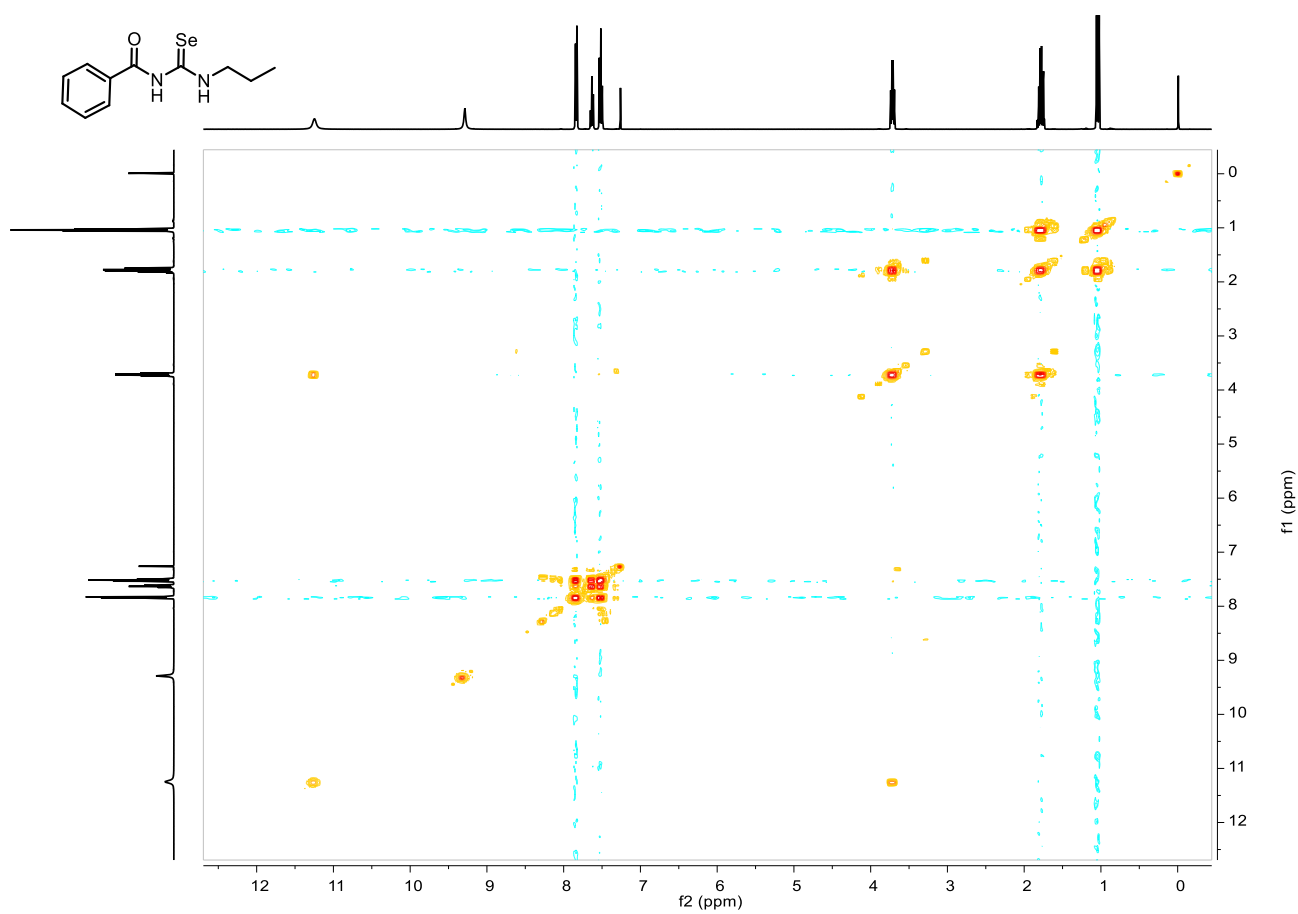

**Figure S16.** COSY-NMR spectrum of compound **5.I**.



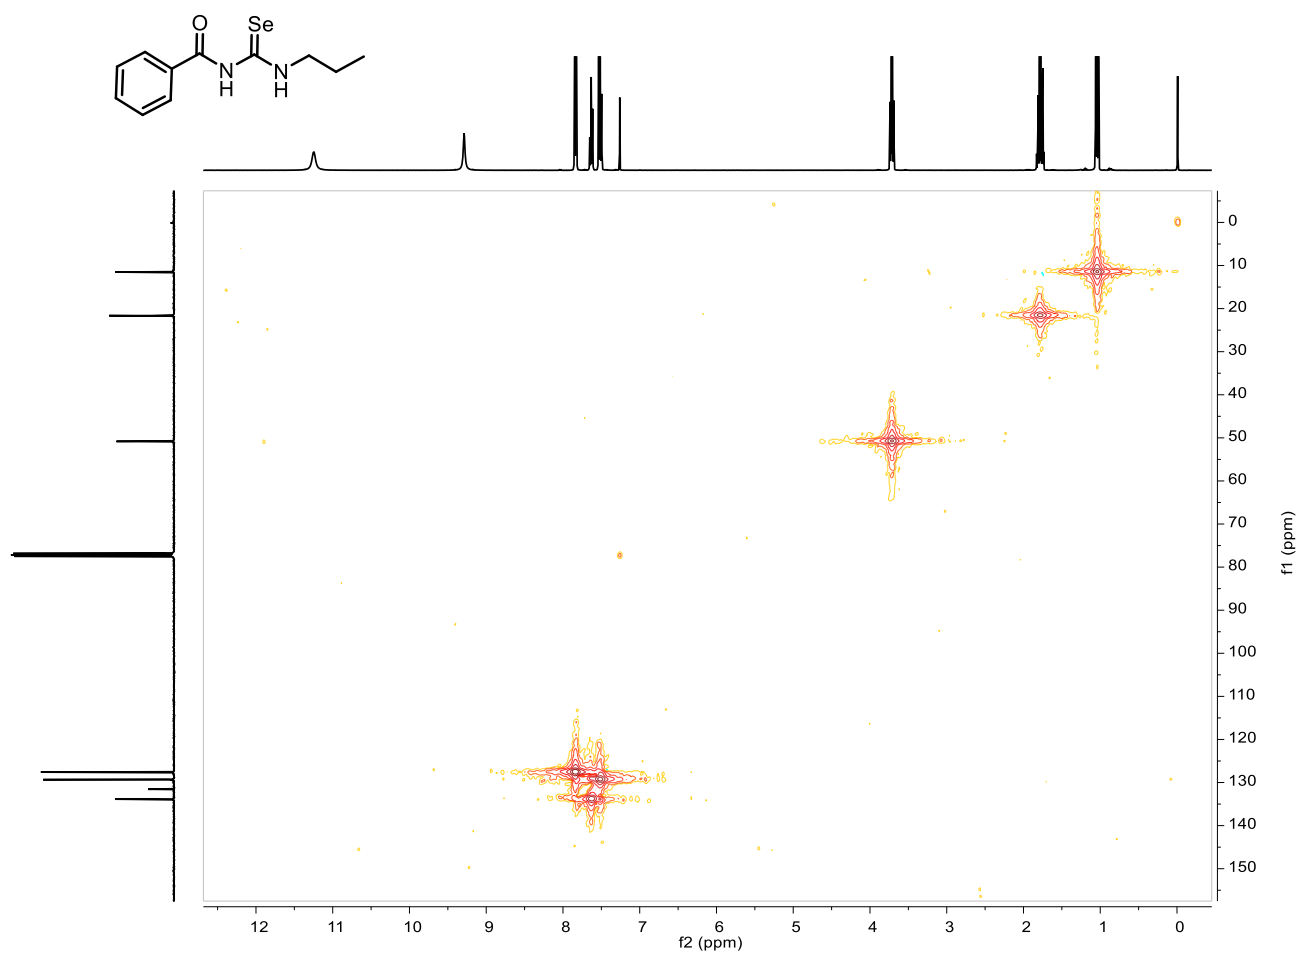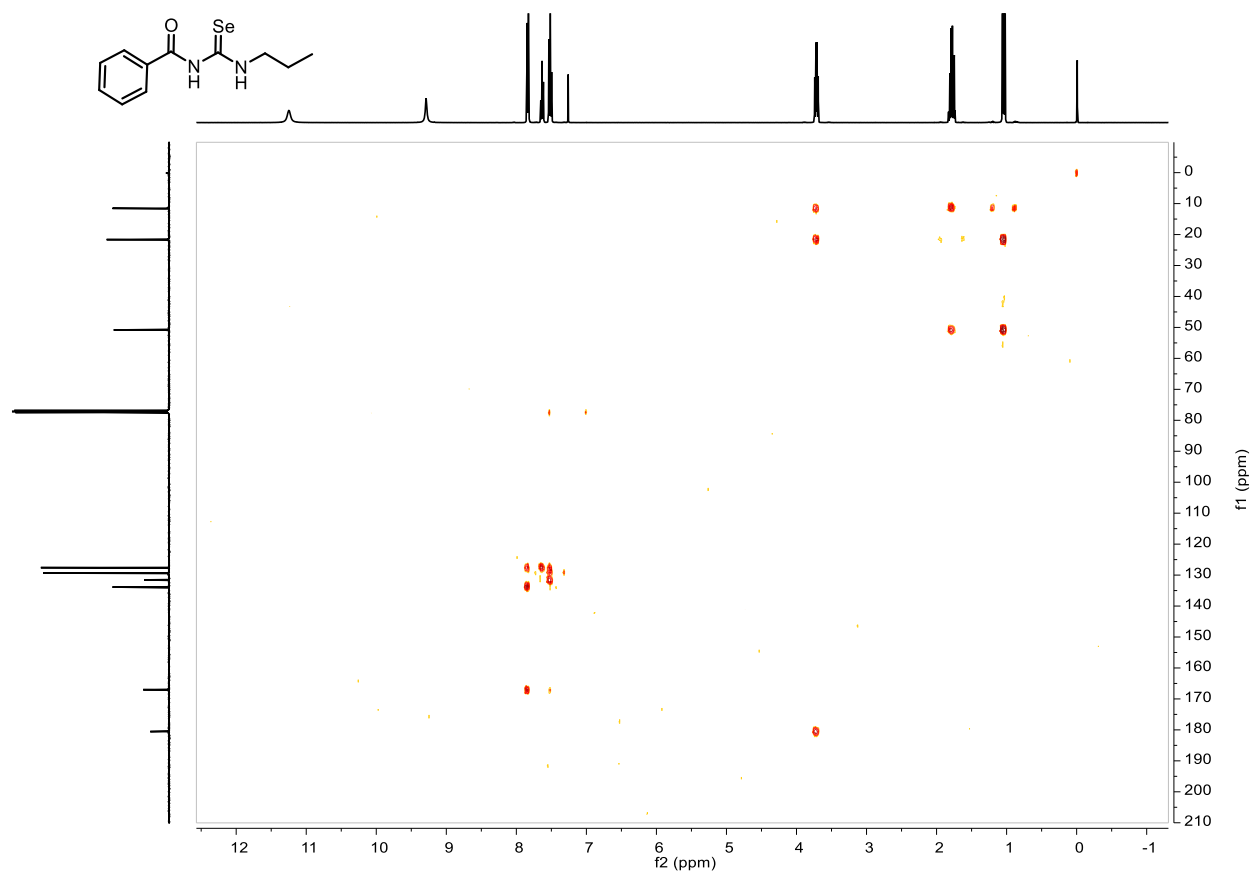

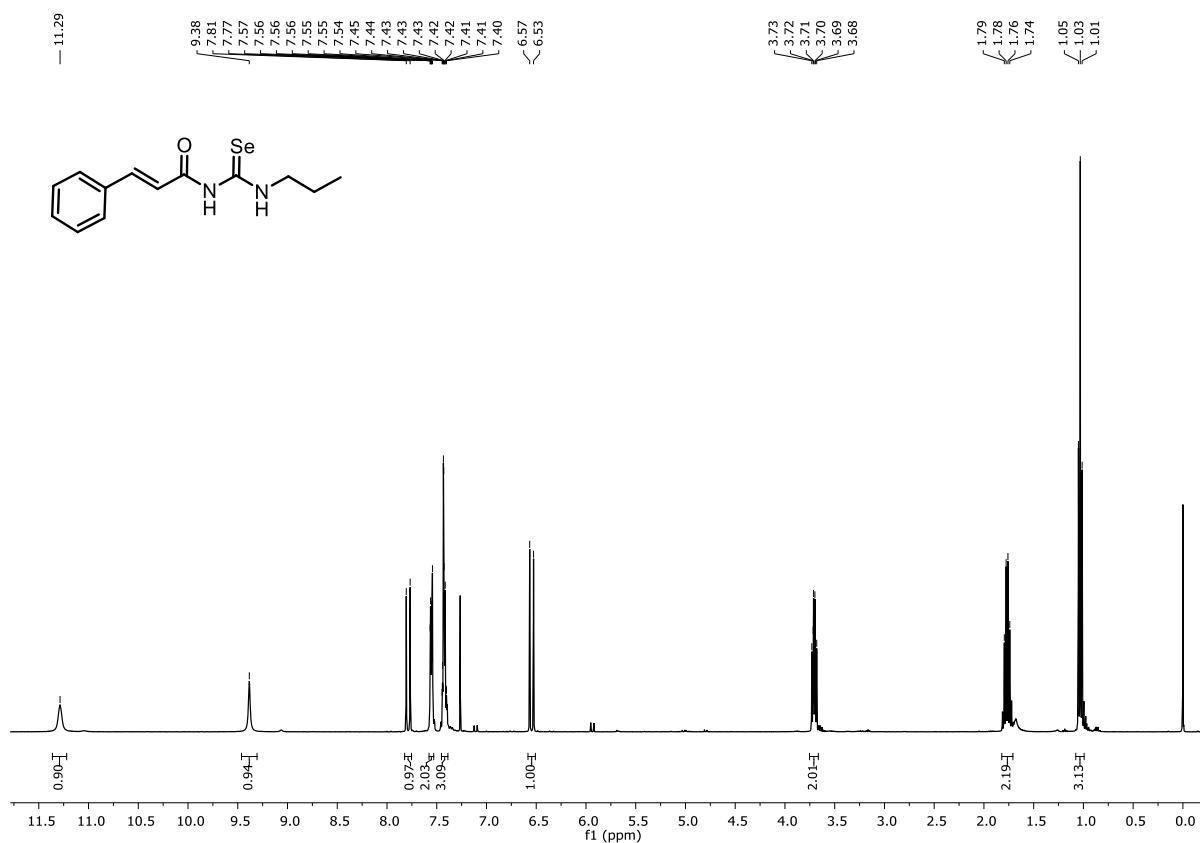

Figure S19. <sup>1</sup>H-NMR spectrum of compound 6.I.

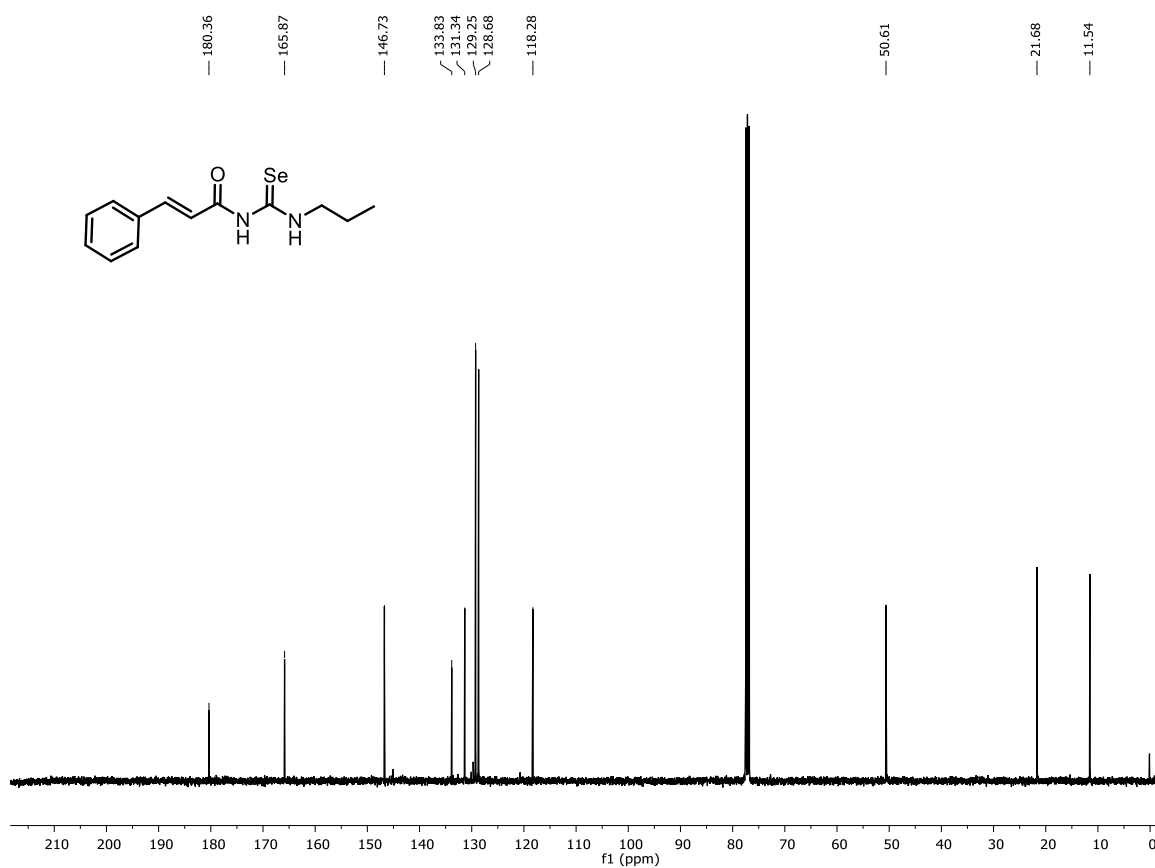

Figure S20. <sup>13</sup>C-NMR spectrum of compound 6.I.

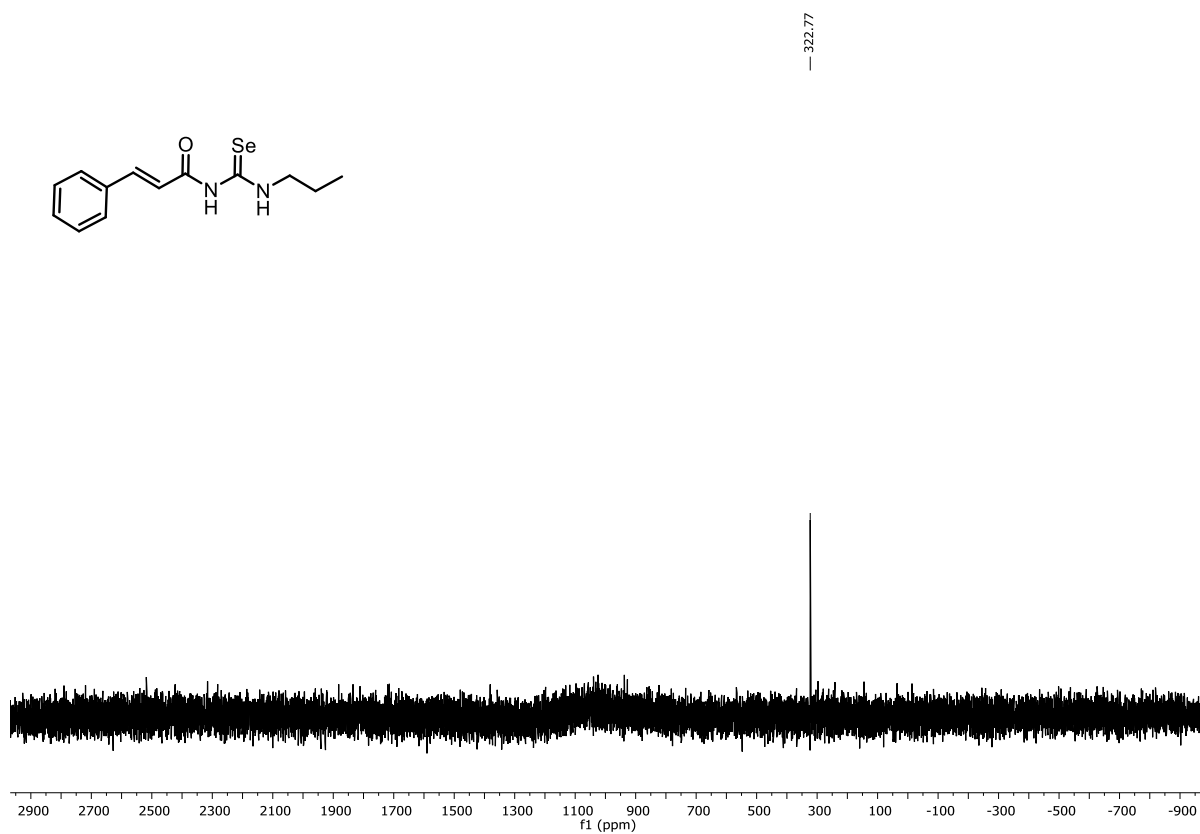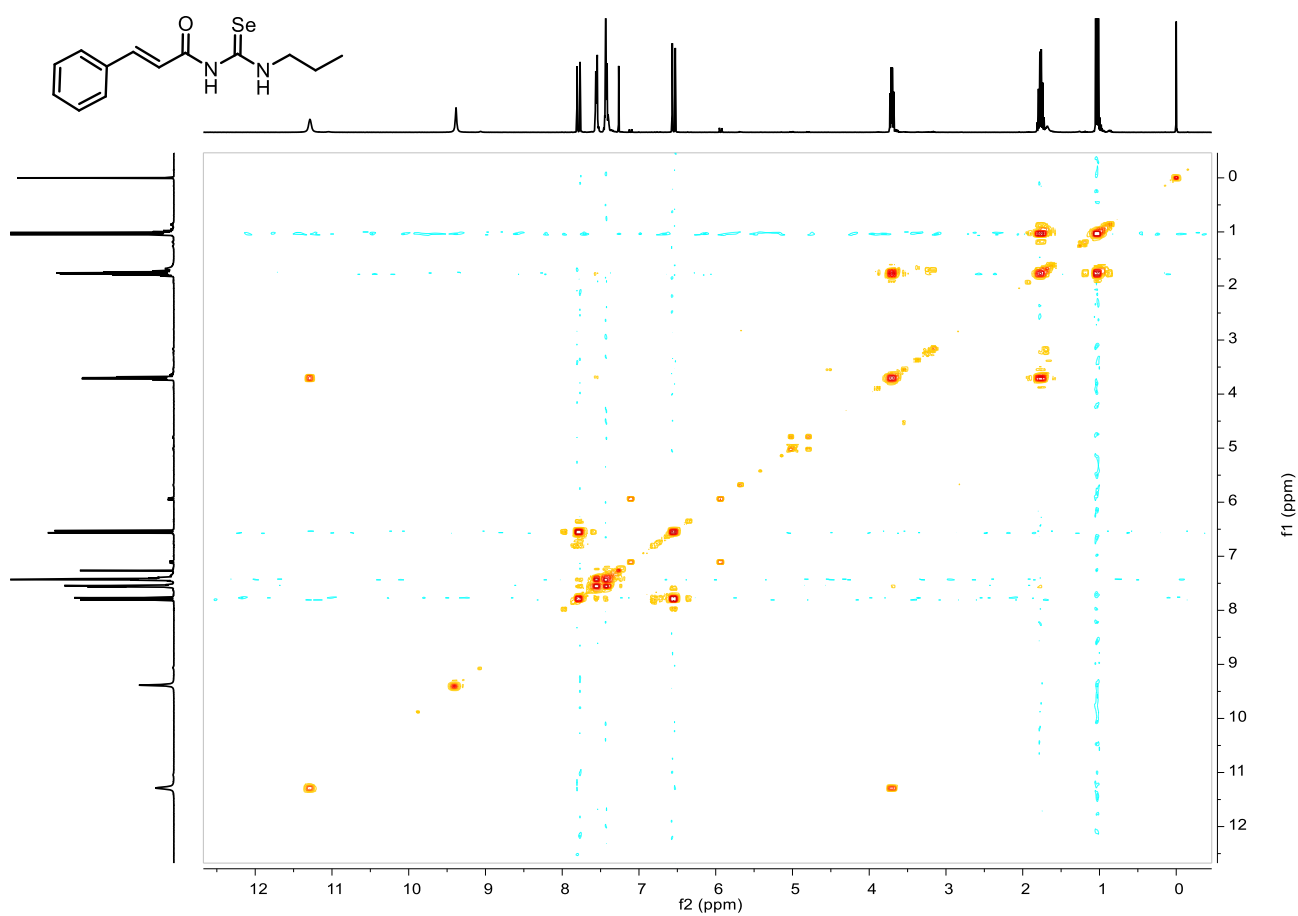

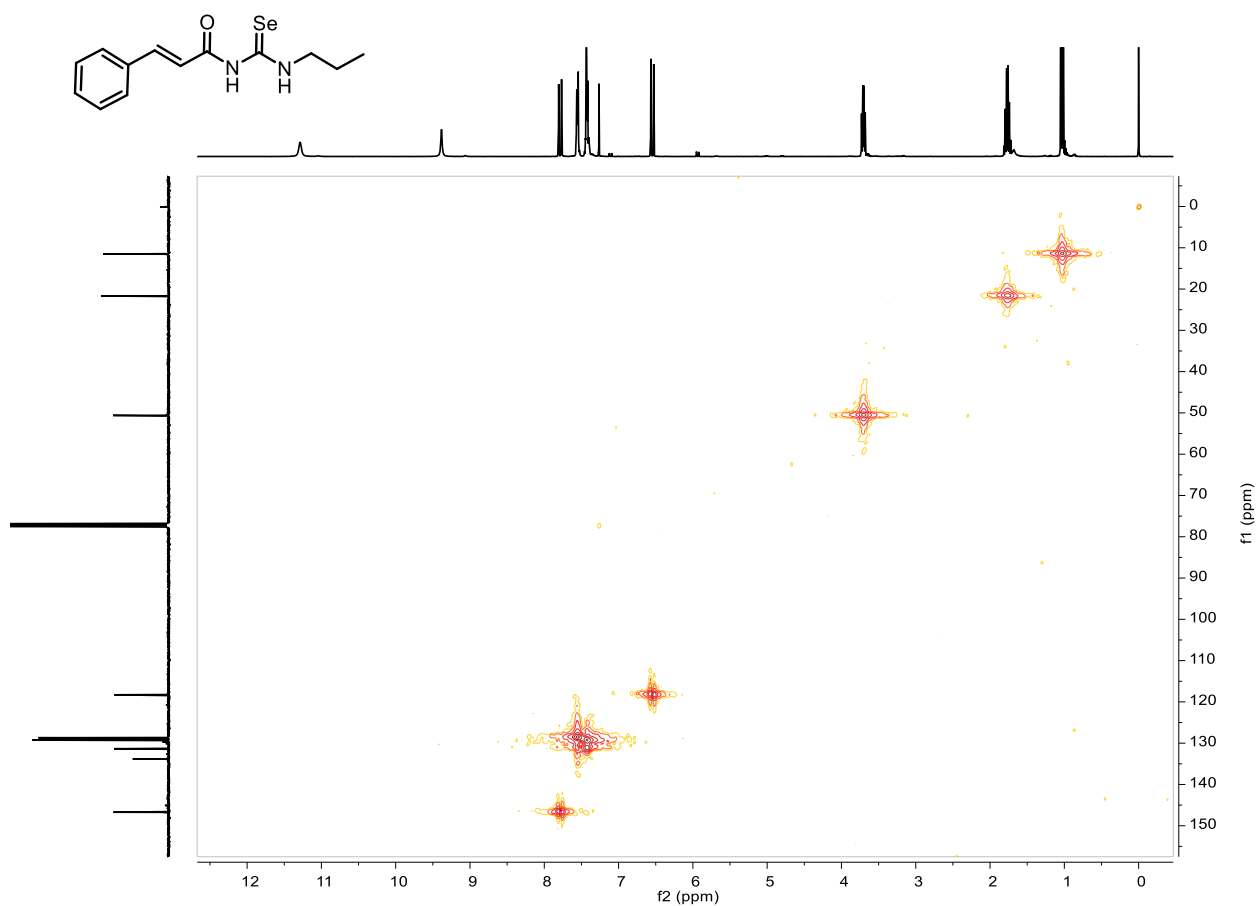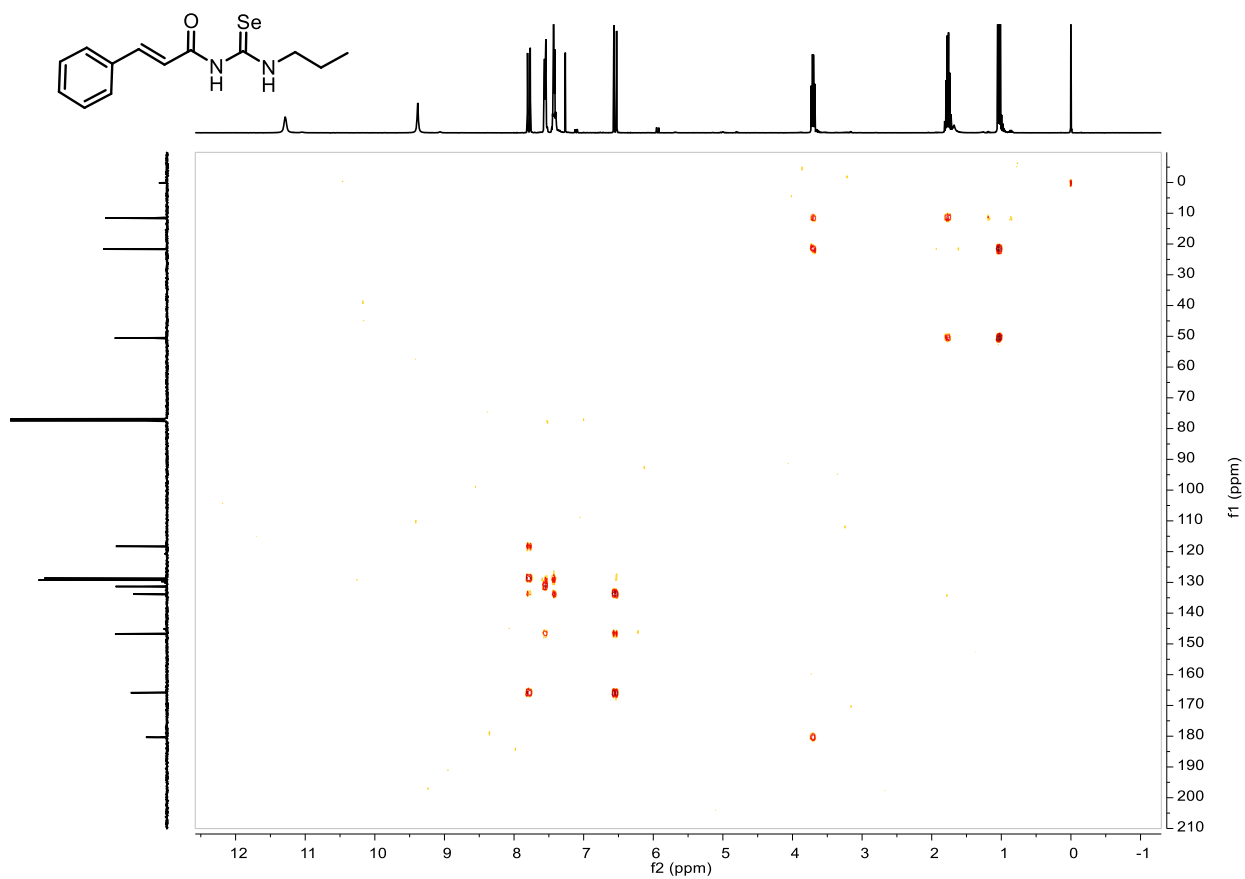

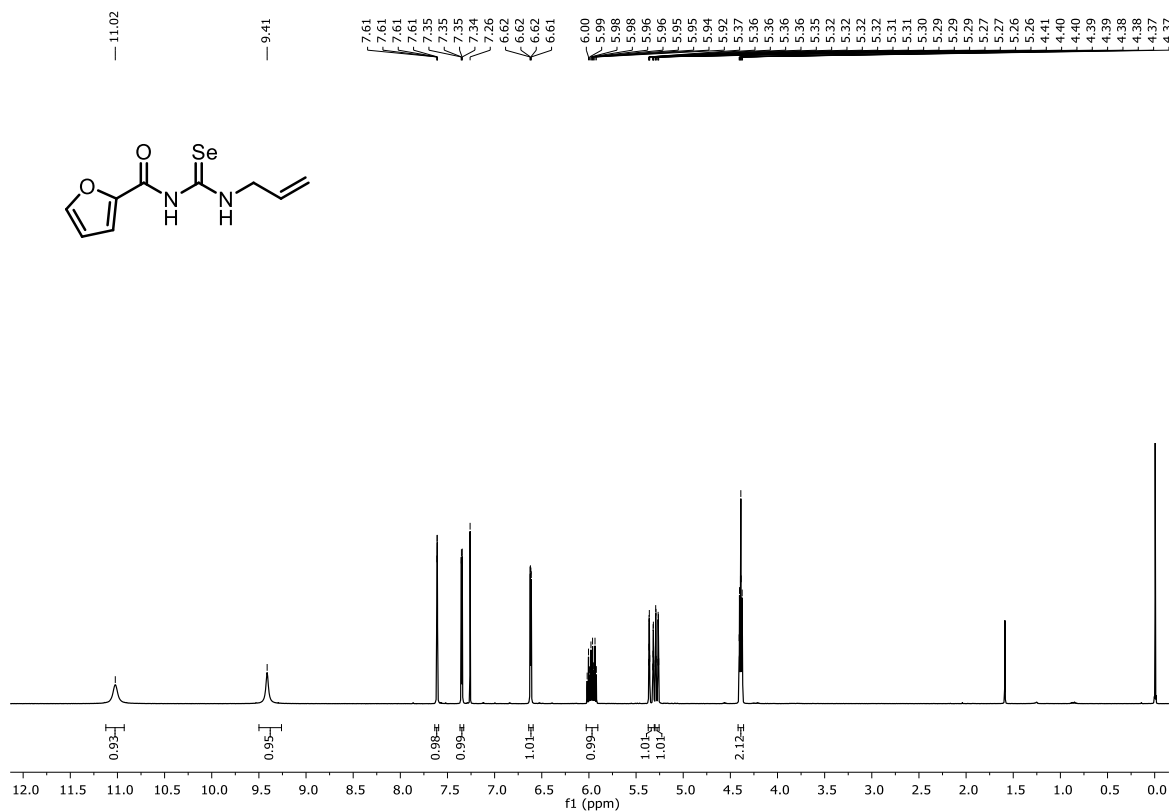

Figure S25.  $^1\text{H}$ -NMR spectrum of compound **1.II**.

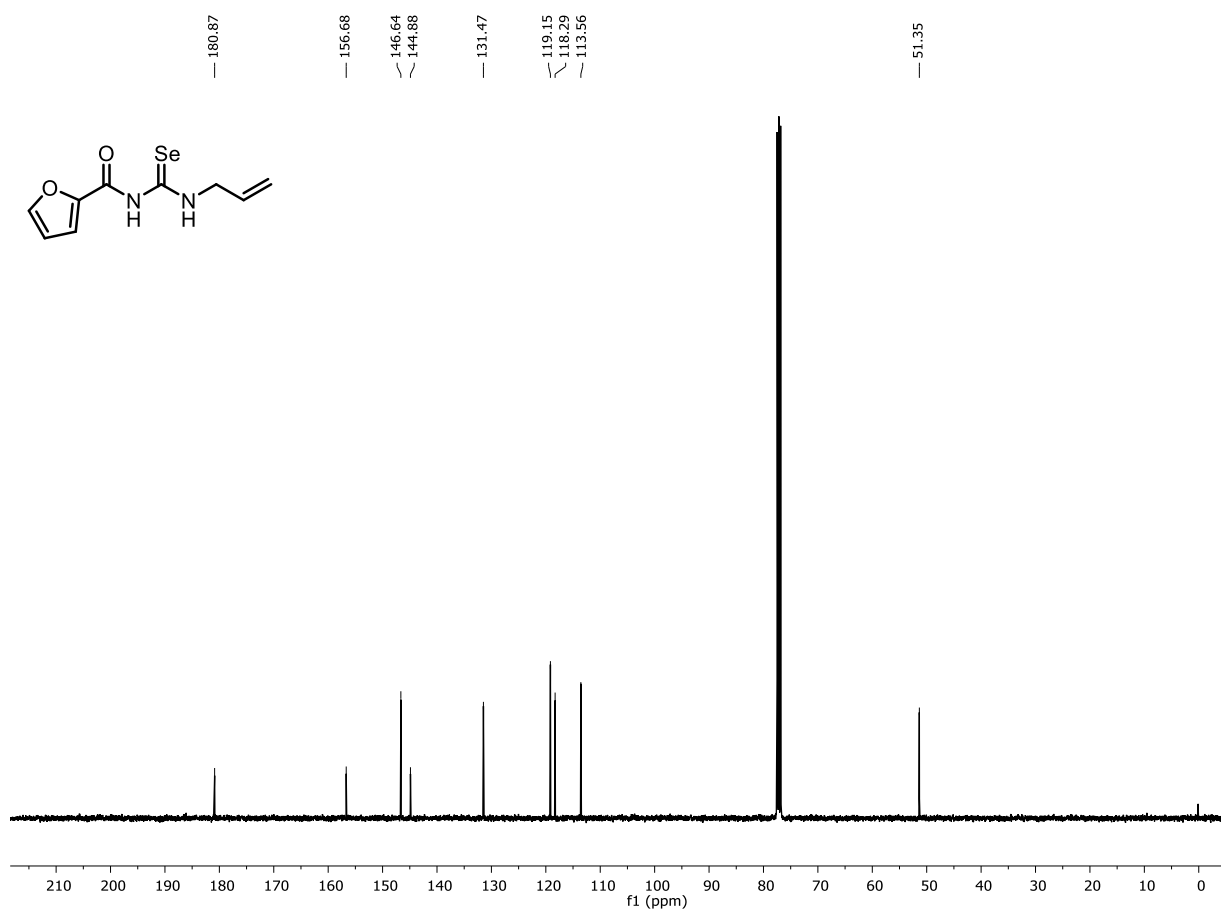

Figure S26.  $^{13}\text{C}$ -NMR spectrum of compound **1.II**.

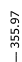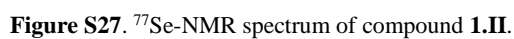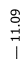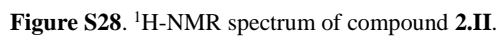

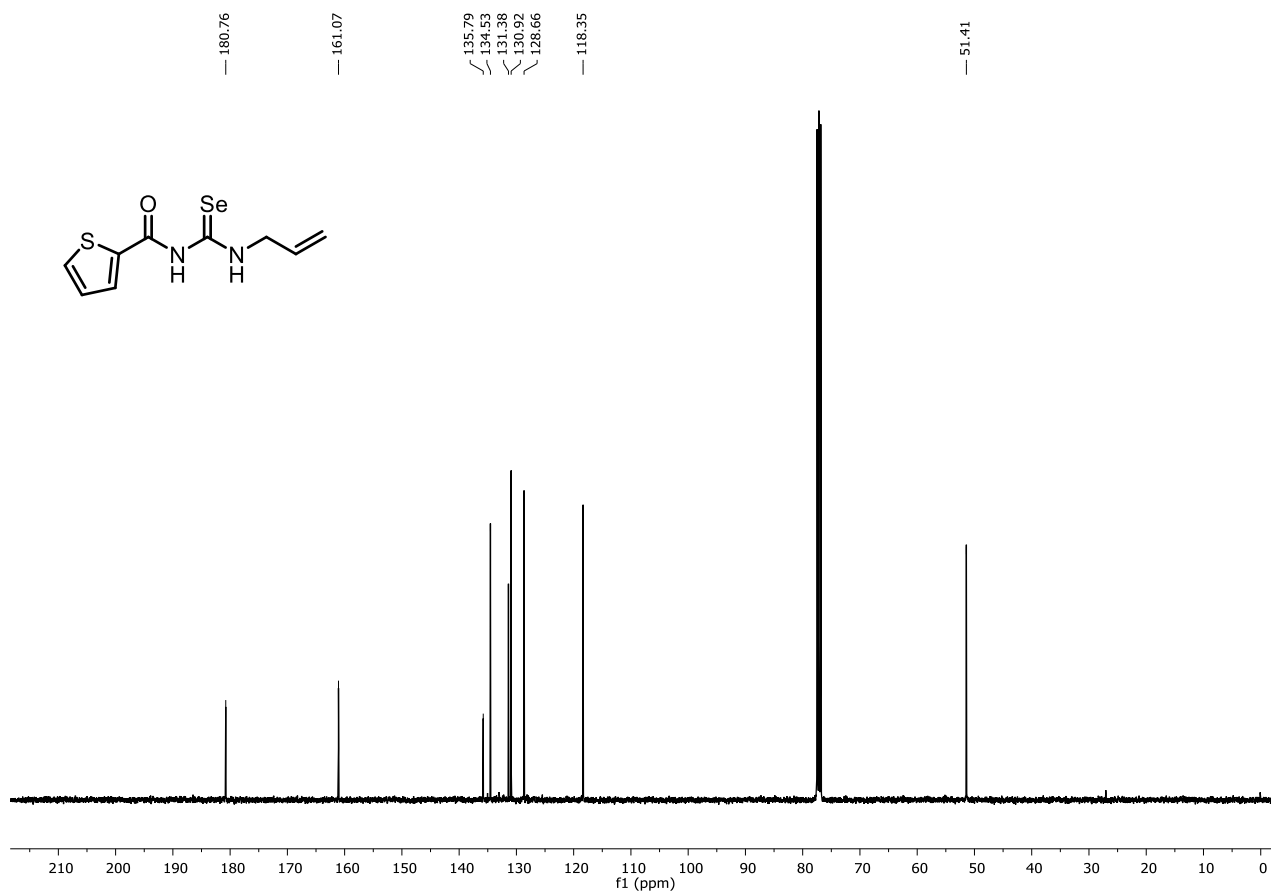

**Figure S29.** <sup>13</sup>C-NMR spectrum of compound **2.II**.

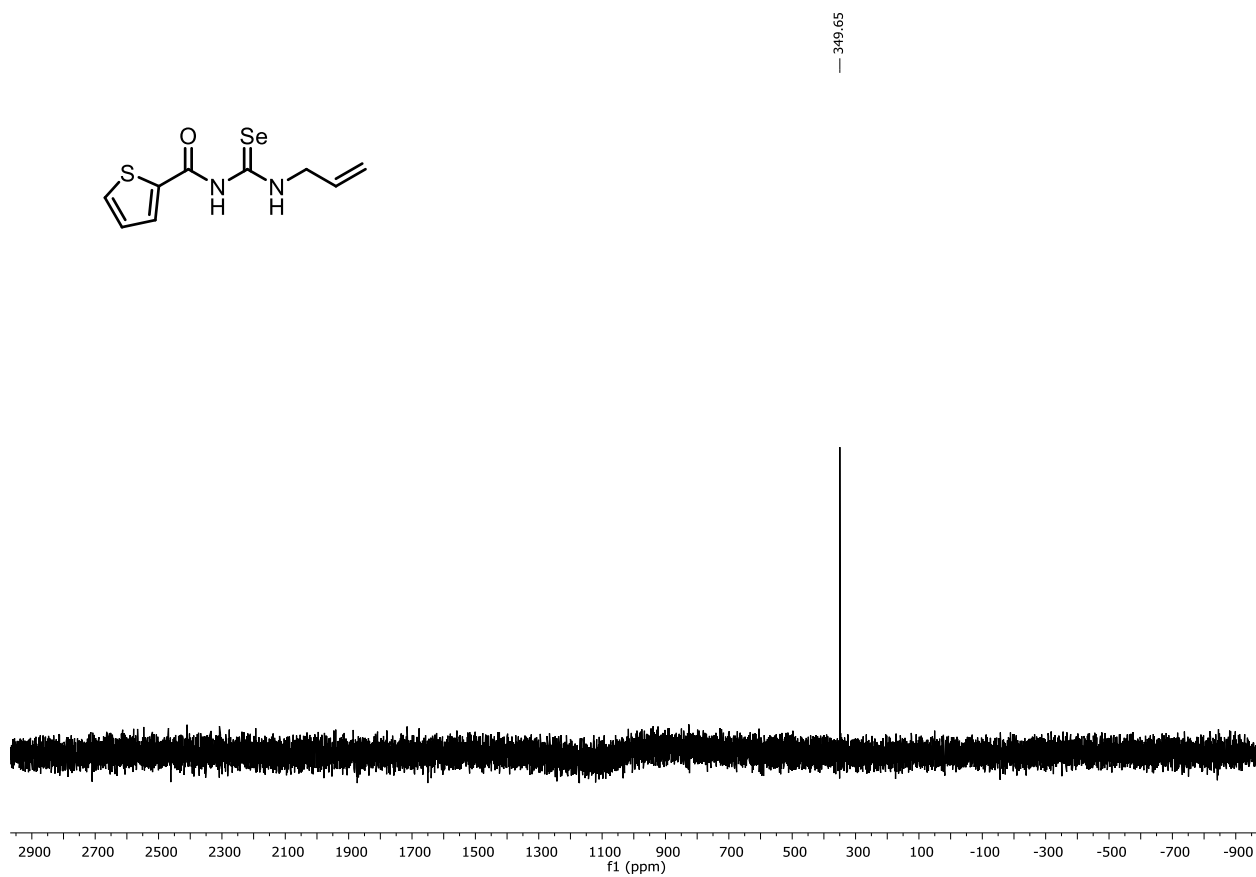

**Figure S30.** <sup>77</sup>Se-NMR spectrum of compound **2.II**.

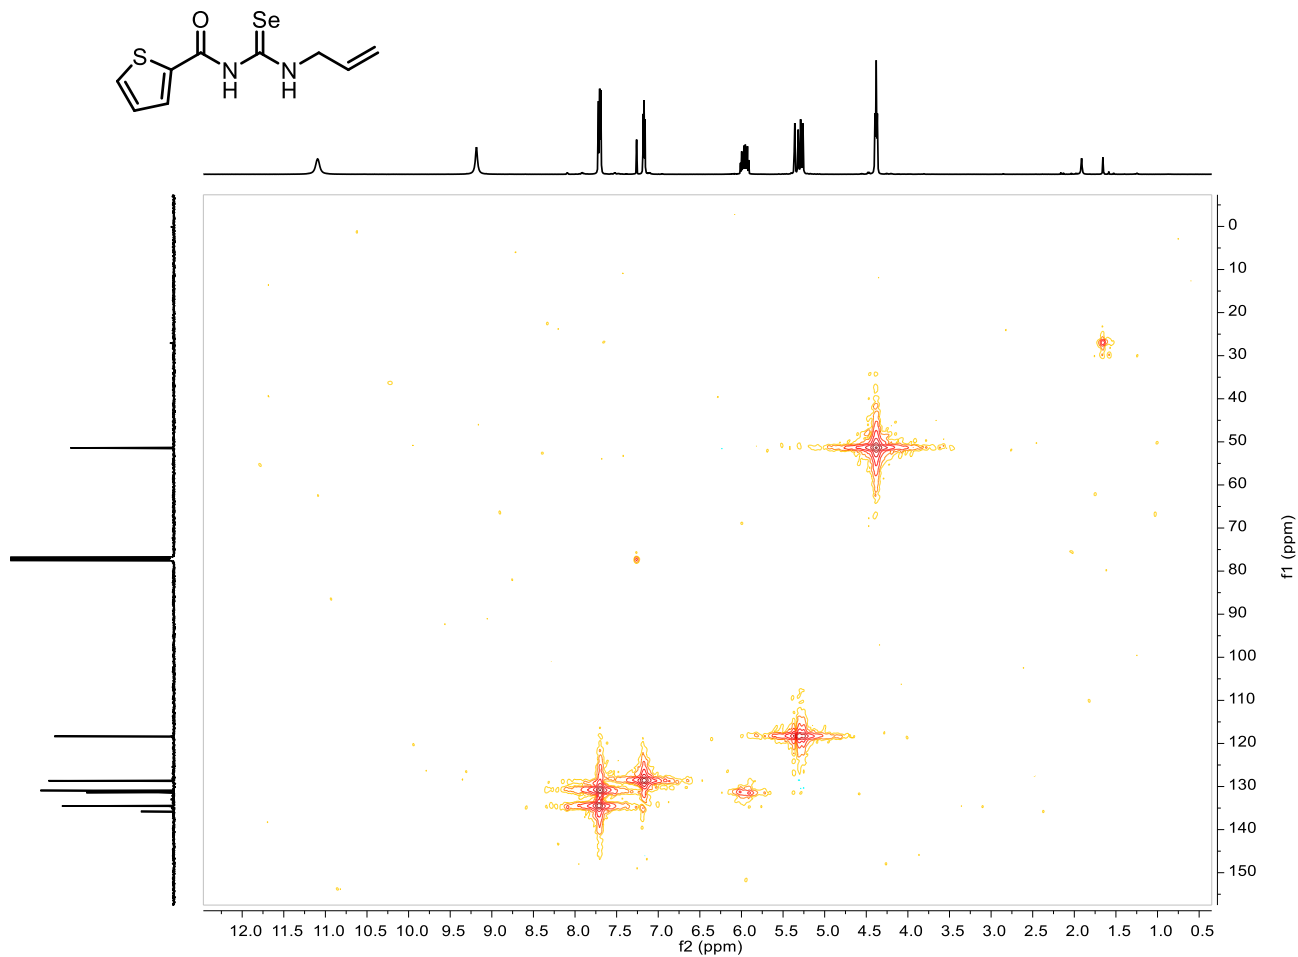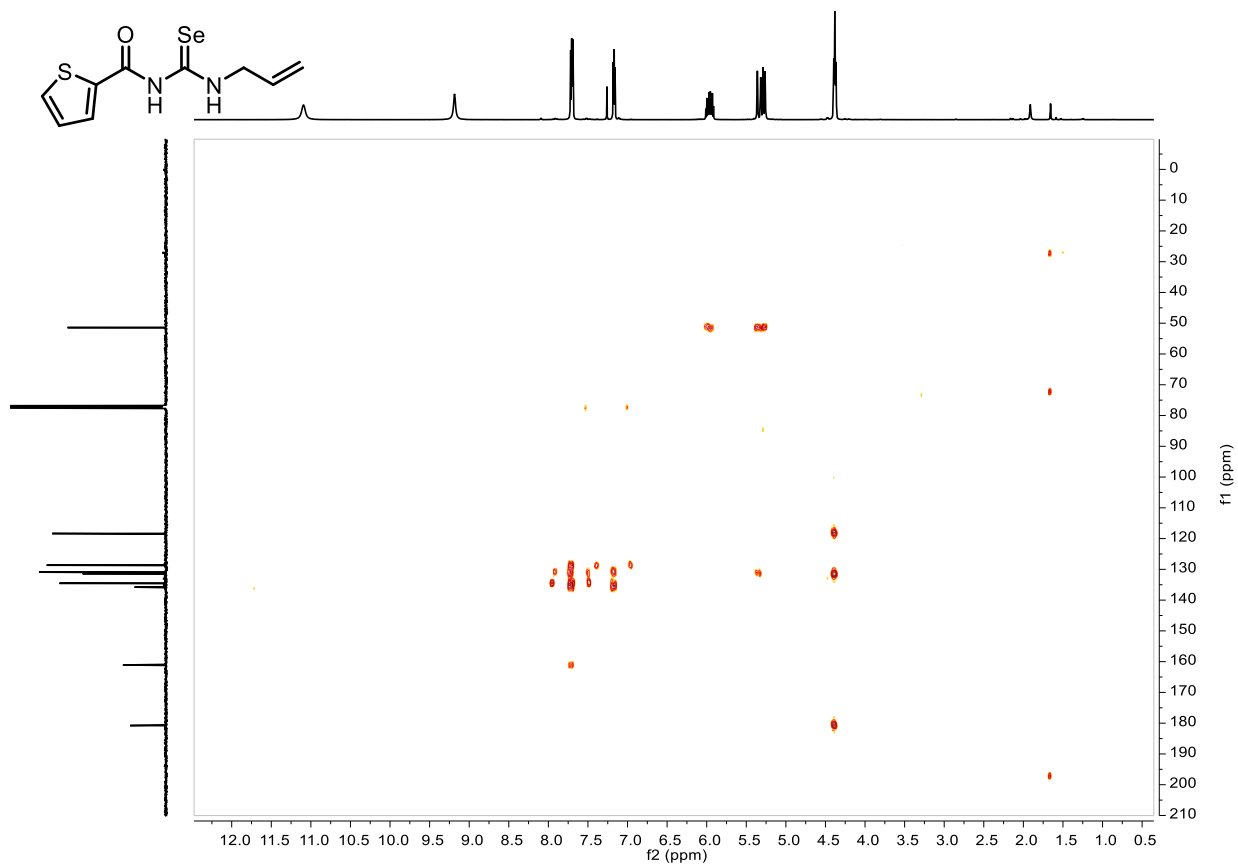



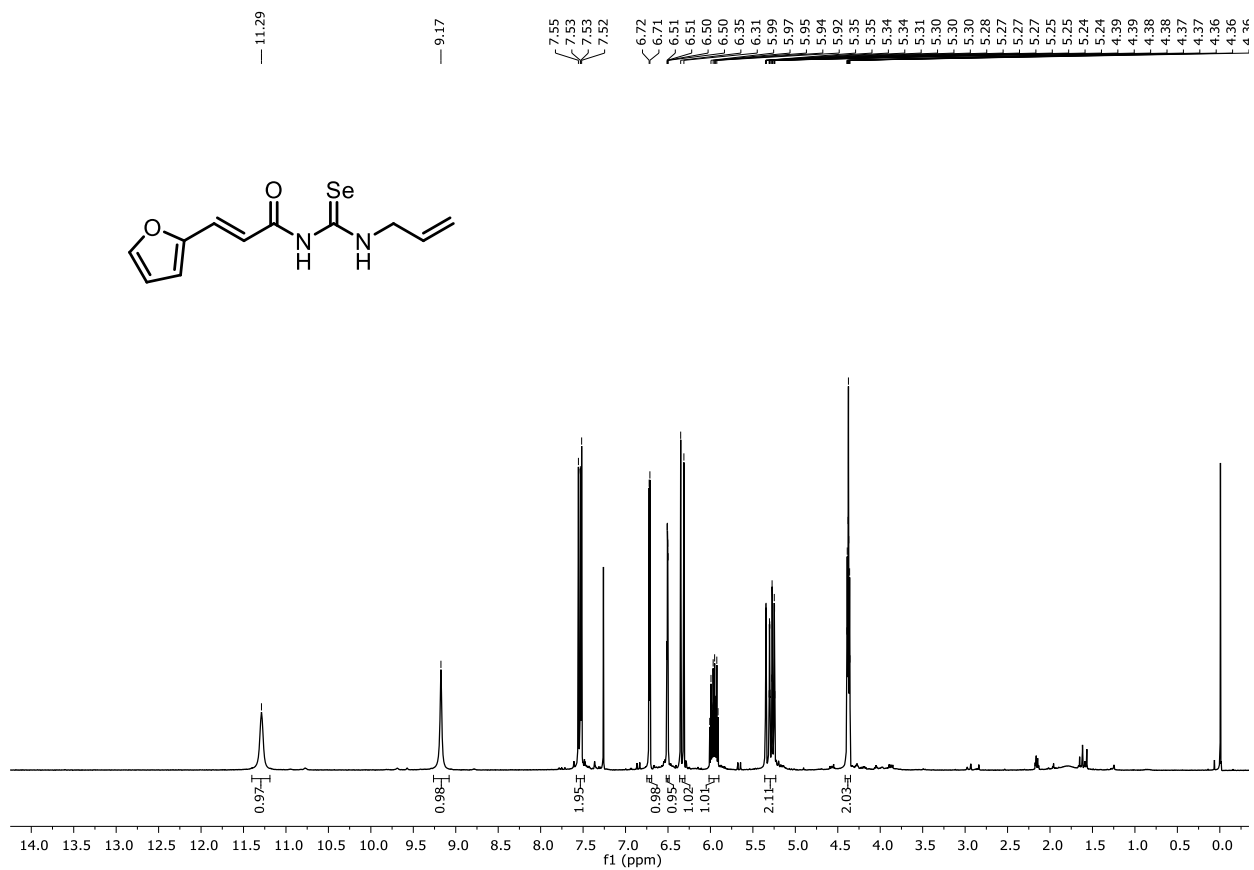

Figure S33. <sup>1</sup>H-NMR spectrum of compound 3.II.

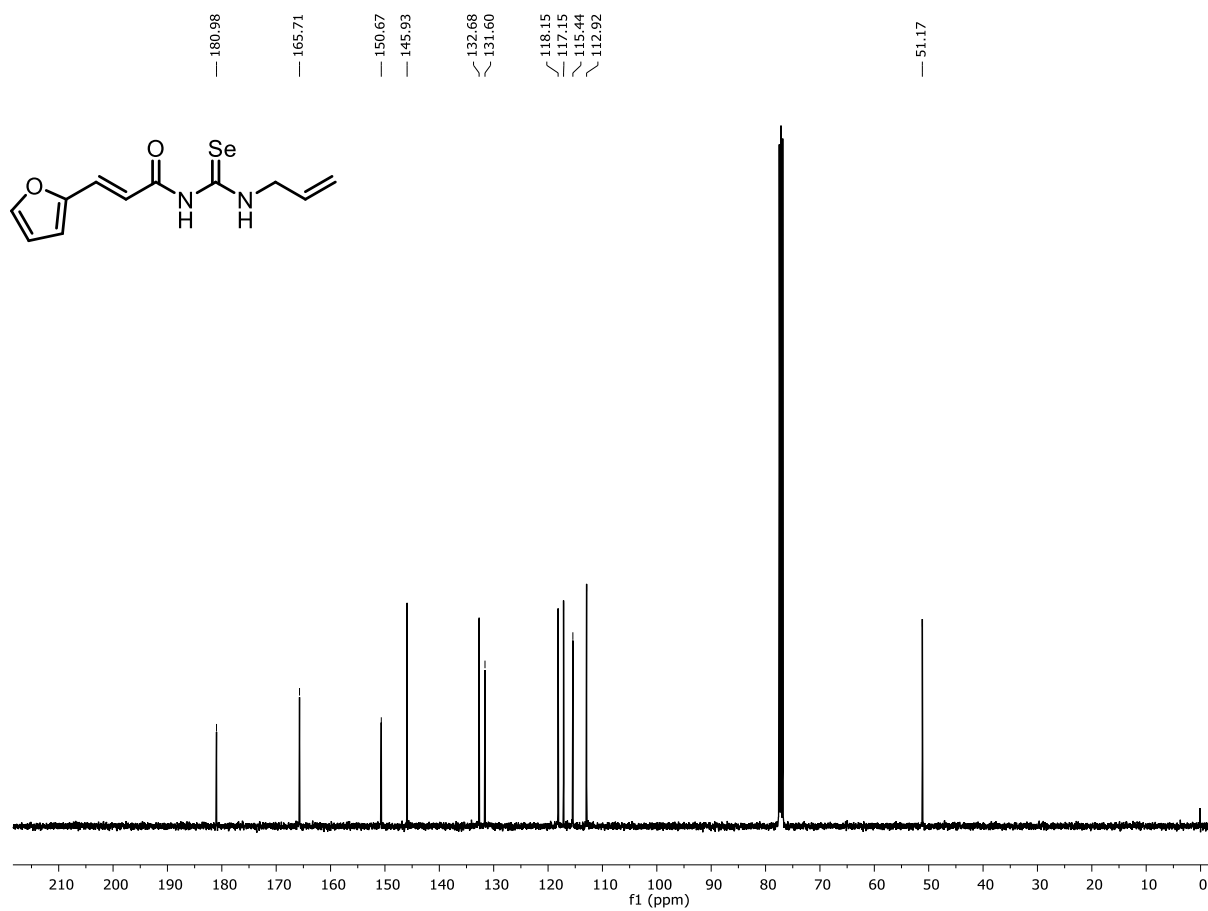

Figure S34. <sup>13</sup>C-NMR spectrum of compound 3.II.

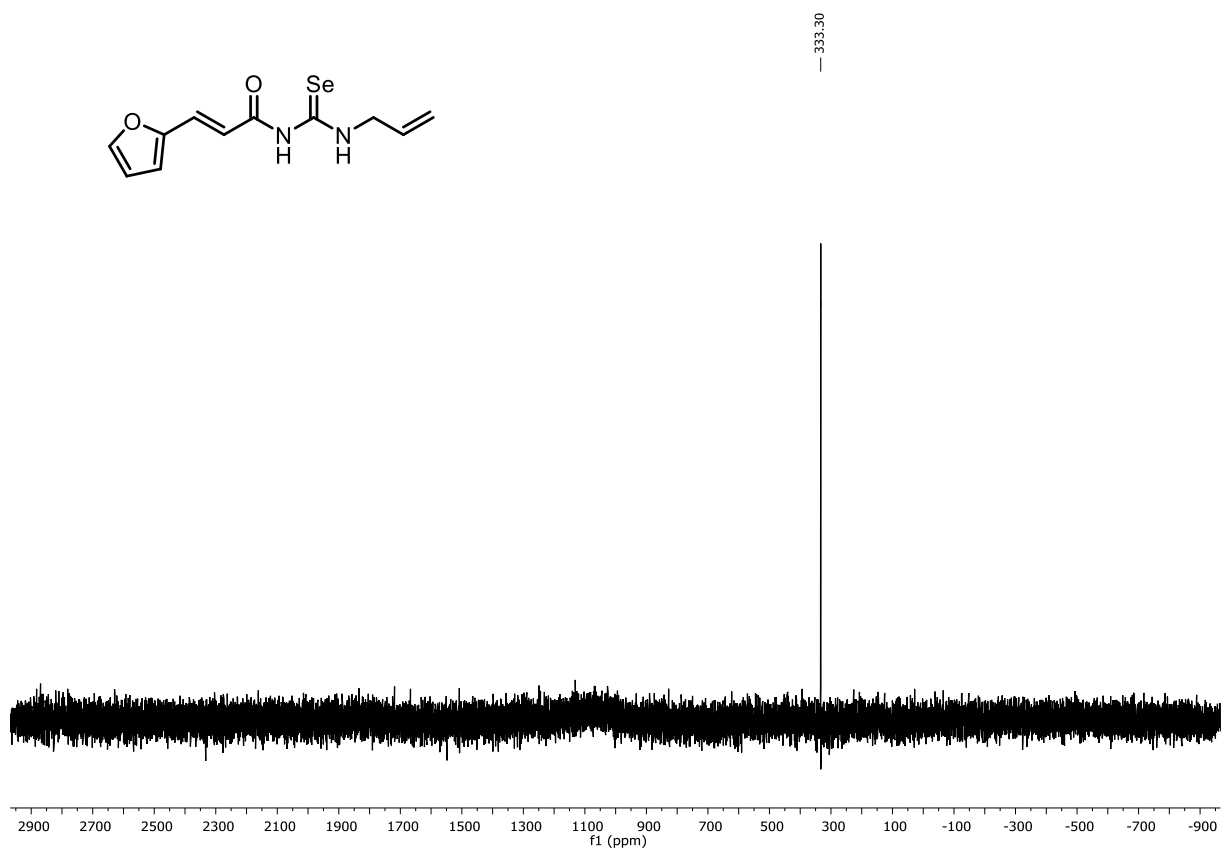

Figure S35.  $^{77}\text{Se}$ -NMR spectrum of compound 3.II.

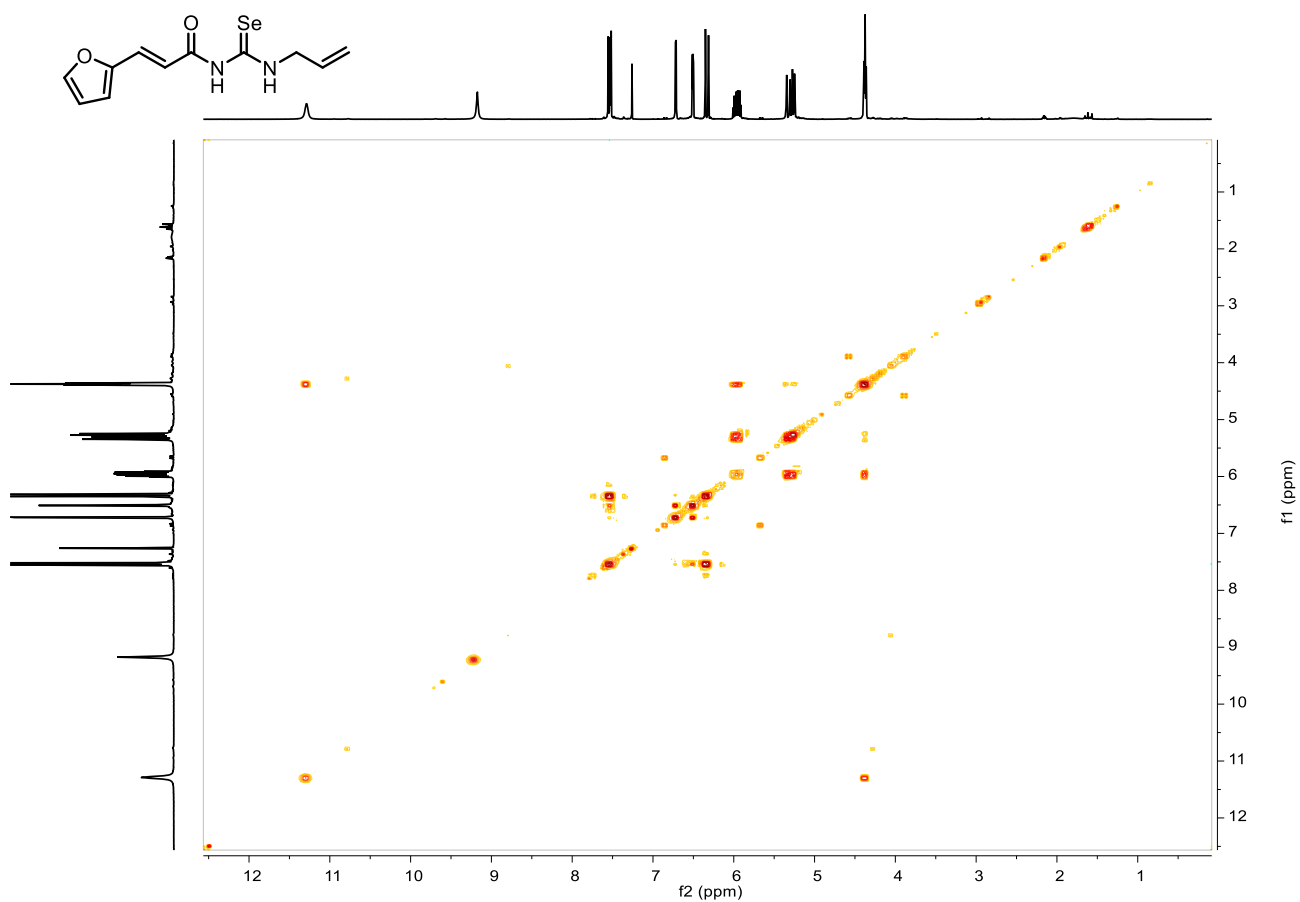

Figure S36. COSY-NMR spectrum of compound 3.II.

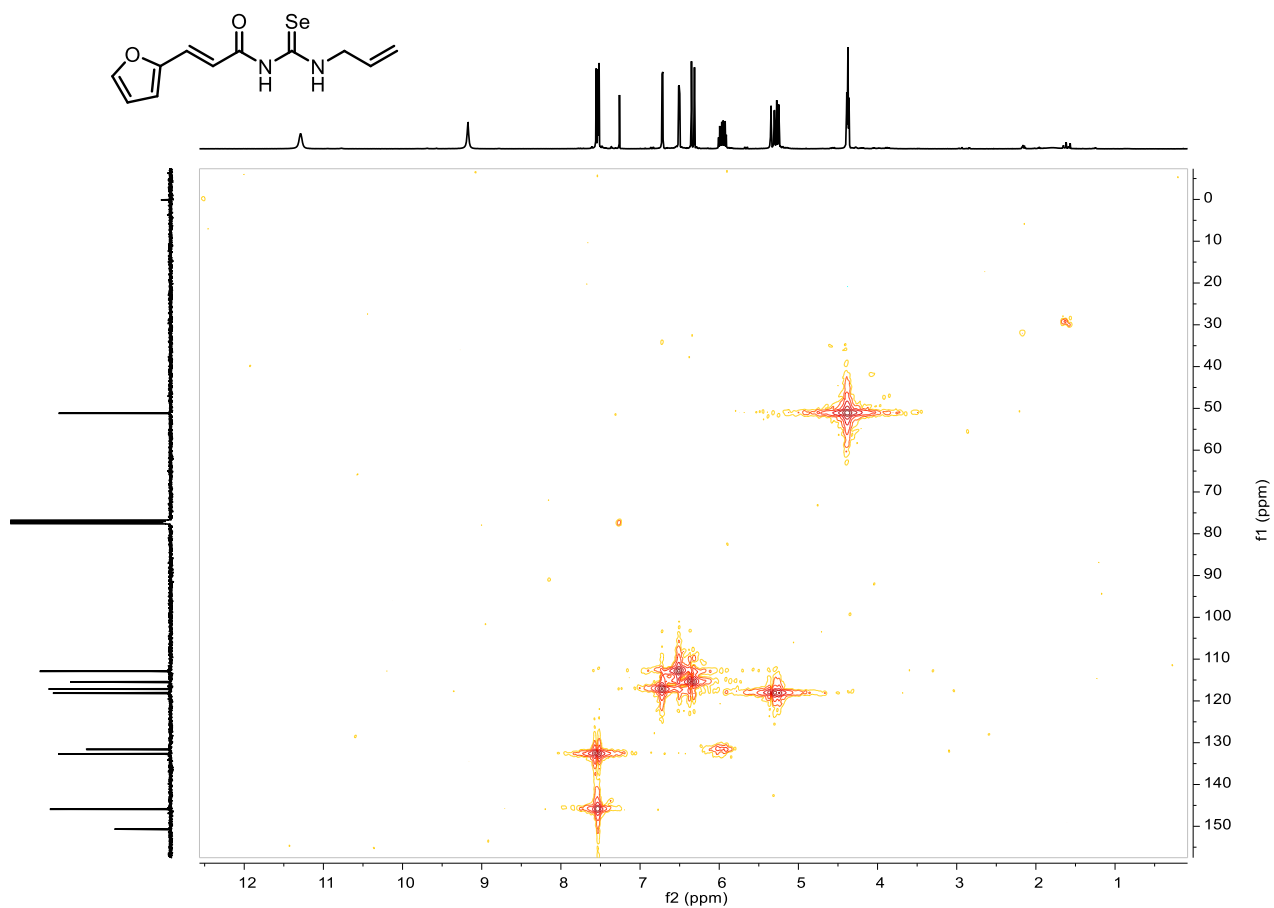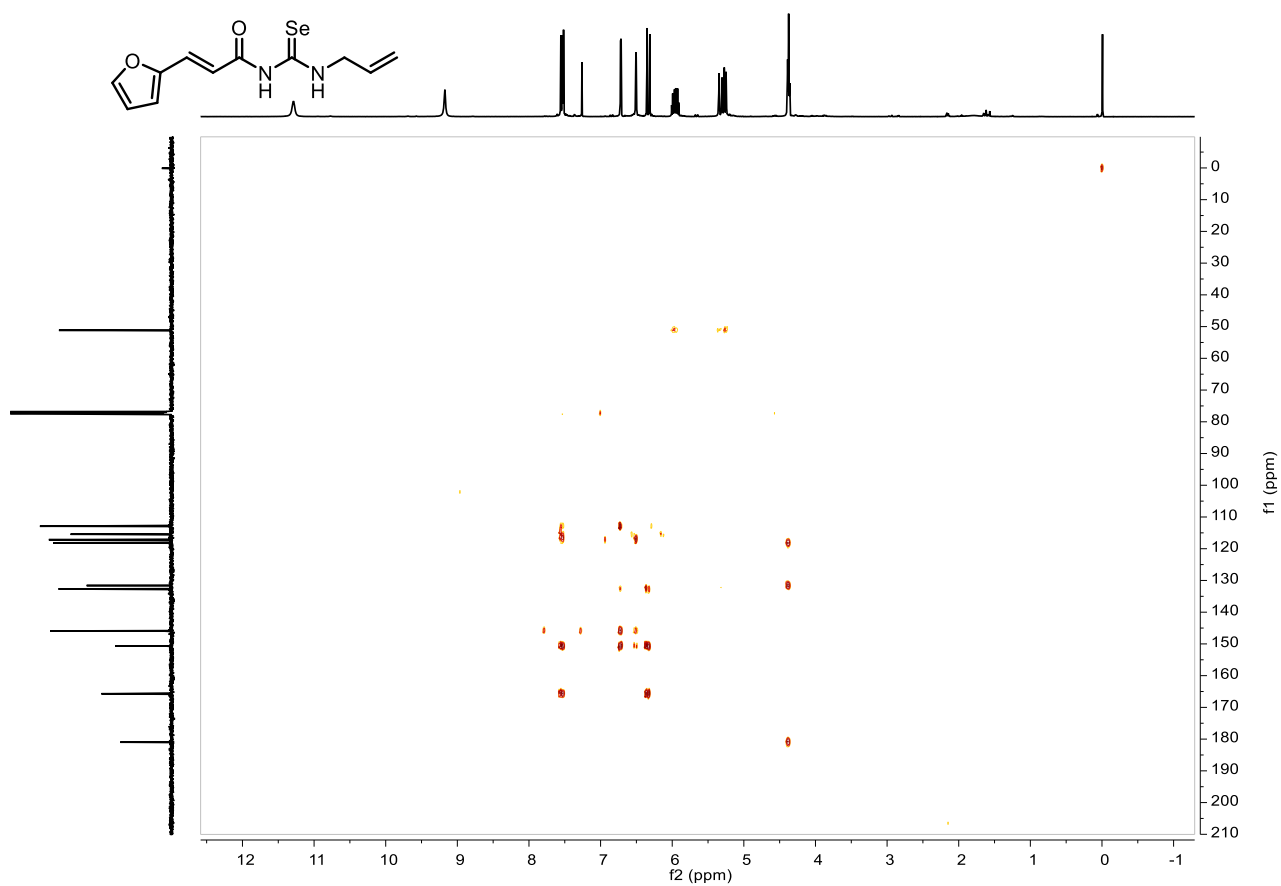

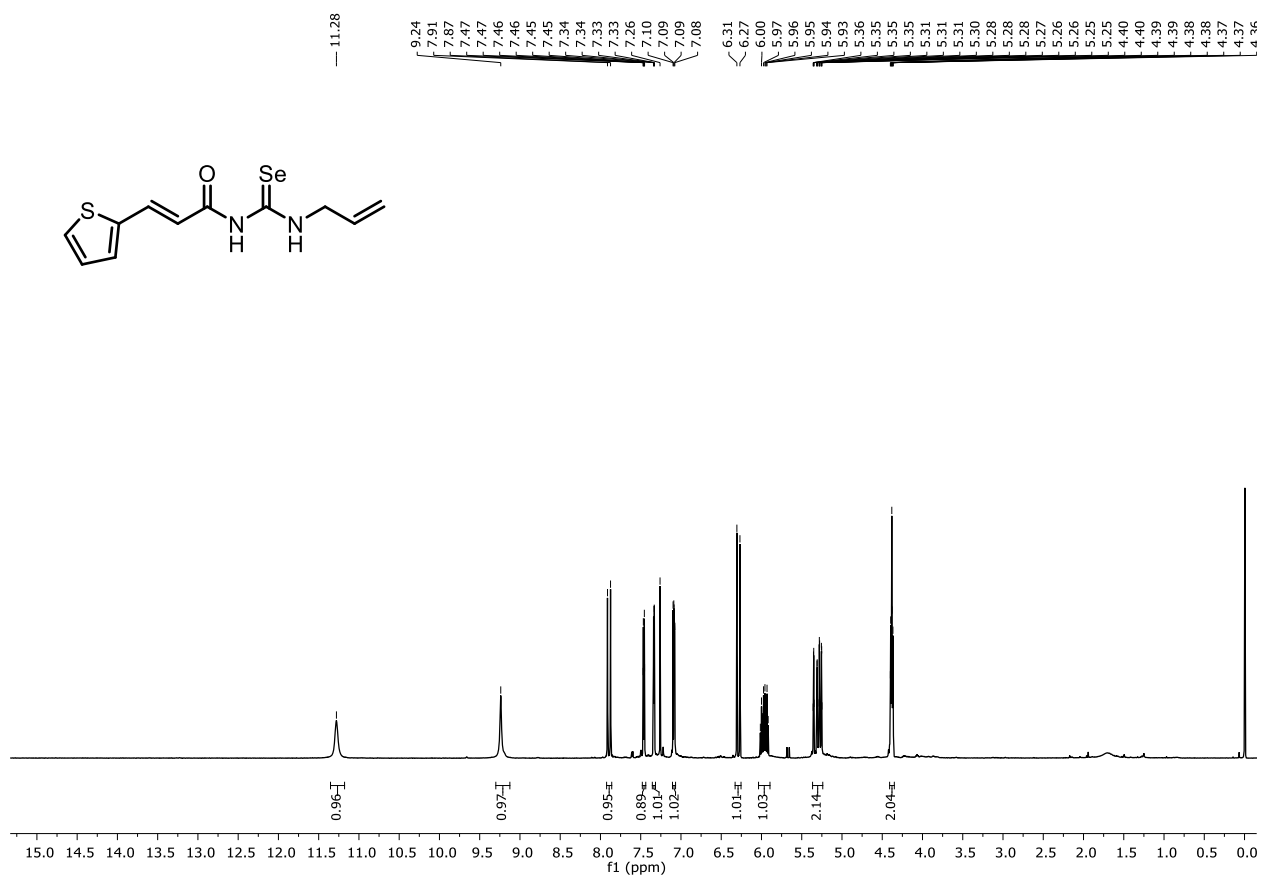

Figure S39. <sup>1</sup>H-NMR spectrum of compound **4.II**.

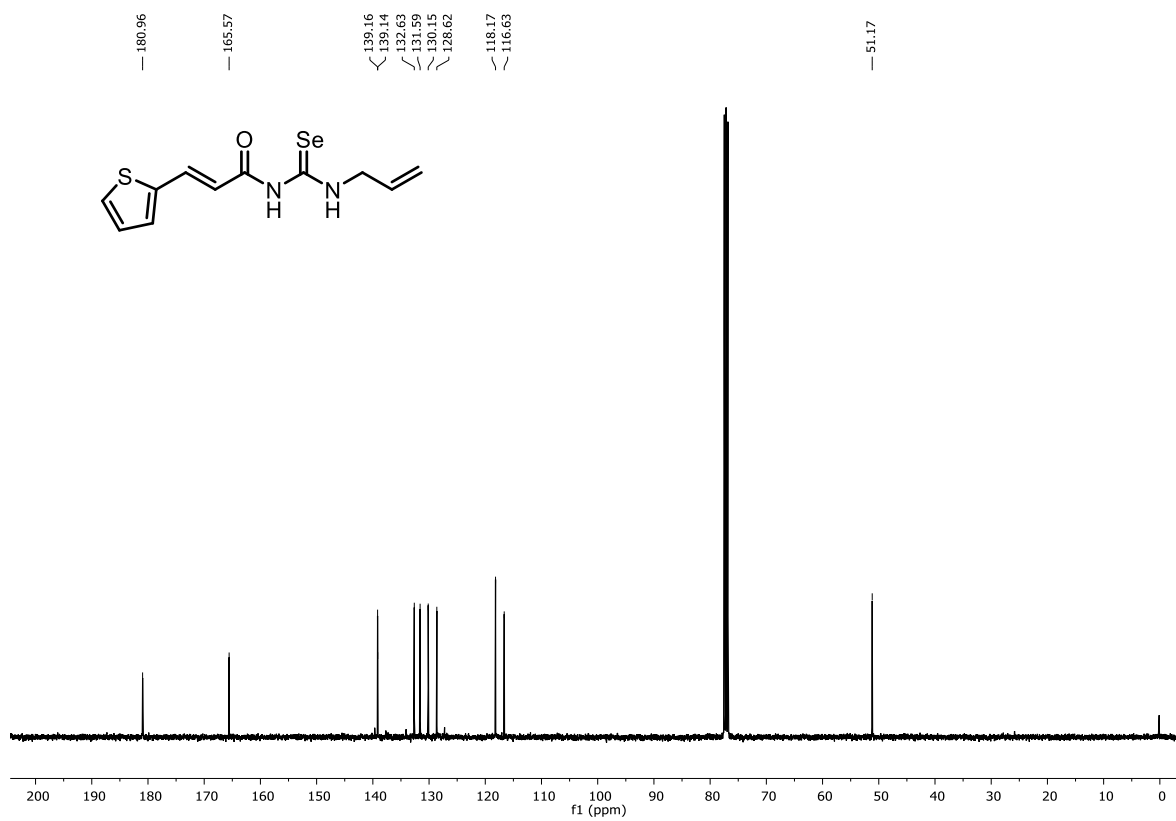

Figure S40. <sup>13</sup>C-NMR spectrum of compound **4.II**.

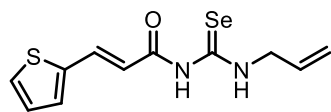

— 333.55

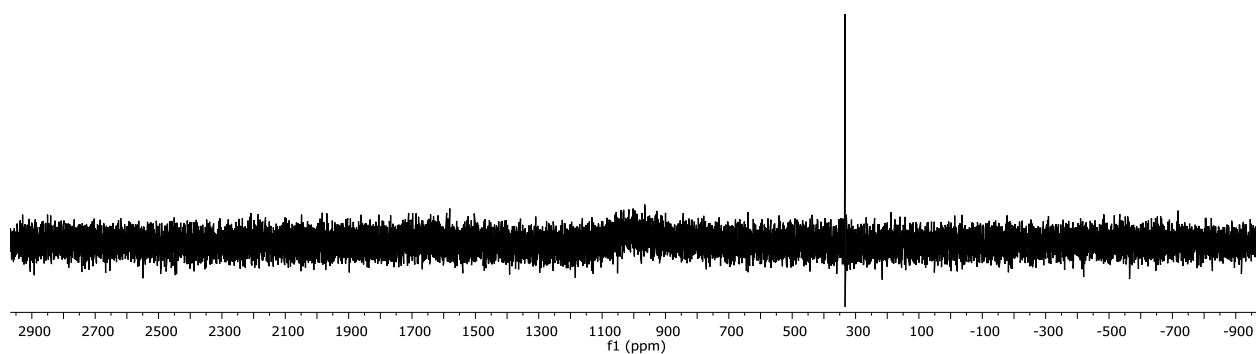

Figure S41.  $^{77}\text{Se}$ -NMR spectrum of compound **4.II**.

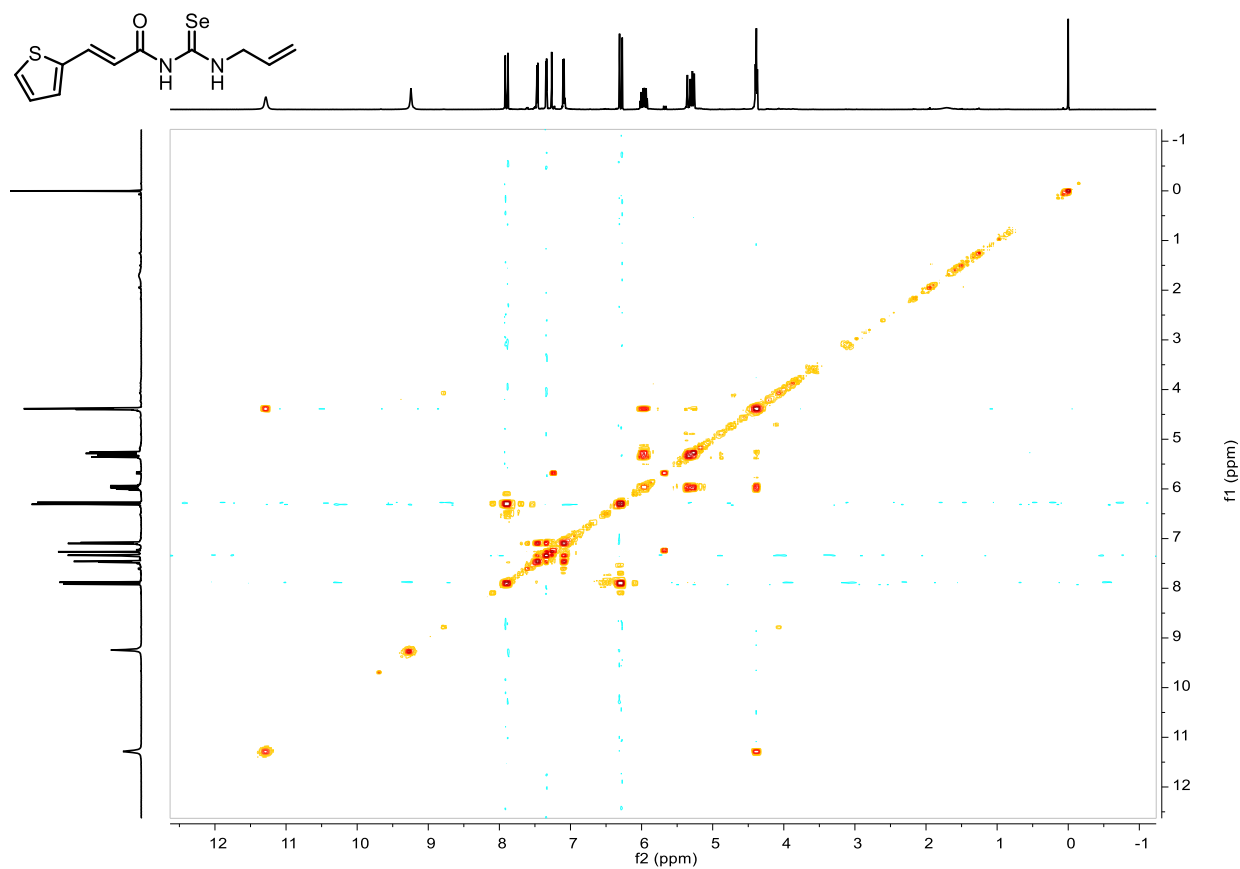

Figure S42. COSY-NMR spectrum of compound **4.II**

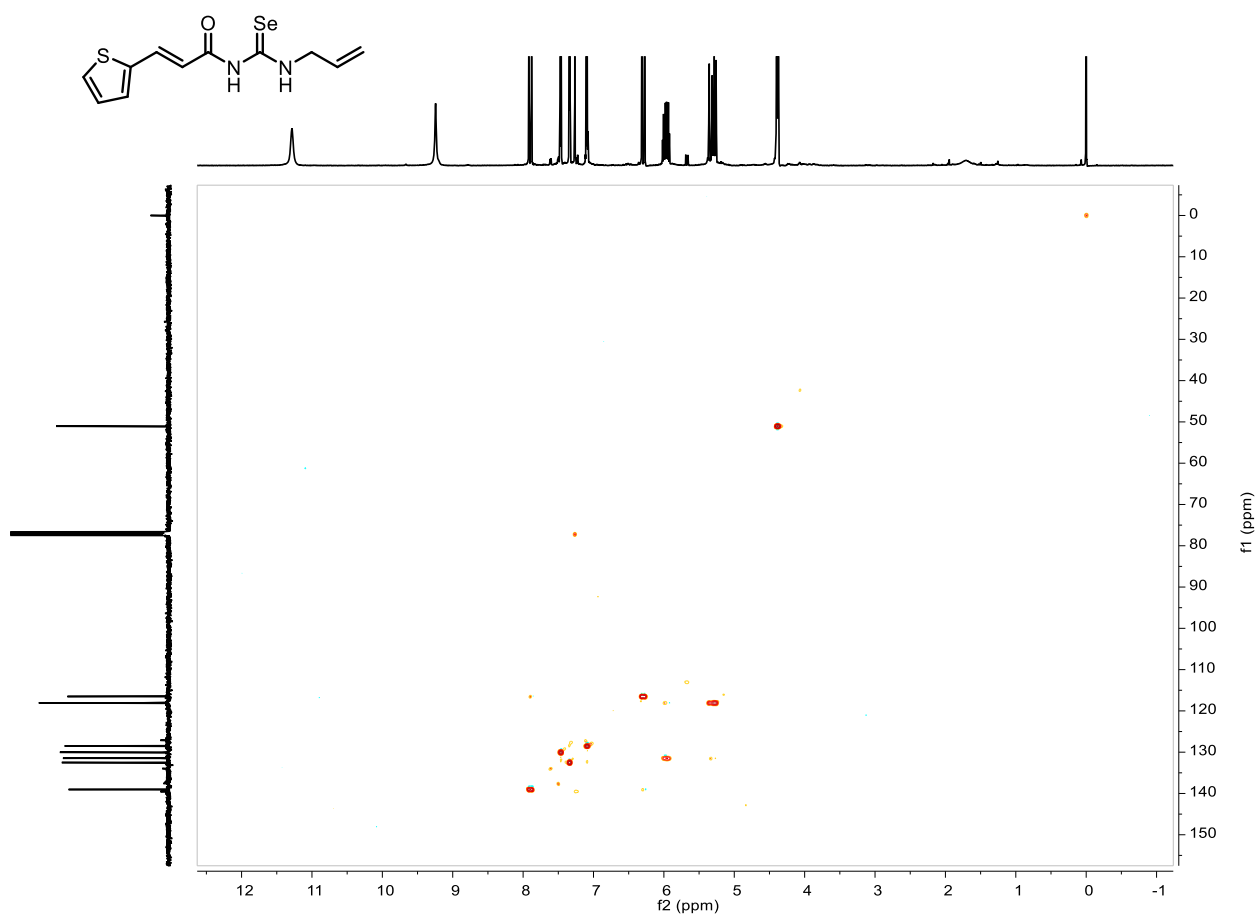

Figure S43. HSQC-NMR spectrum of compound 4.II

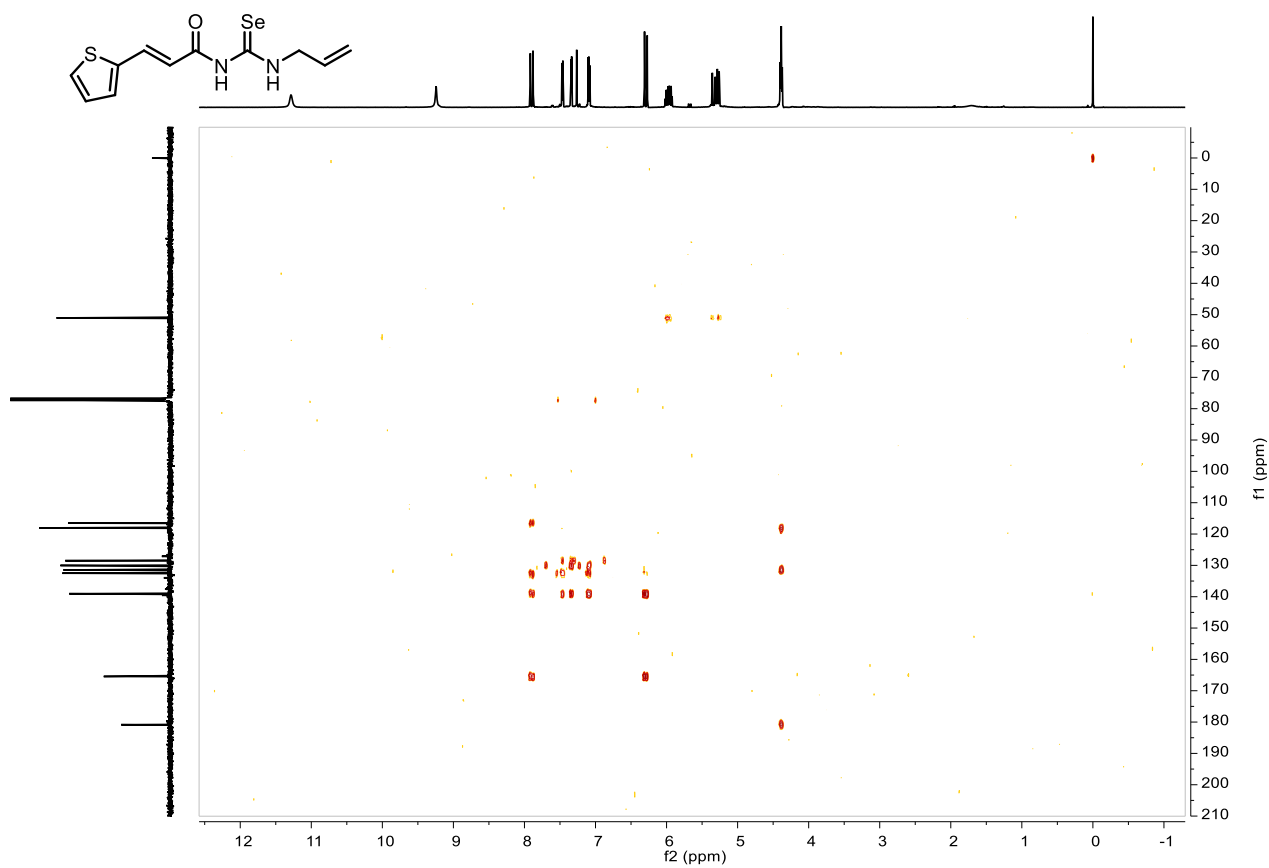

Figure S44. HMBC-NMR spectrum of compound 4.II

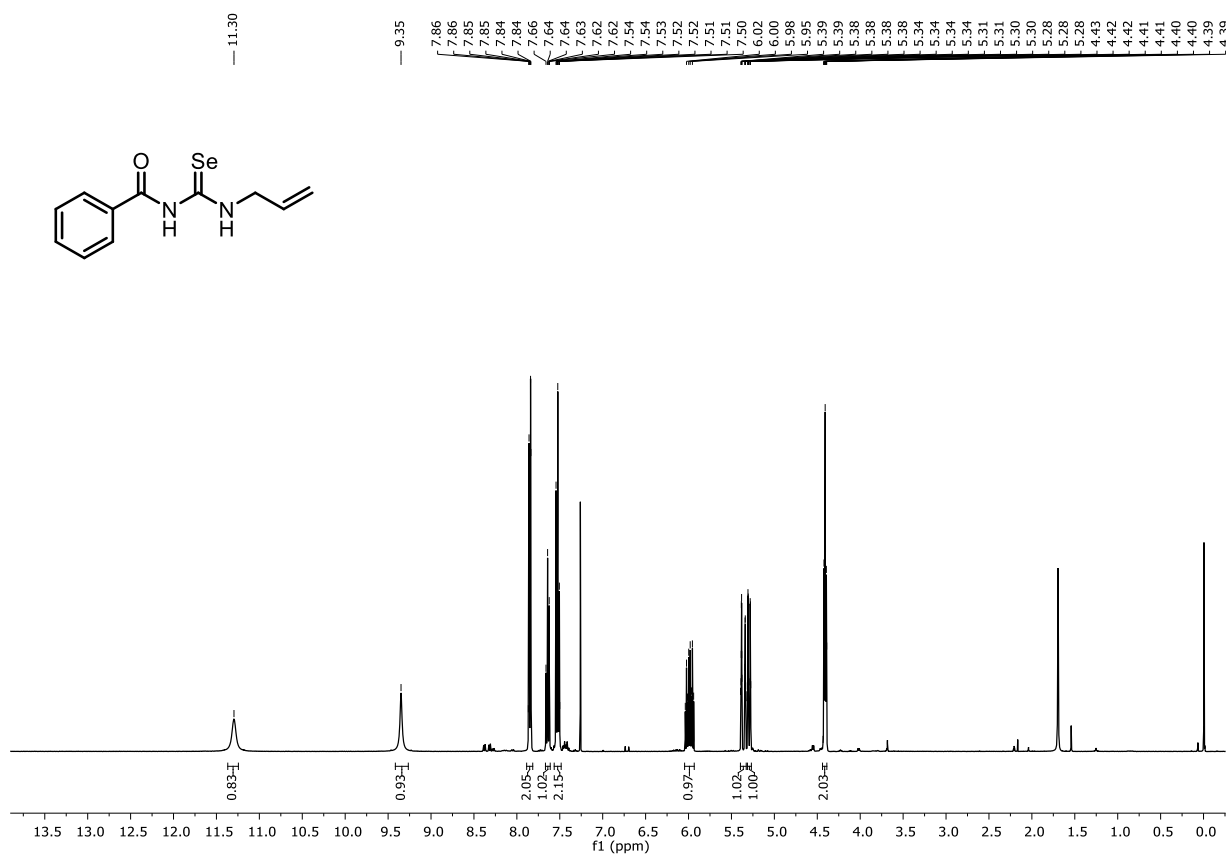

Figure S45.  $^1\text{H}$ -NMR spectrum of compound **5.II**.

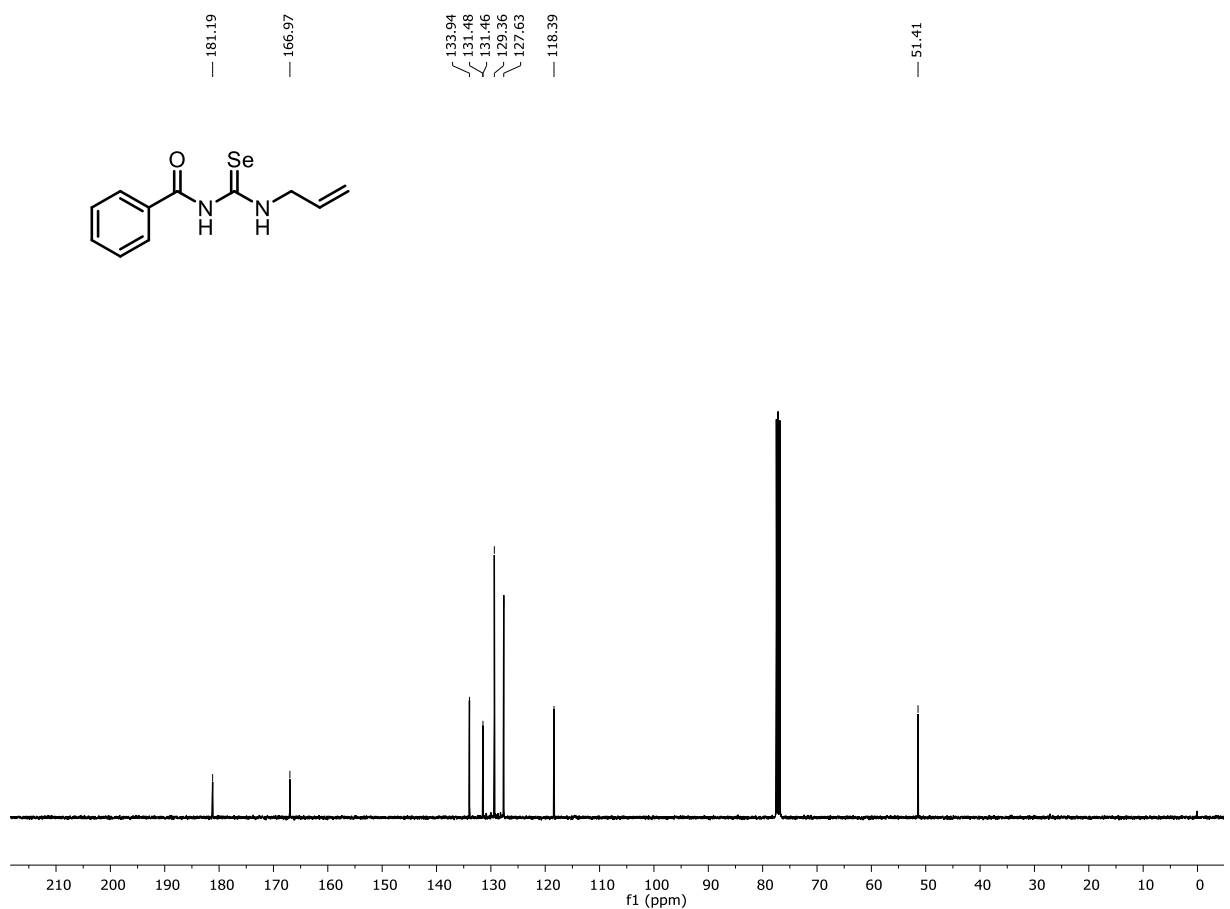

Figure S46.  $^{13}\text{C}$ -NMR spectrum of compound **5.II**.

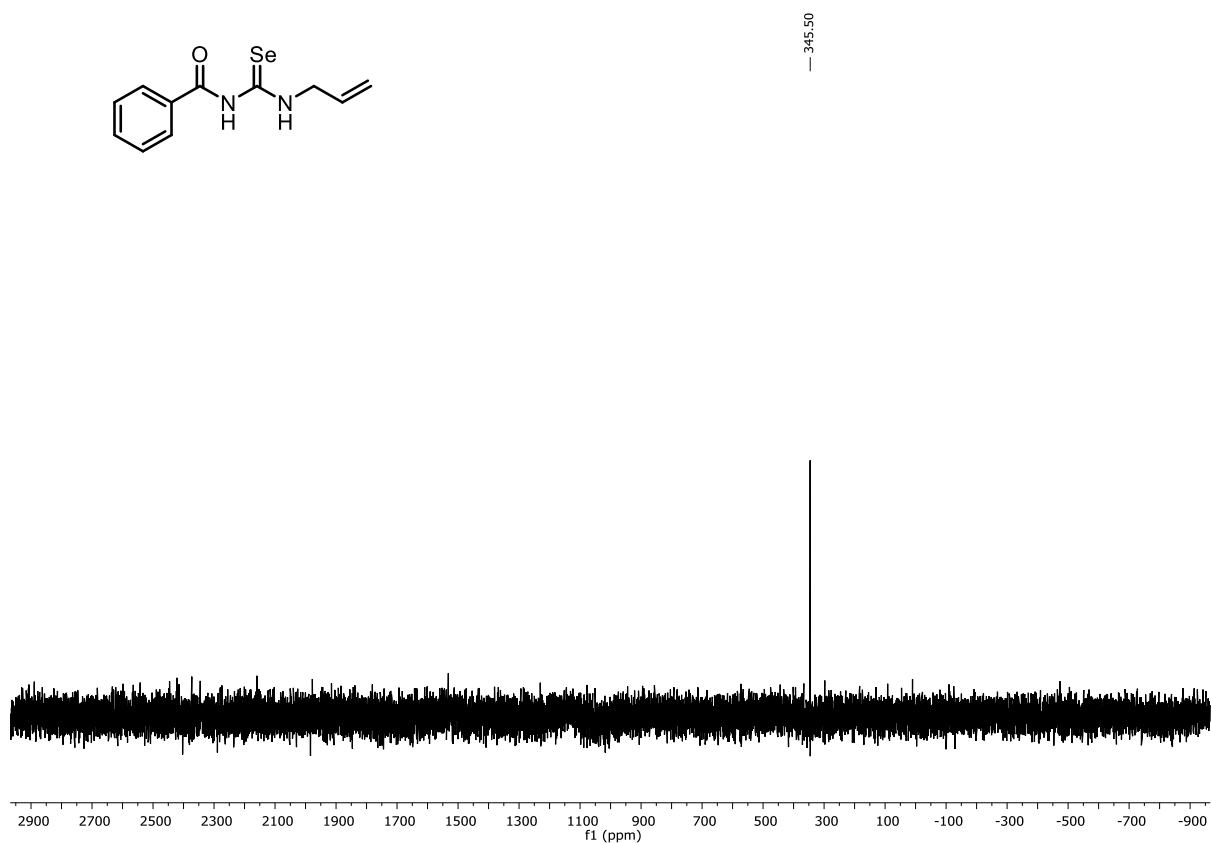

**Figure S47.**  $^{77}\text{Se}$ -NMR spectrum of compound **5.II**.

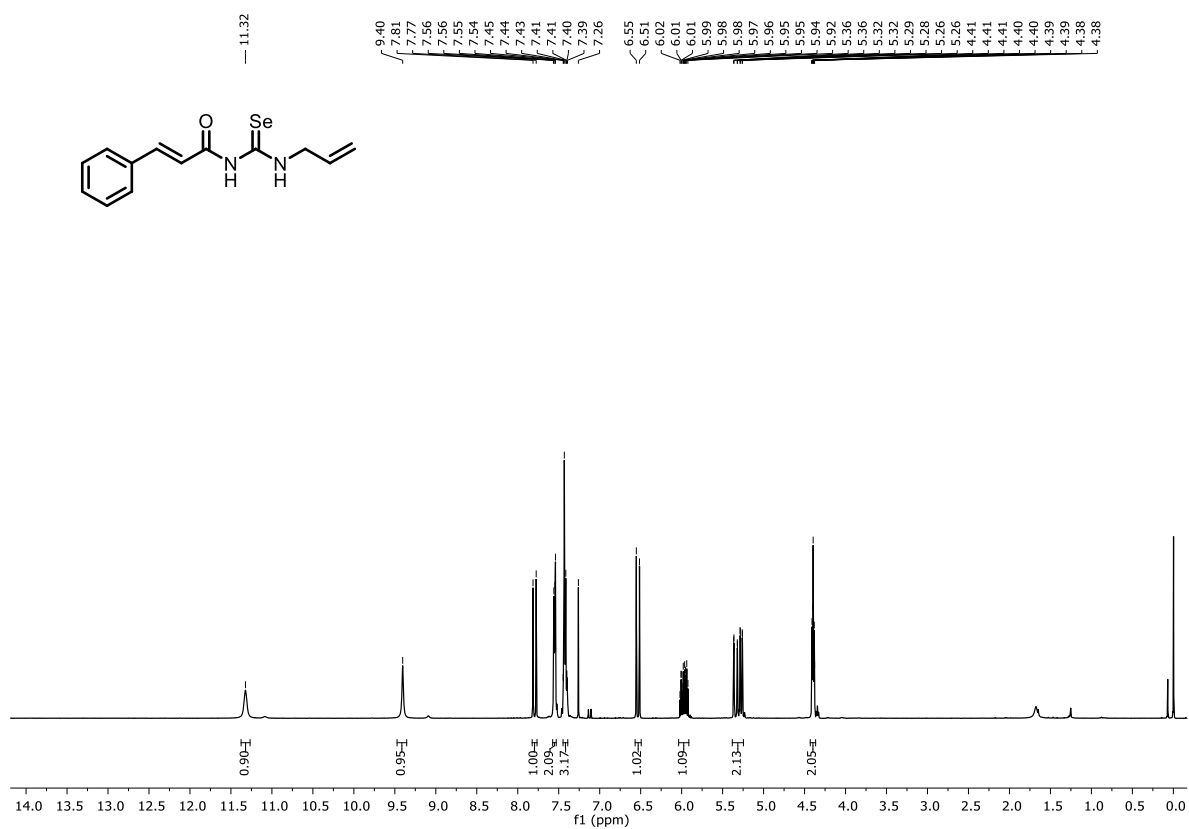

**Figure S48.**  $^1\text{H}$ -NMR spectrum of compound **6.II**.



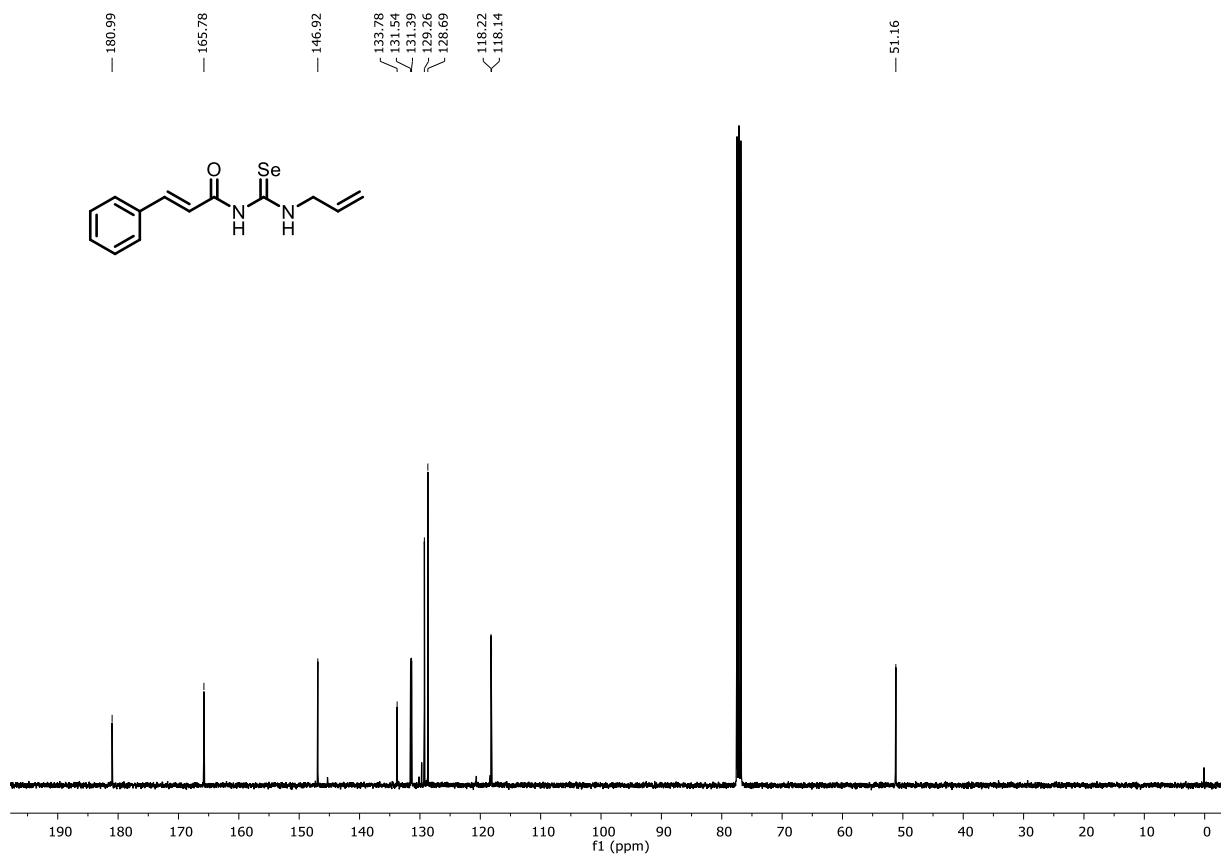

Figure S49. <sup>13</sup>C-NMR spectrum of compound **6.II**.

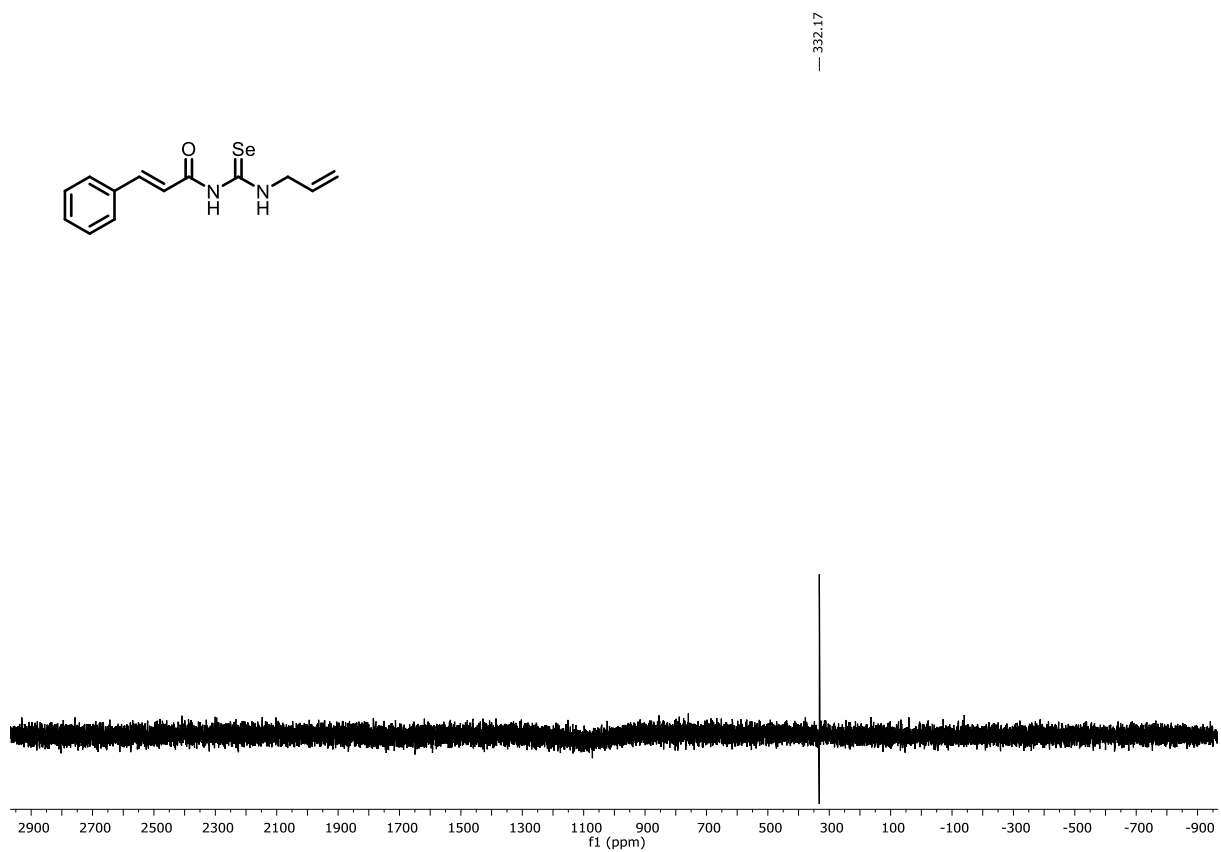

Figure S50. <sup>77</sup>Se-NMR spectrum of compound **6.II**.

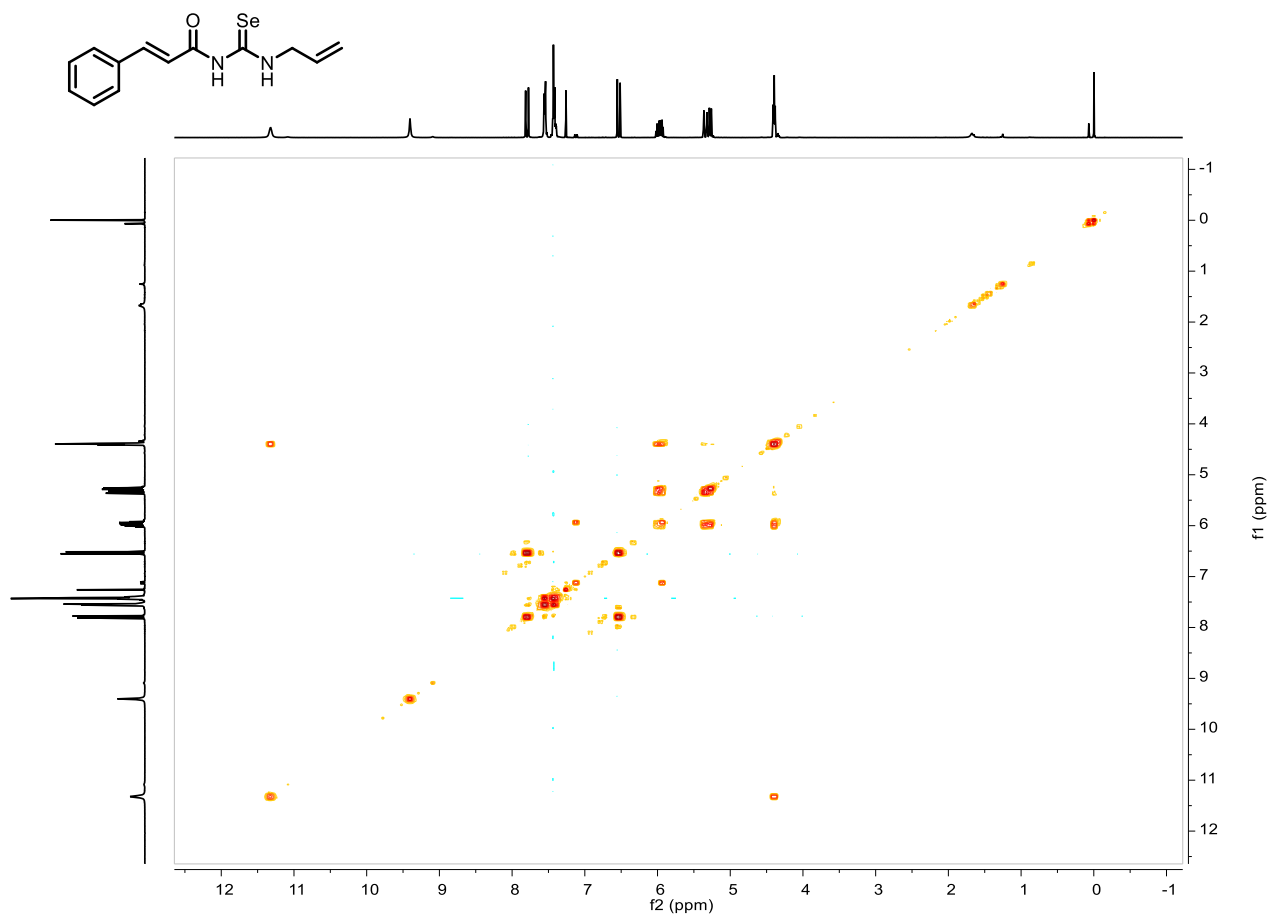

Figure S51. COSY-NMR spectrum of compound **6.II**.

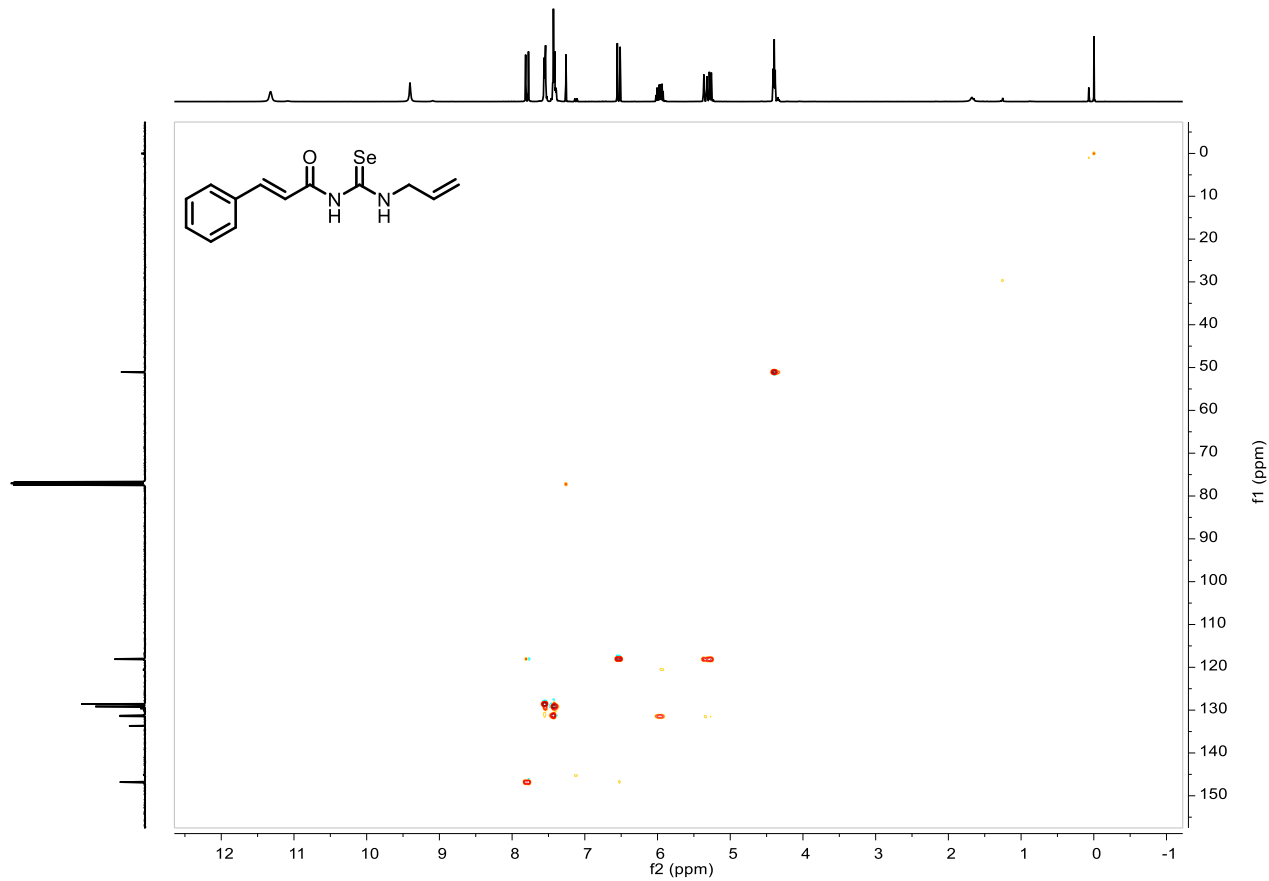

Figure S52. HSQC-NMR spectrum of compound **6.II**.

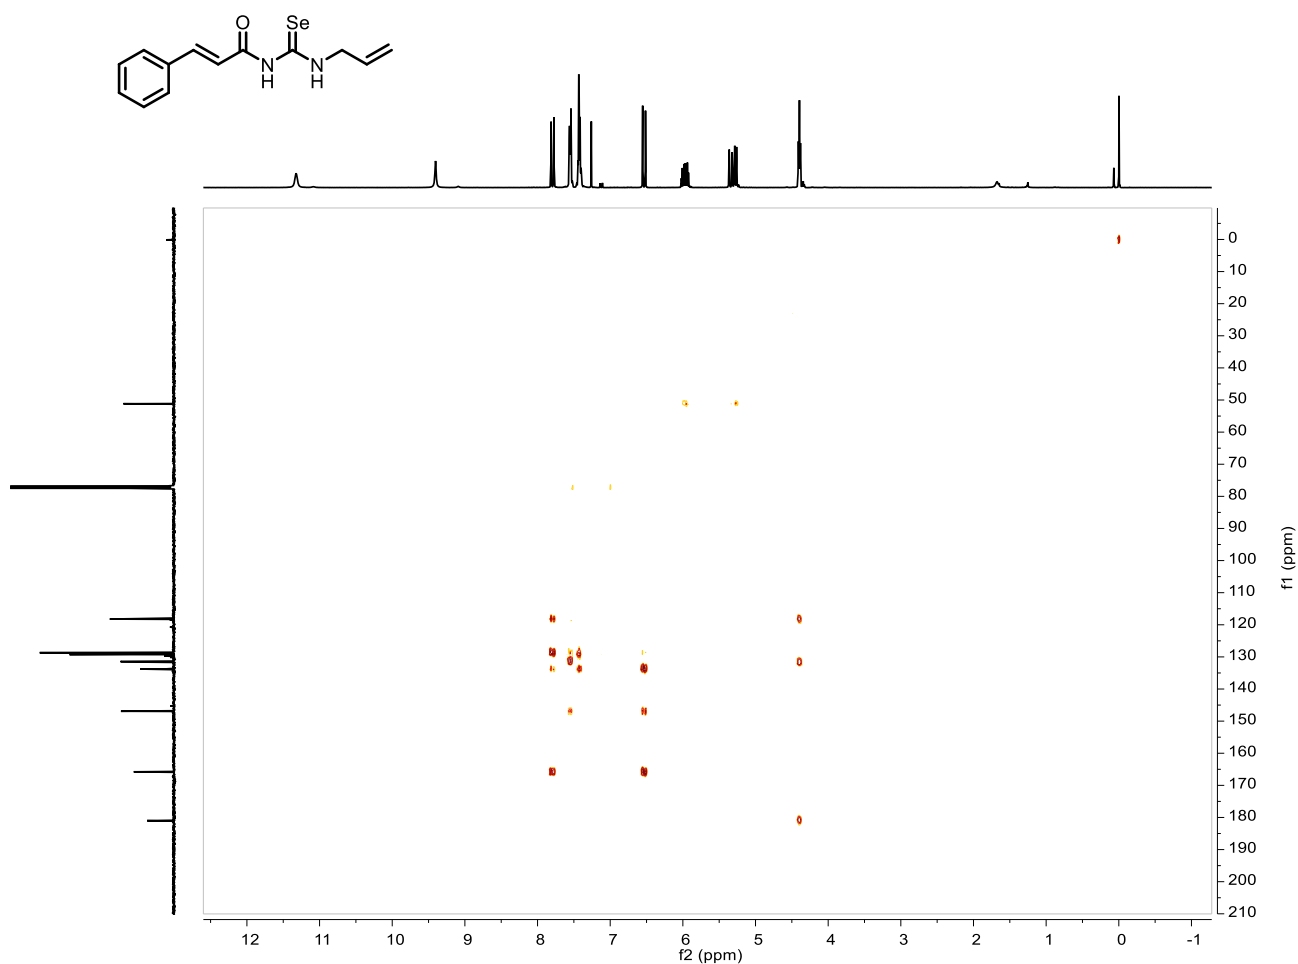

Figure S53. HMBC-NMR spectrum of compound **6.II**.

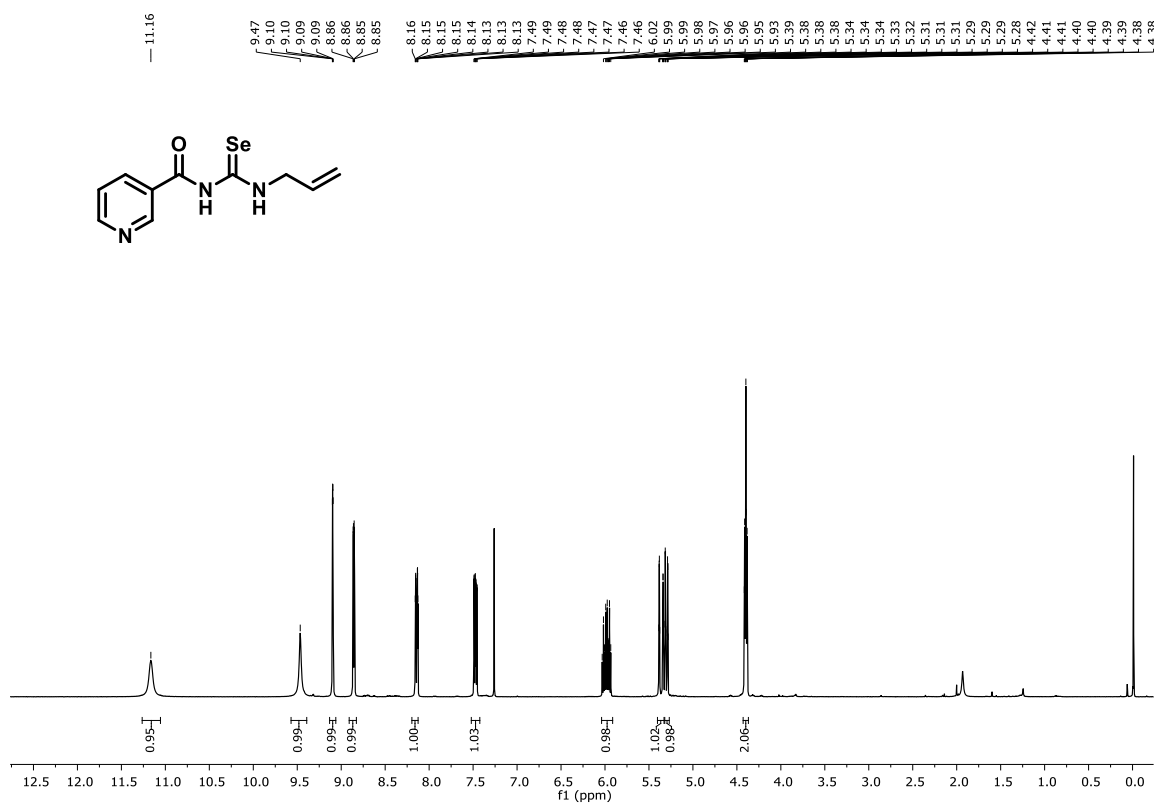

Figure S54.  $^1\text{H}$ -NMR spectrum of compound **7.II**.

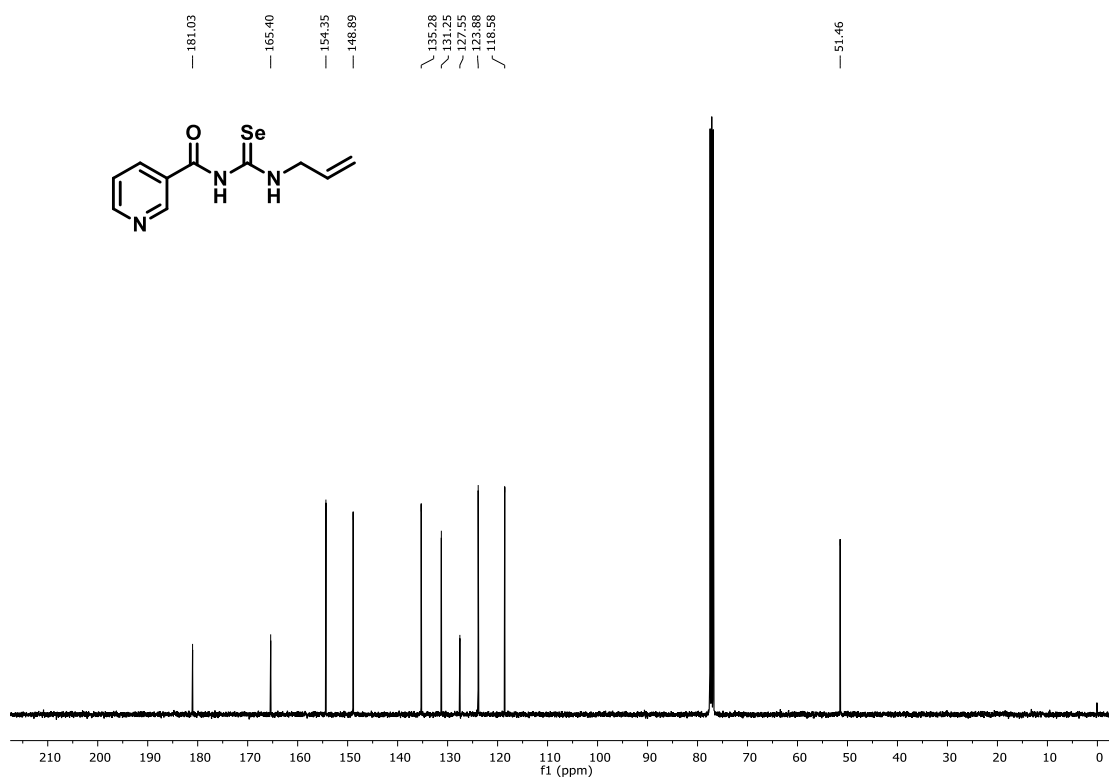

Figure S55.  $^{13}\text{C}$ -NMR spectrum of compound **7.II**.

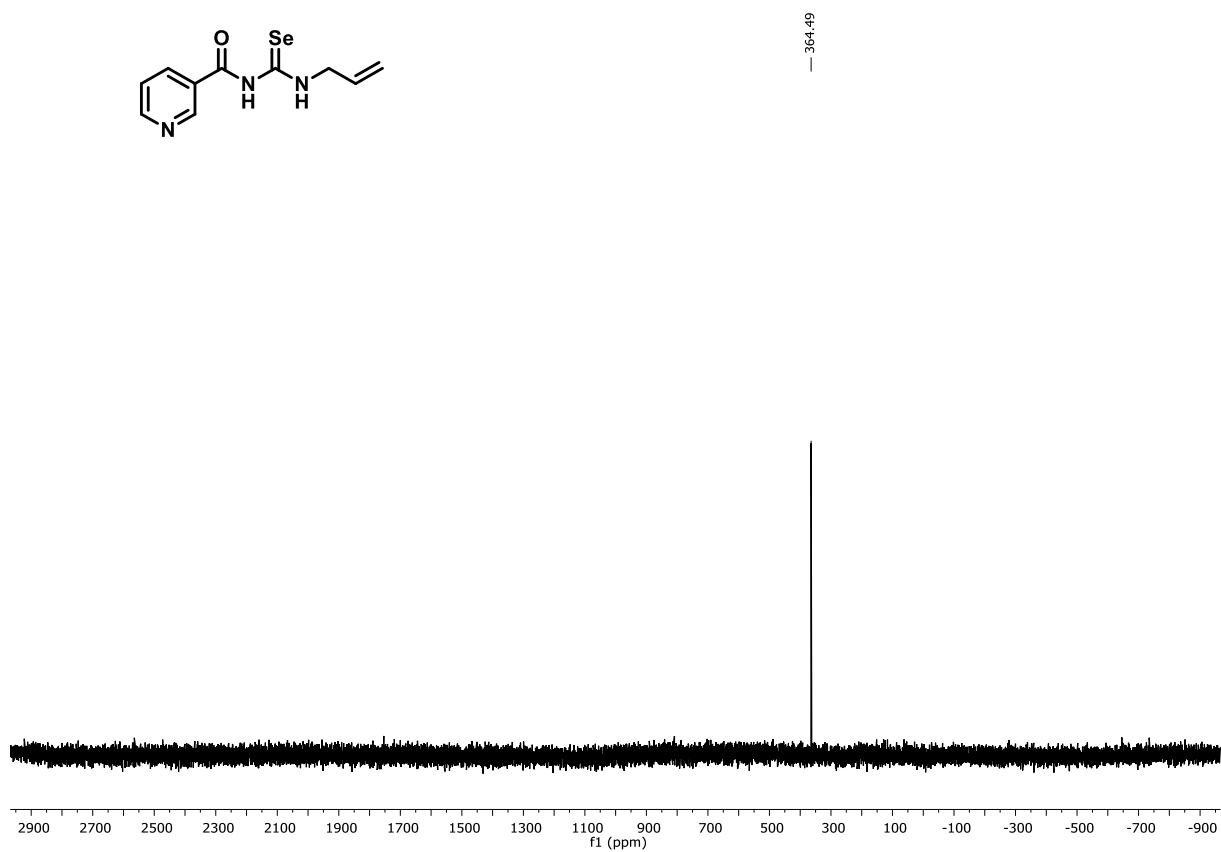

Figure S56.  $^{77}\text{Se}$ -NMR spectrum of compound **7.II**.

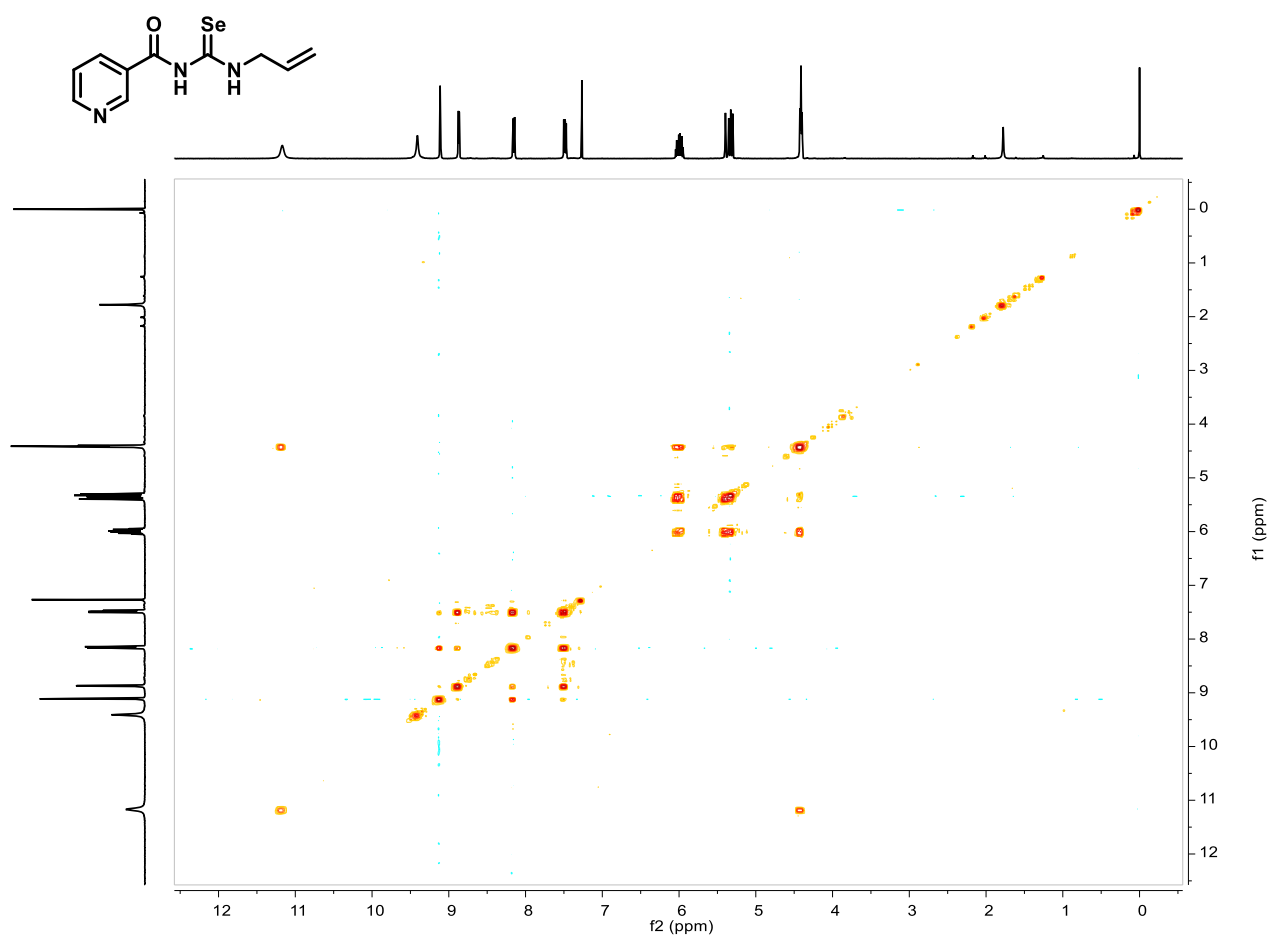

Figure S57. COSY-NMR spectrum of compound **7.II**.

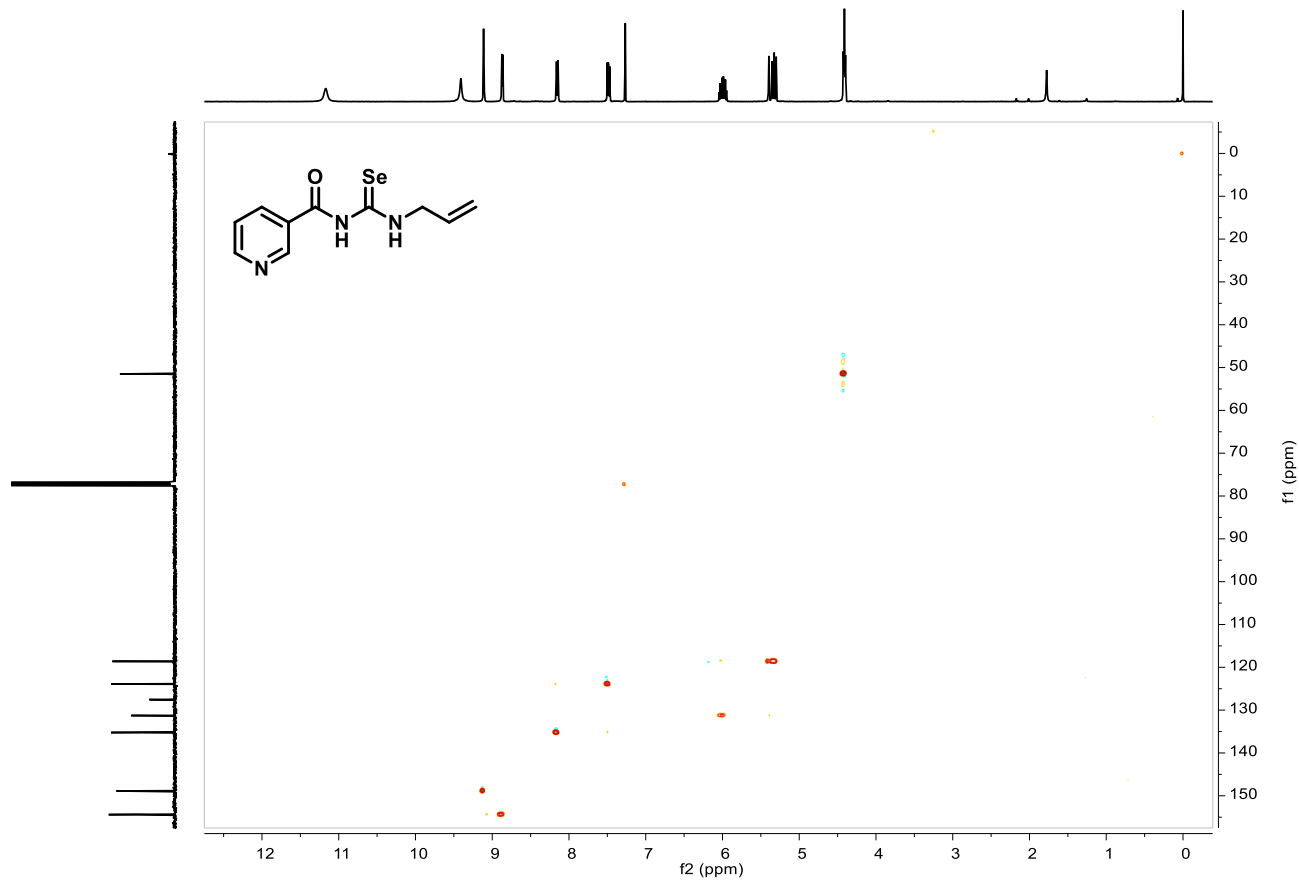

Figure S58. HSQC-NMR spectrum of compound **7.II**.

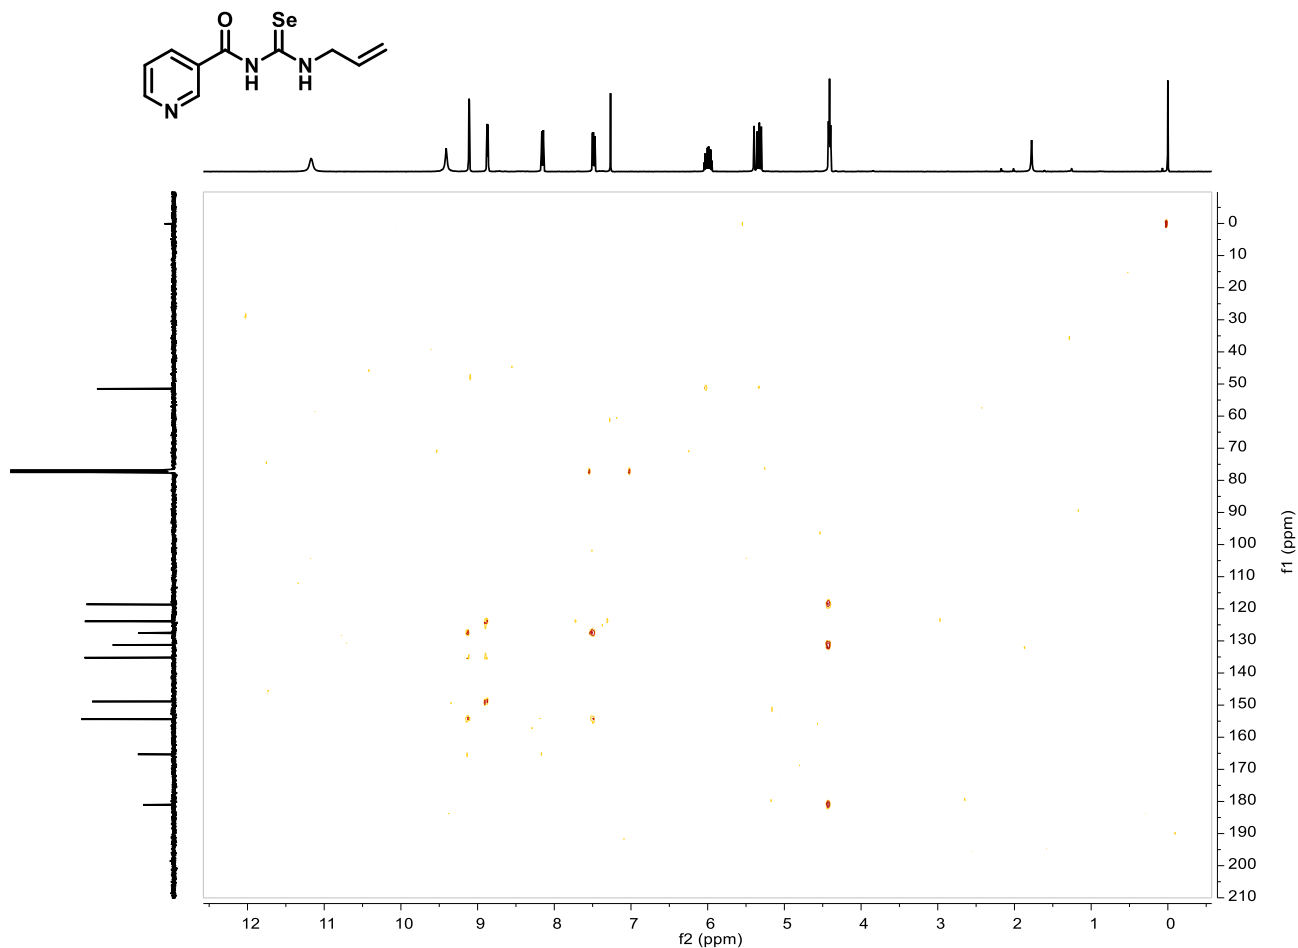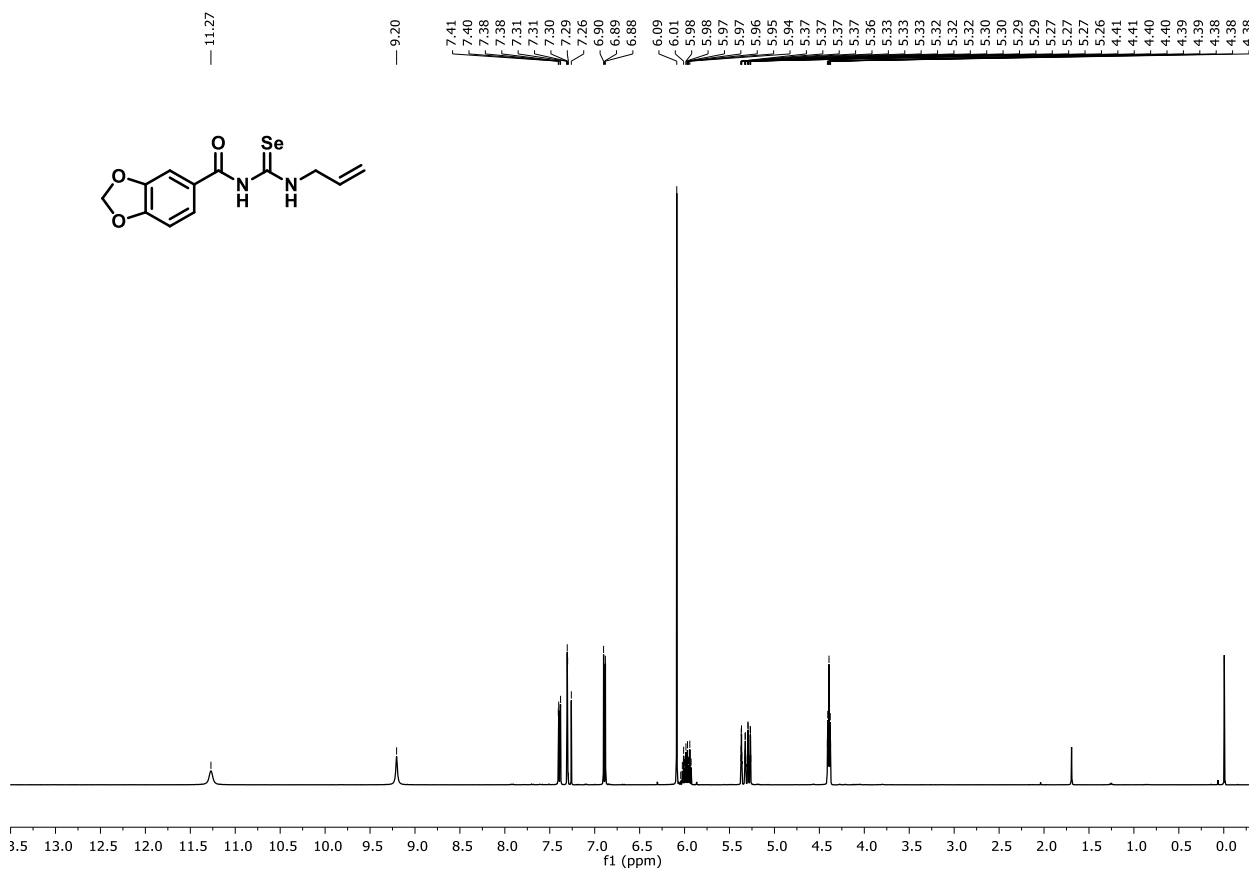

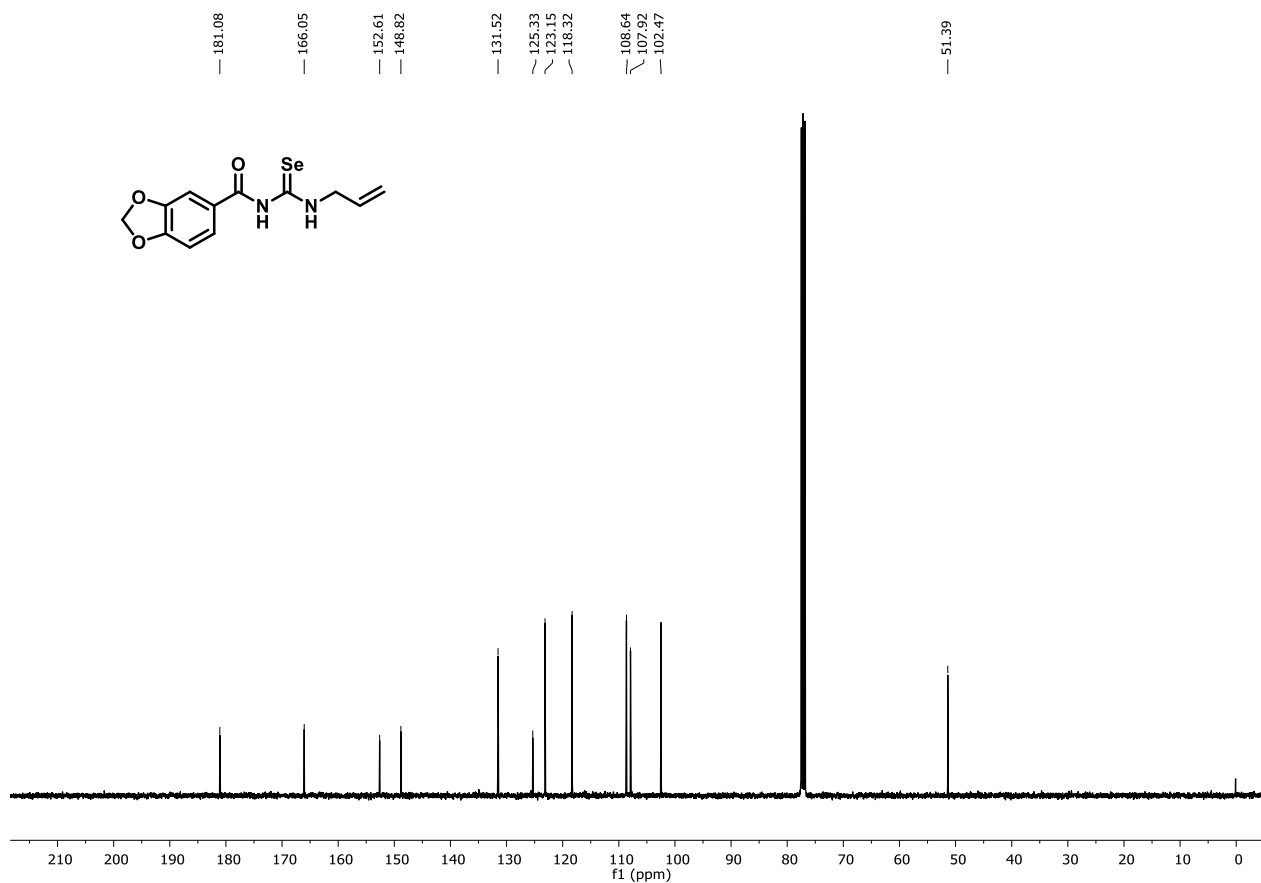

**Figure S61.**  $^{13}\text{C}$ -NMR spectrum of compound **8.II**.

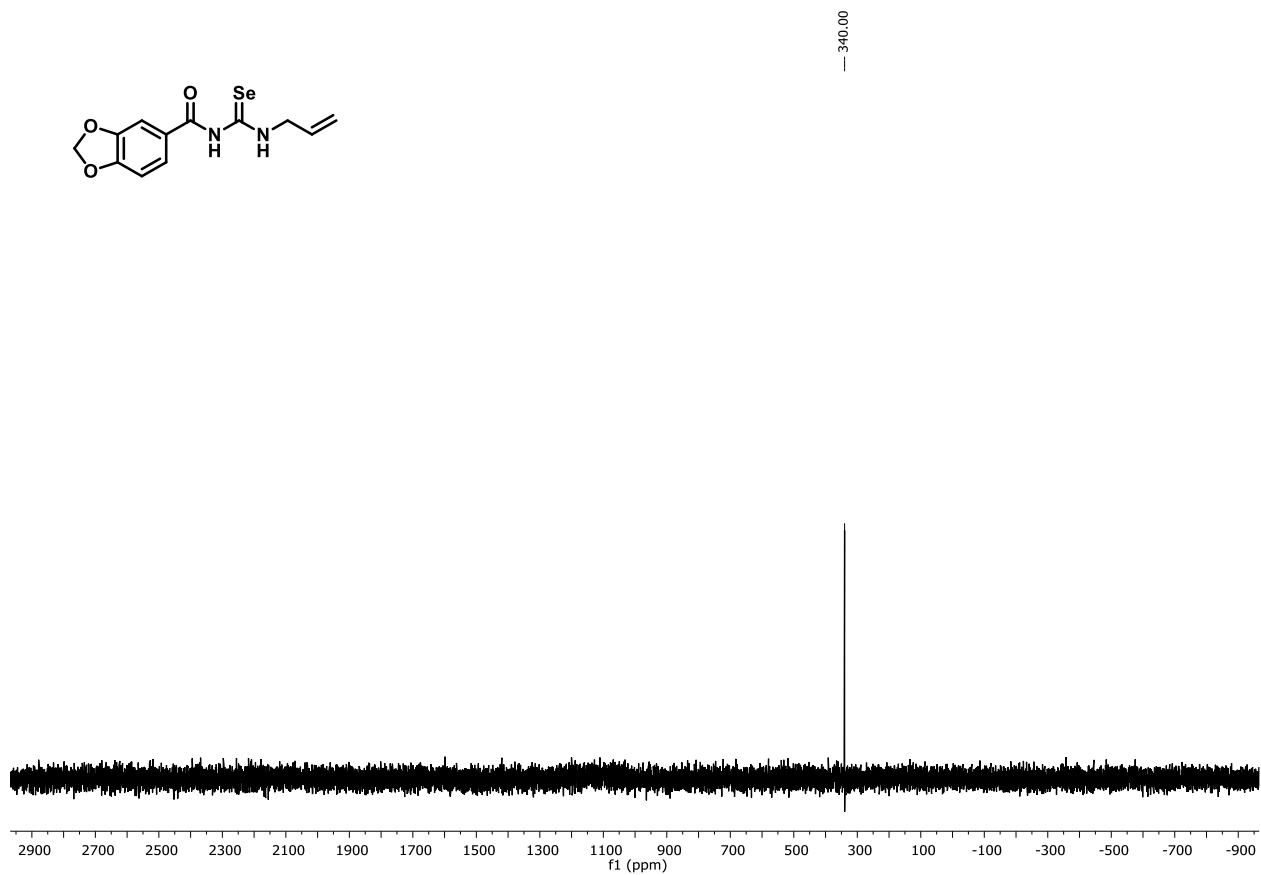

**Figure S62.**  $^{77}\text{Se}$ -NMR spectrum of compound **8.II**.

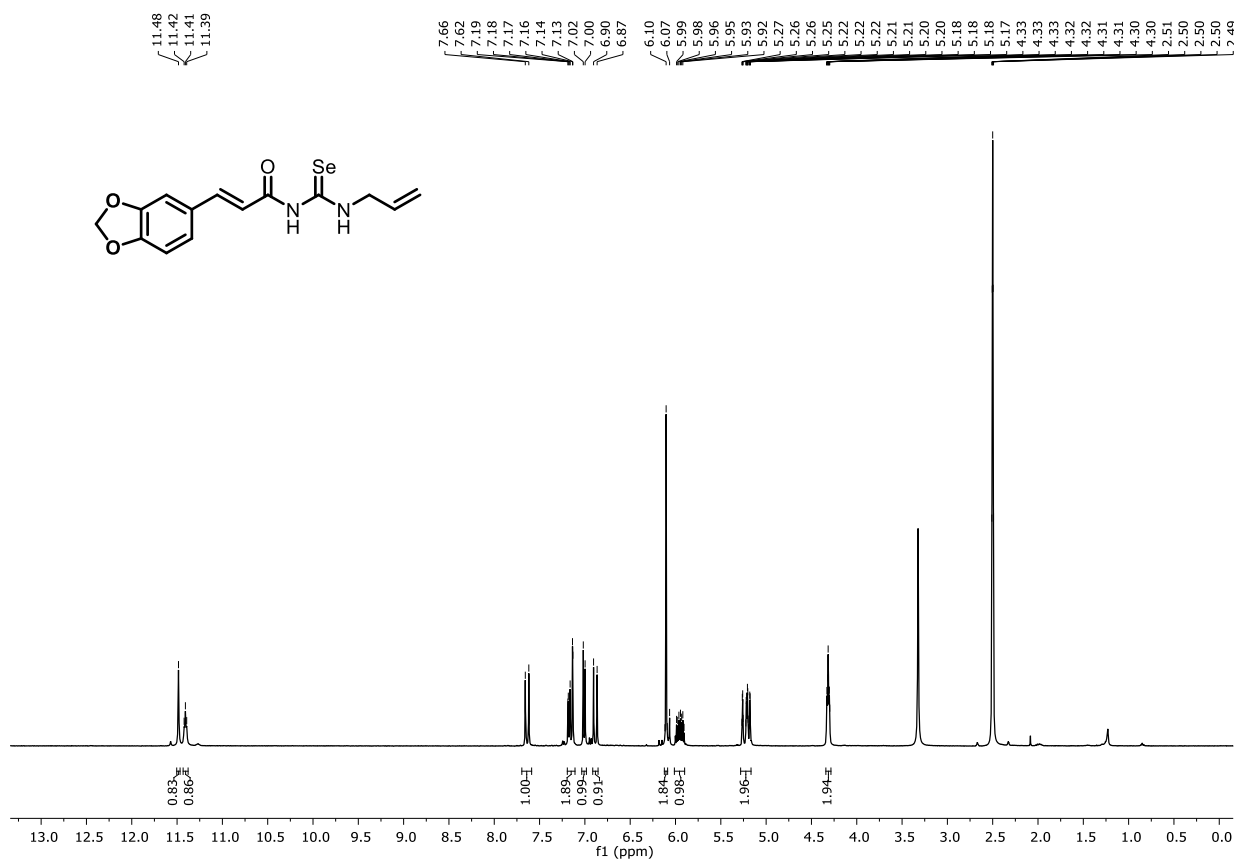

Figure S63. <sup>1</sup>H-NMR spectrum of compound 9.II.

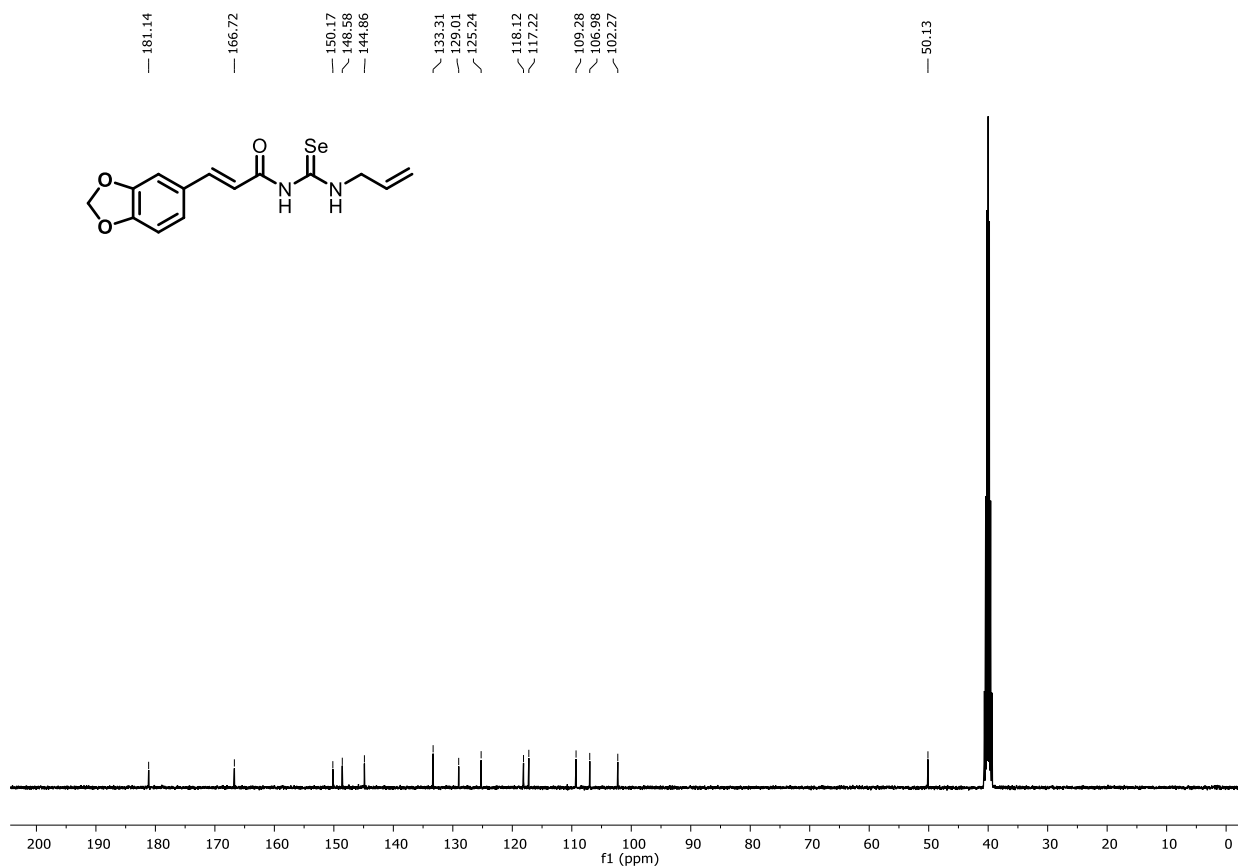

Figure S64. <sup>13</sup>C-NMR spectrum of compound 9.II.



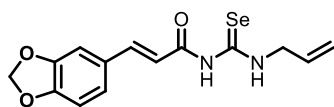

— 333.51

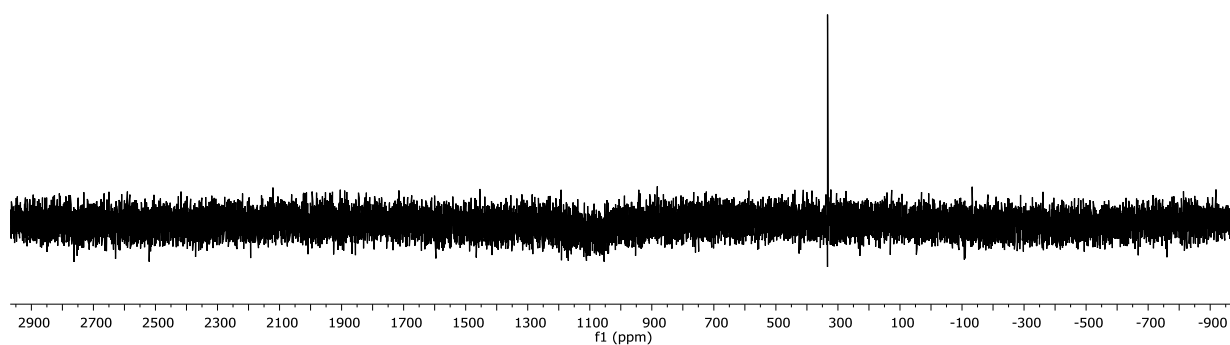

Figure S65.  $^{77}\text{Se}$ -NMR spectrum of compound **9.II**.

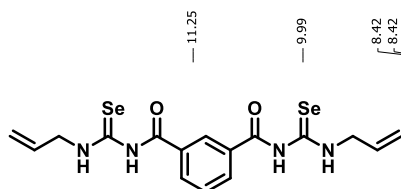

— 11.25

— 9.99

8.42

8.41

8.13

8.12

8.11

7.72

7.70

7.68

6.03

6.00

5.99

5.97

5.96

5.95

5.93

5.39

5.38

5.34

5.34

5.31

5.28

4.41

4.40

4.39

4.38

4.37

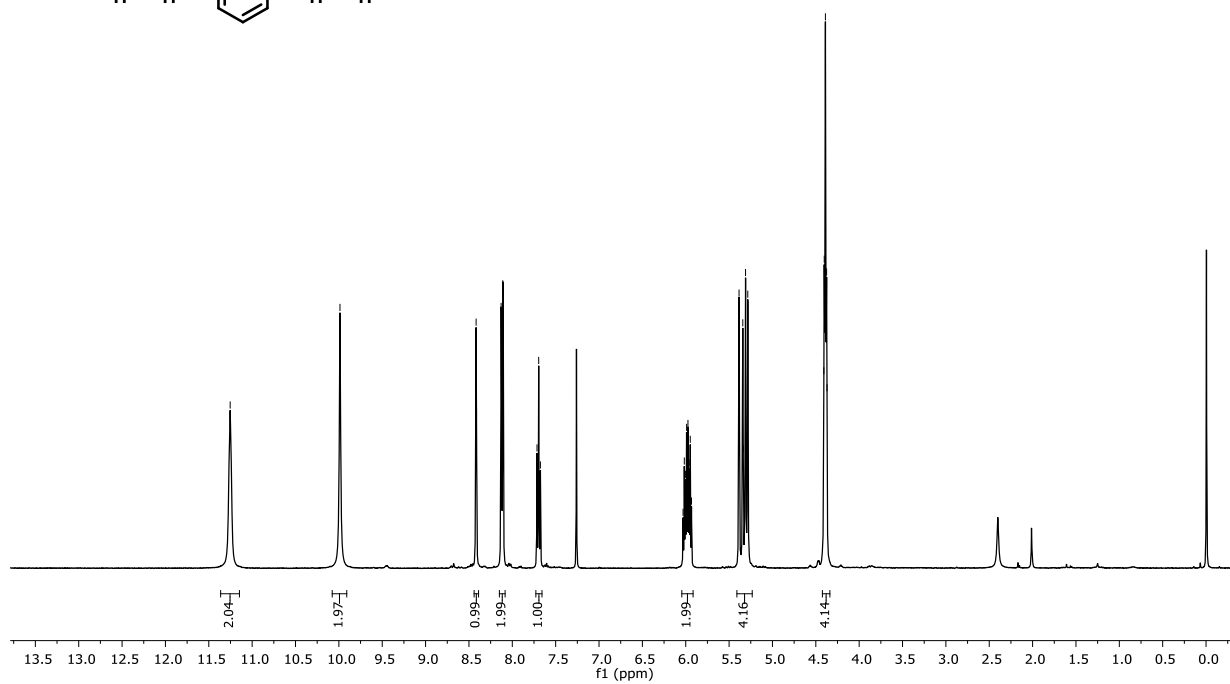

Figure S66.  $^1\text{H}$ -NMR spectrum of compound **10.II**.

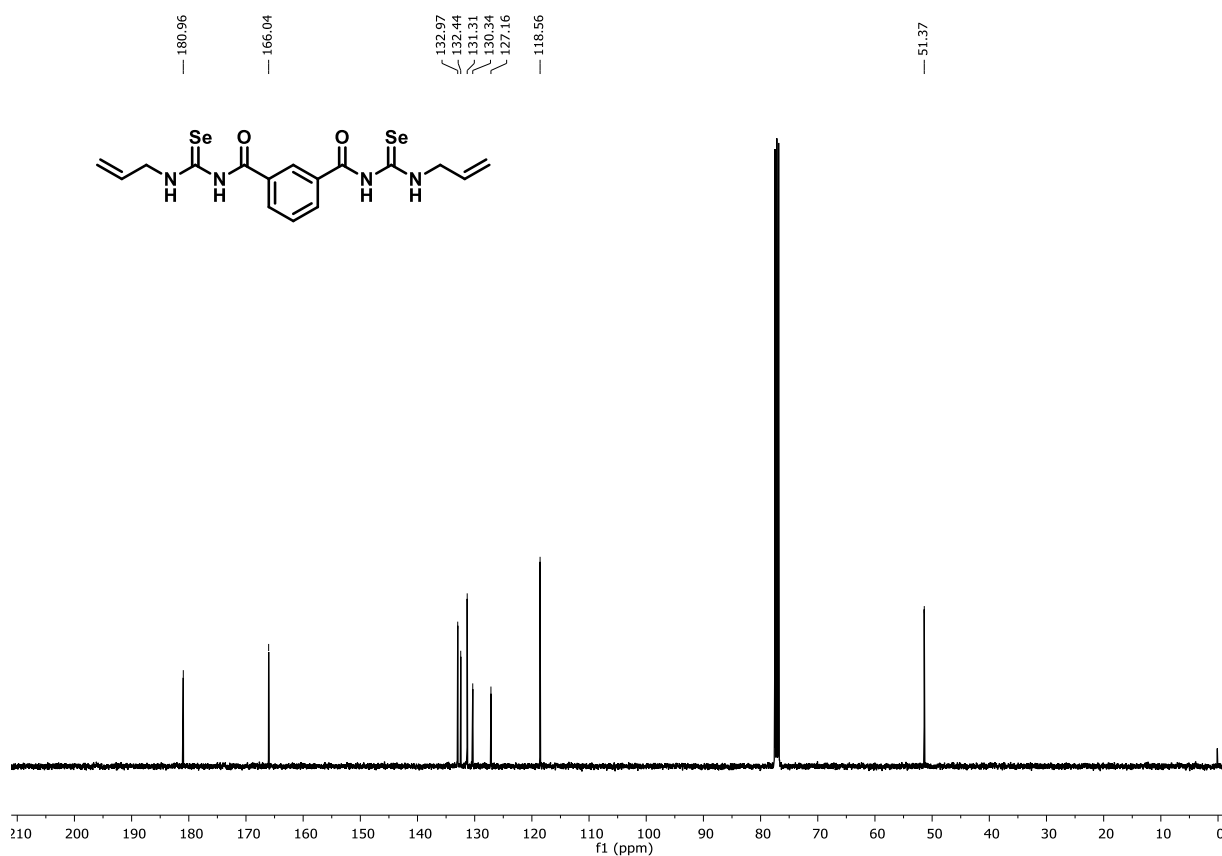

**Figure S67.** <sup>13</sup>C-NMR spectrum of compound **10.II**.

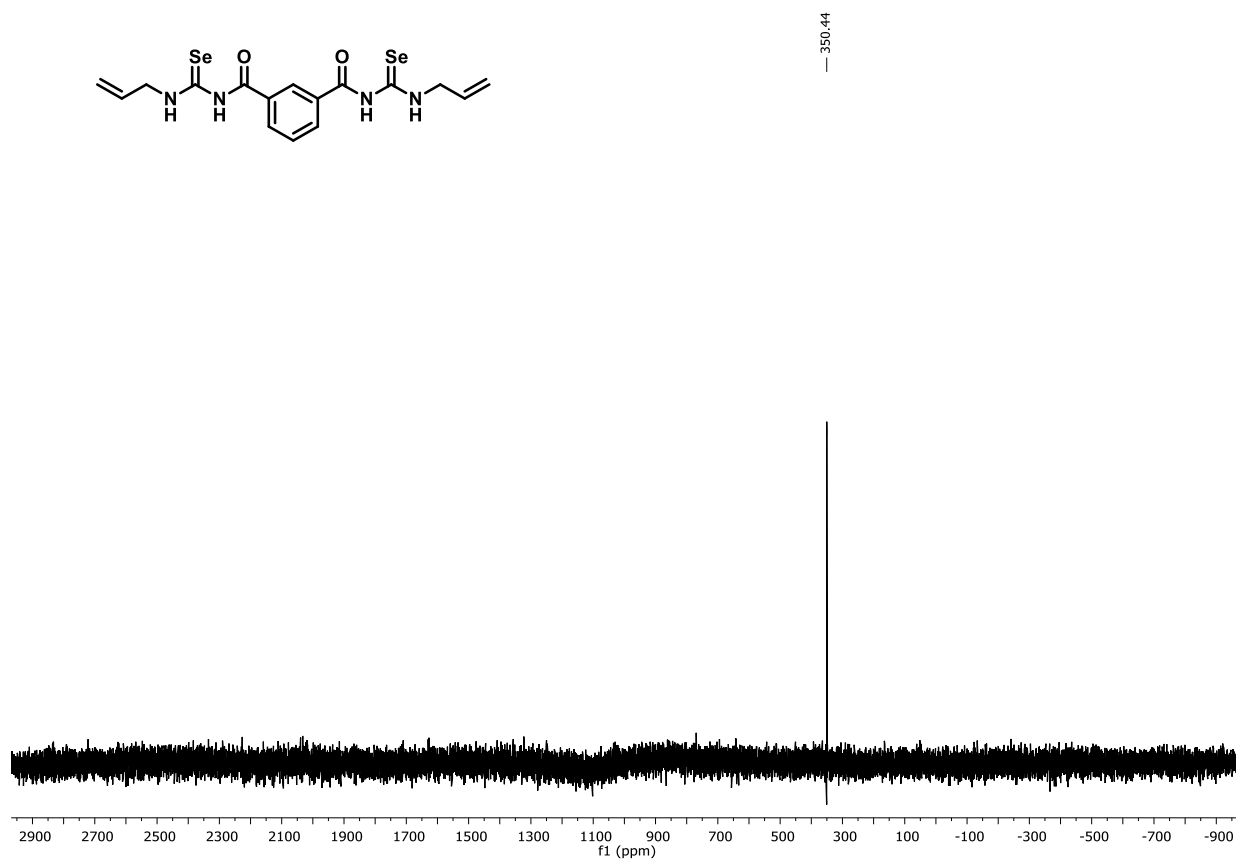

**Figure S68.** <sup>77</sup>Se-NMR spectrum of compound **10.II**.

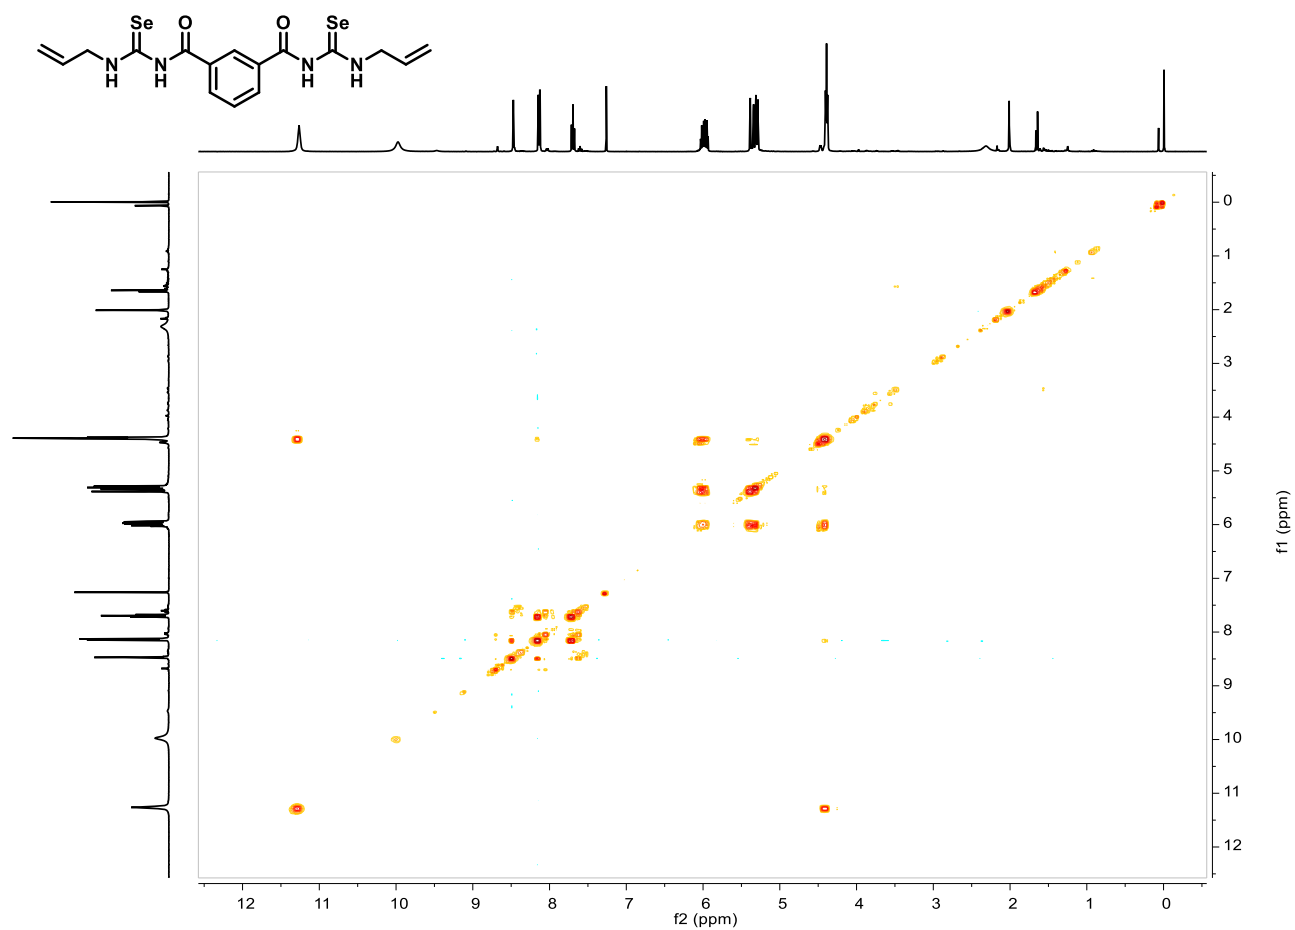

Figure S69. COSY-NMR spectrum of compound **10.II**.

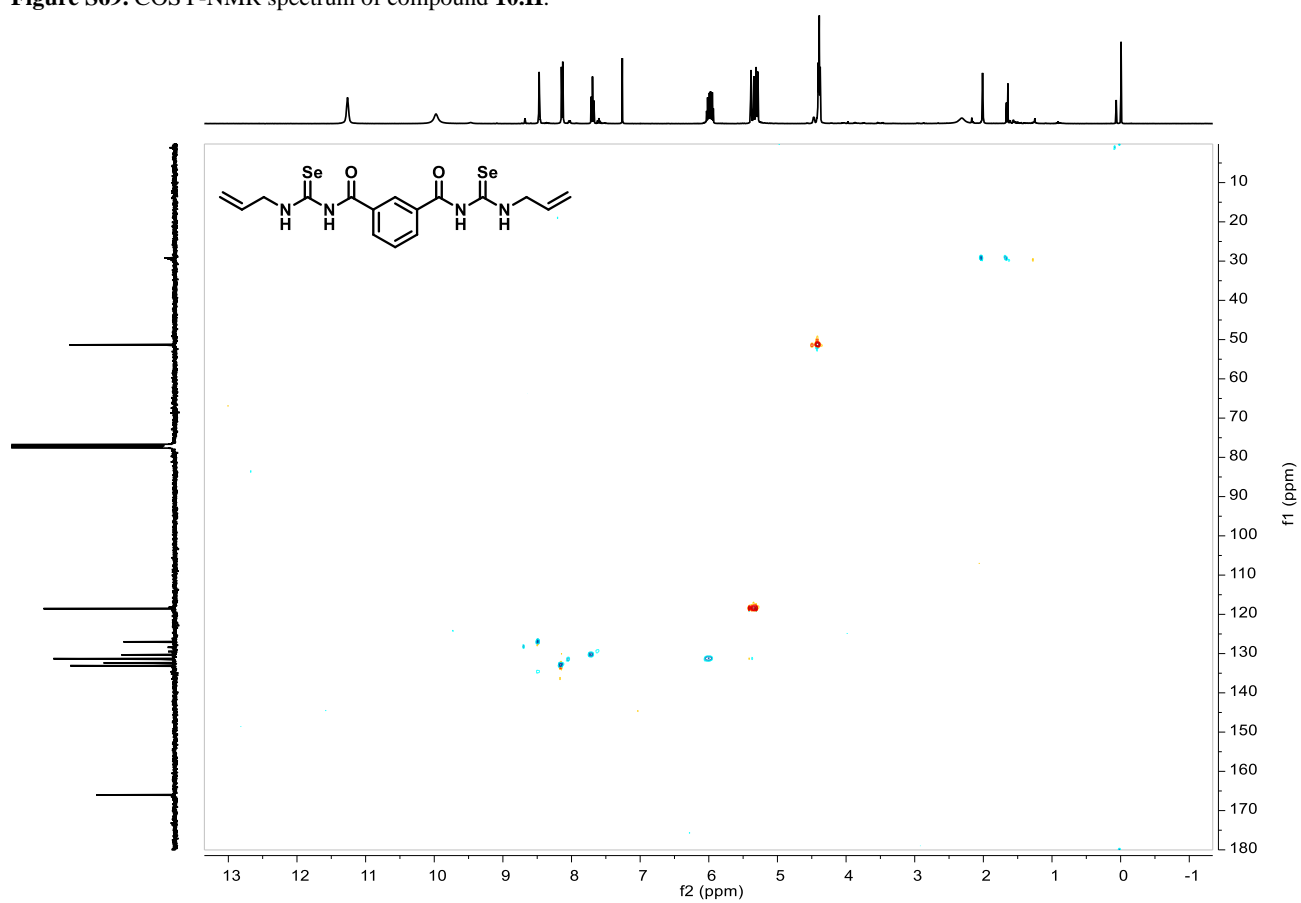

Figure S70. HSQC-NMR spectrum of compound **10.II**.

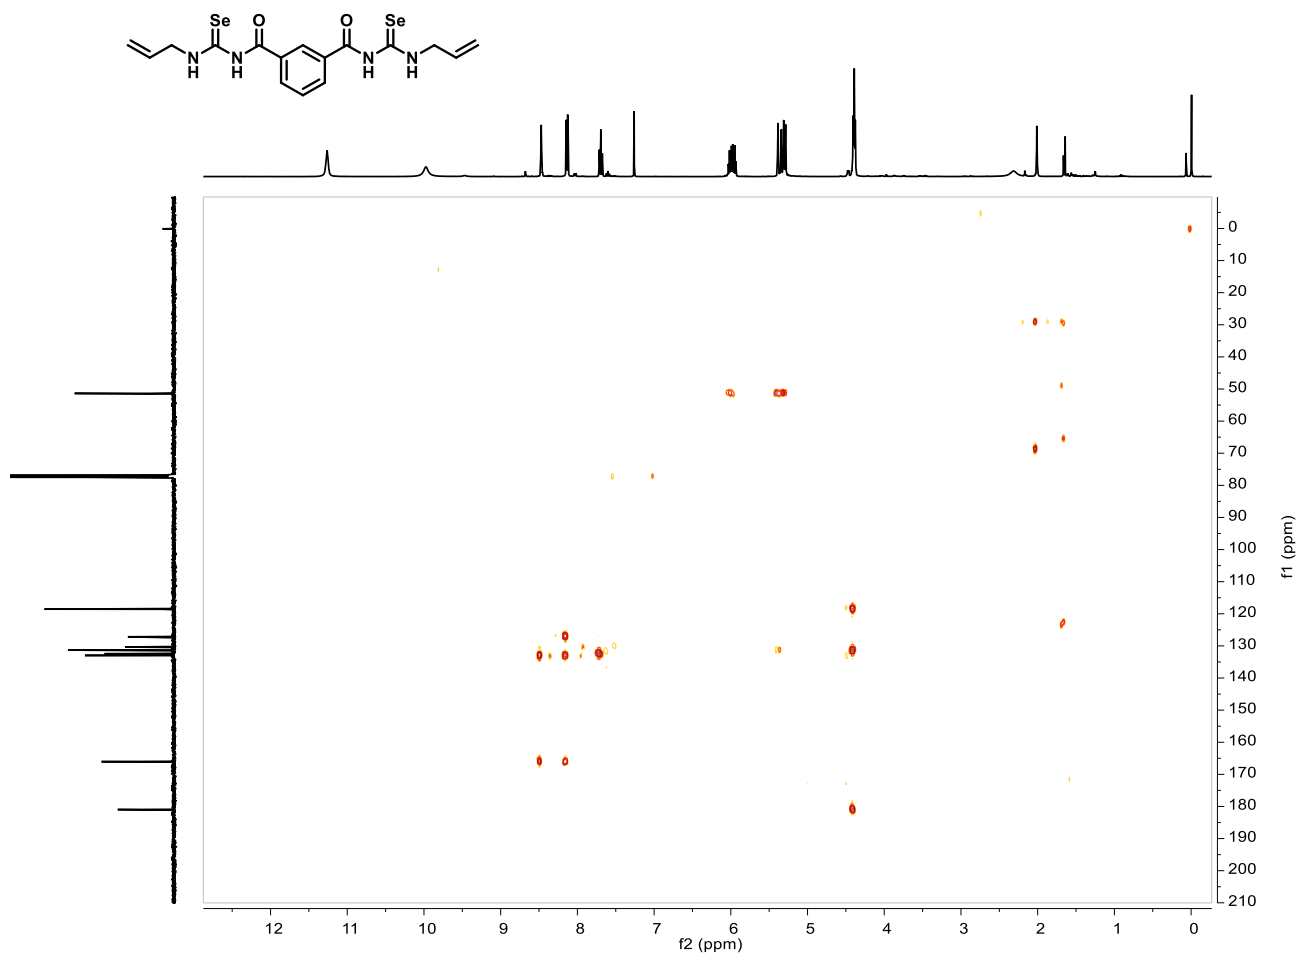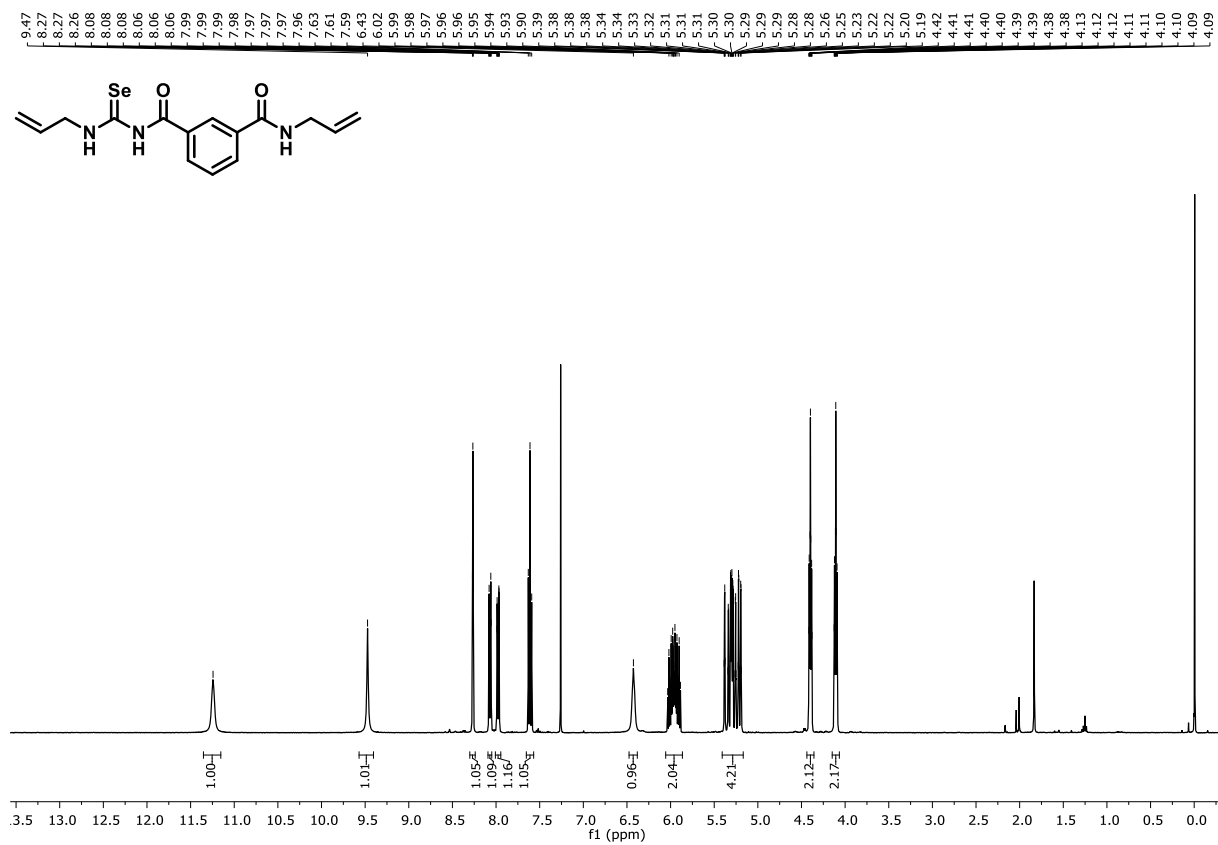

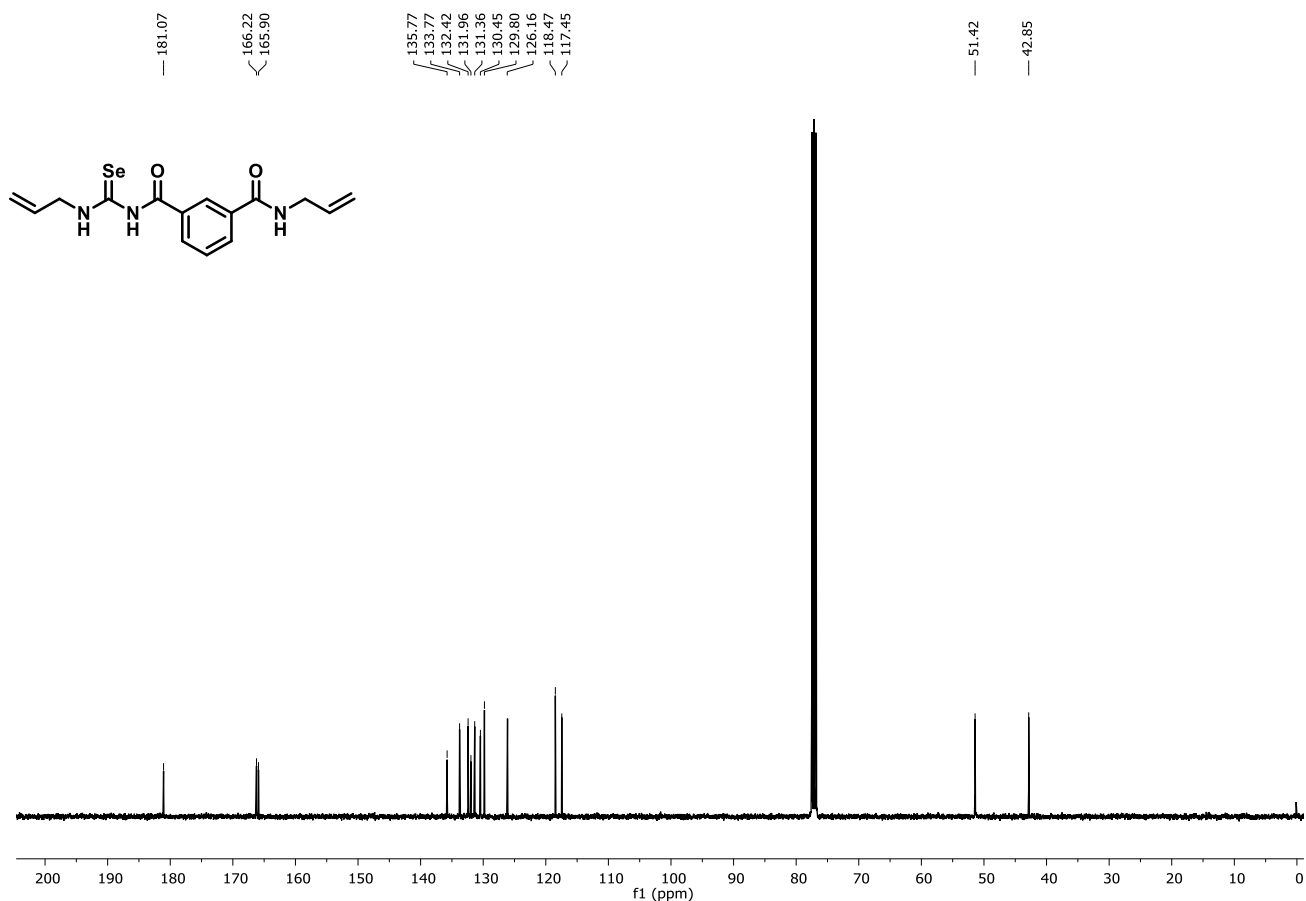

**Figure S73.**  $^{13}\text{C}$ -NMR spectrum of compound **11.II**.

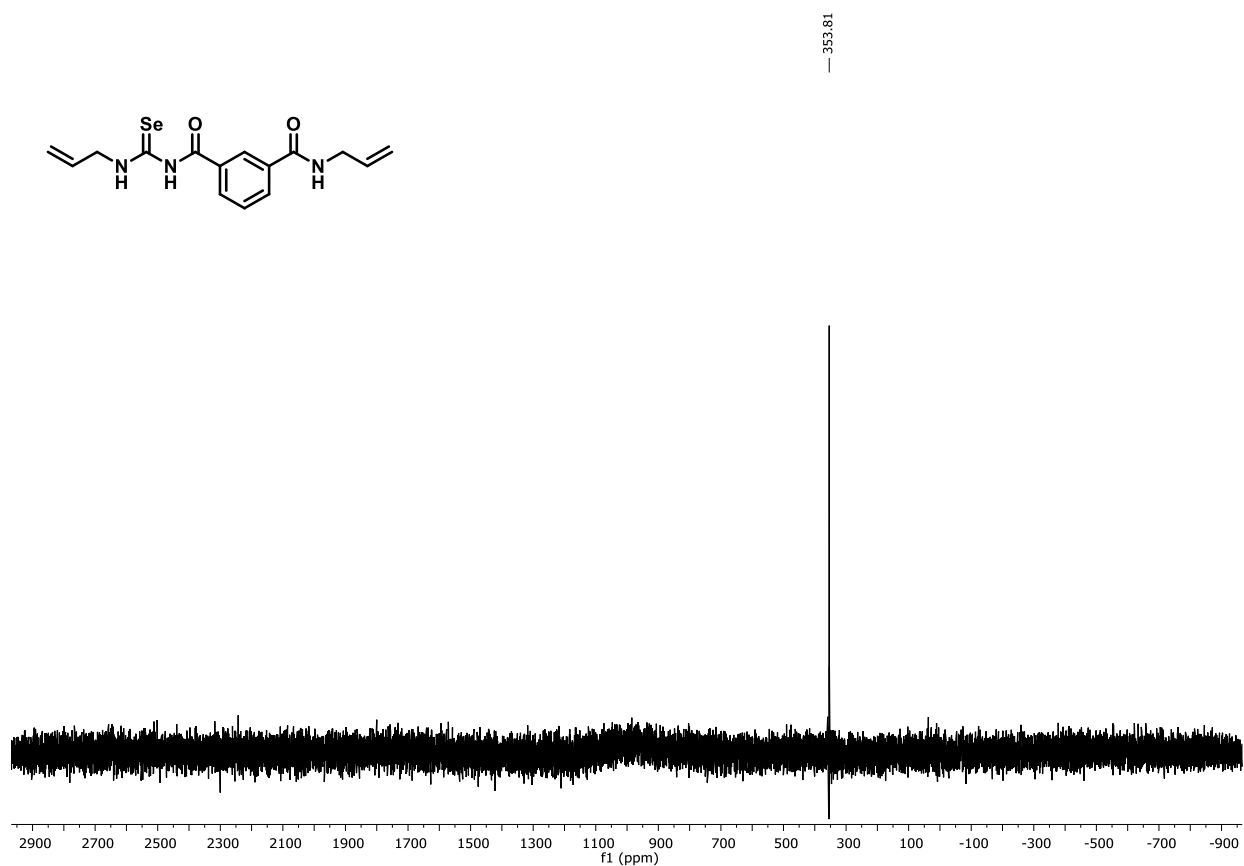

**Figure S74.**  $^{77}\text{Se}$ -NMR spectrum of compound **11.II**.

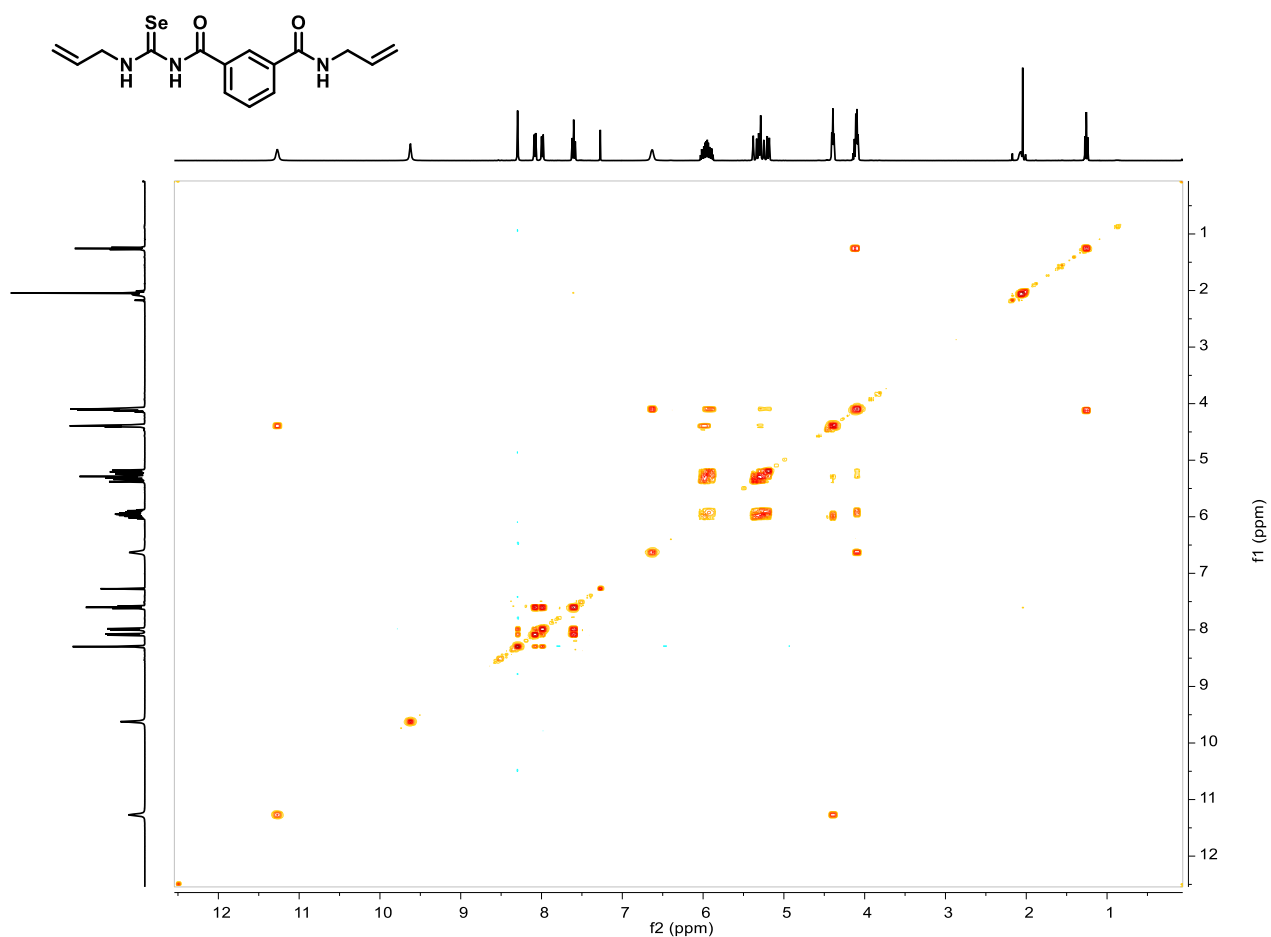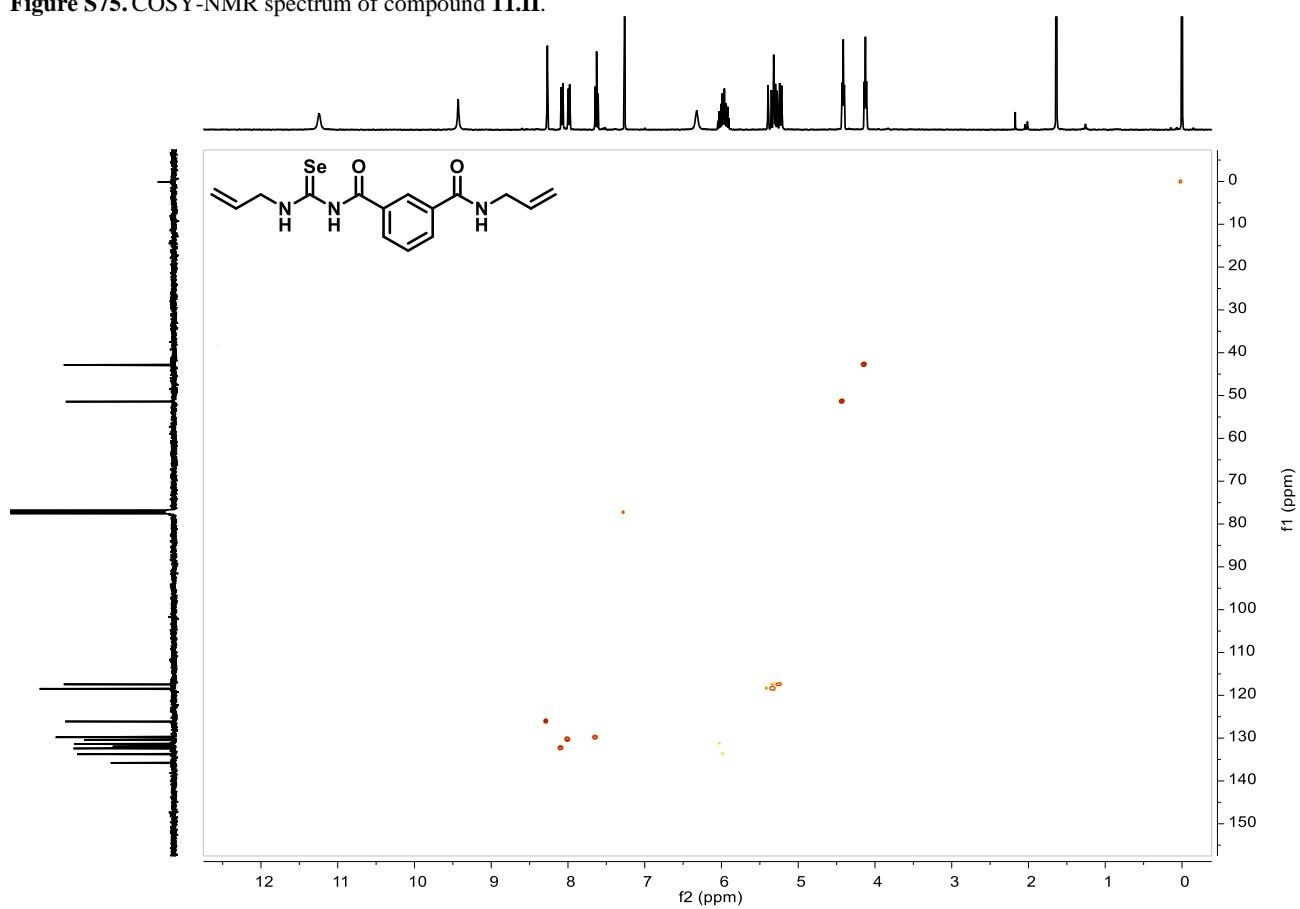

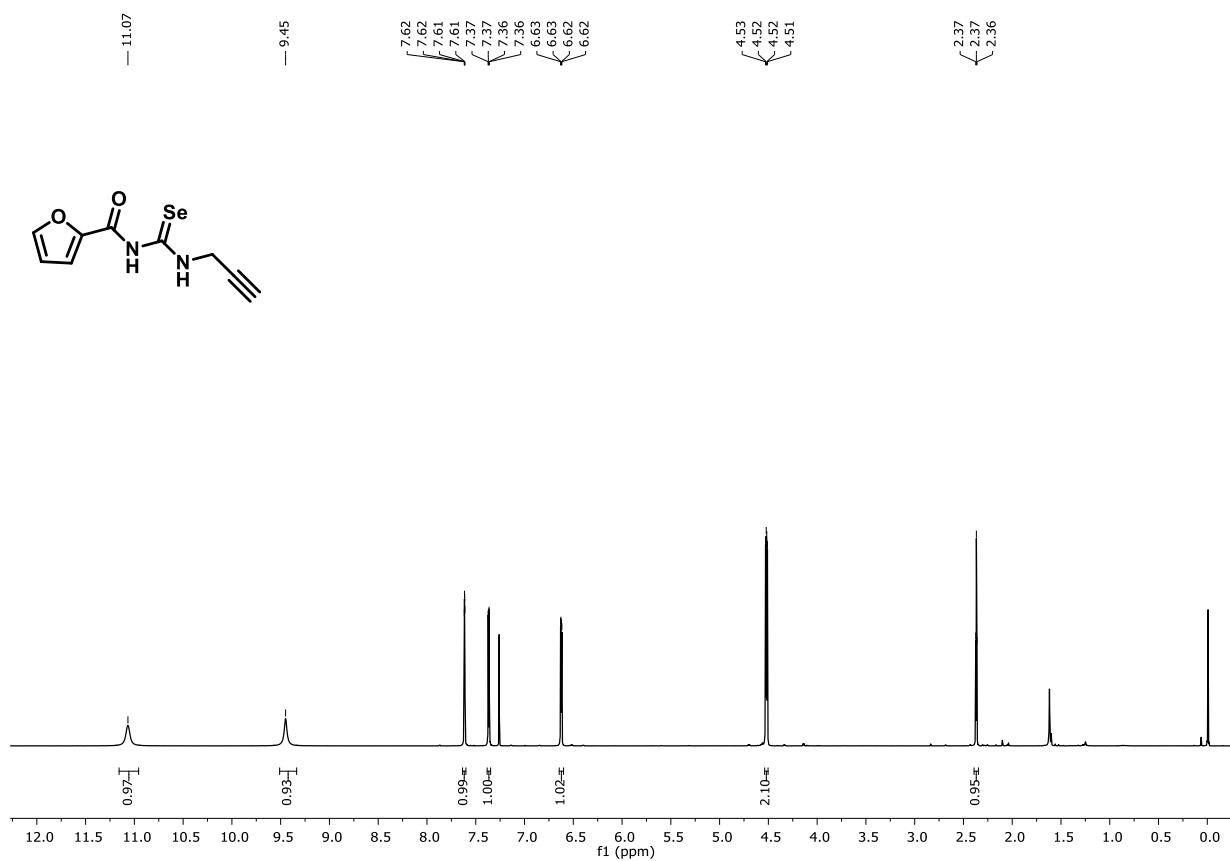

Figure S77. <sup>1</sup>H-NMR spectrum of compound **1.III**.

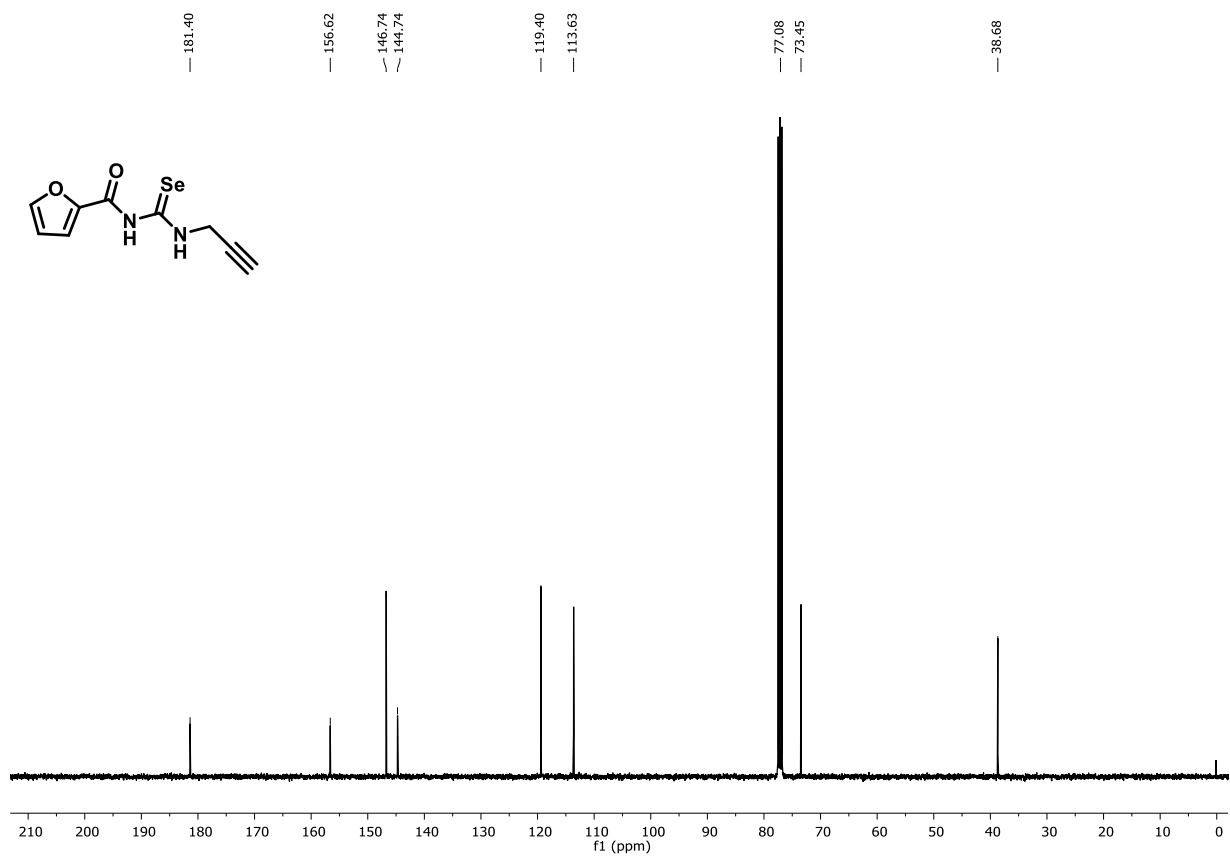

Figure S78. <sup>13</sup>C-NMR spectrum of compound **1.III**.

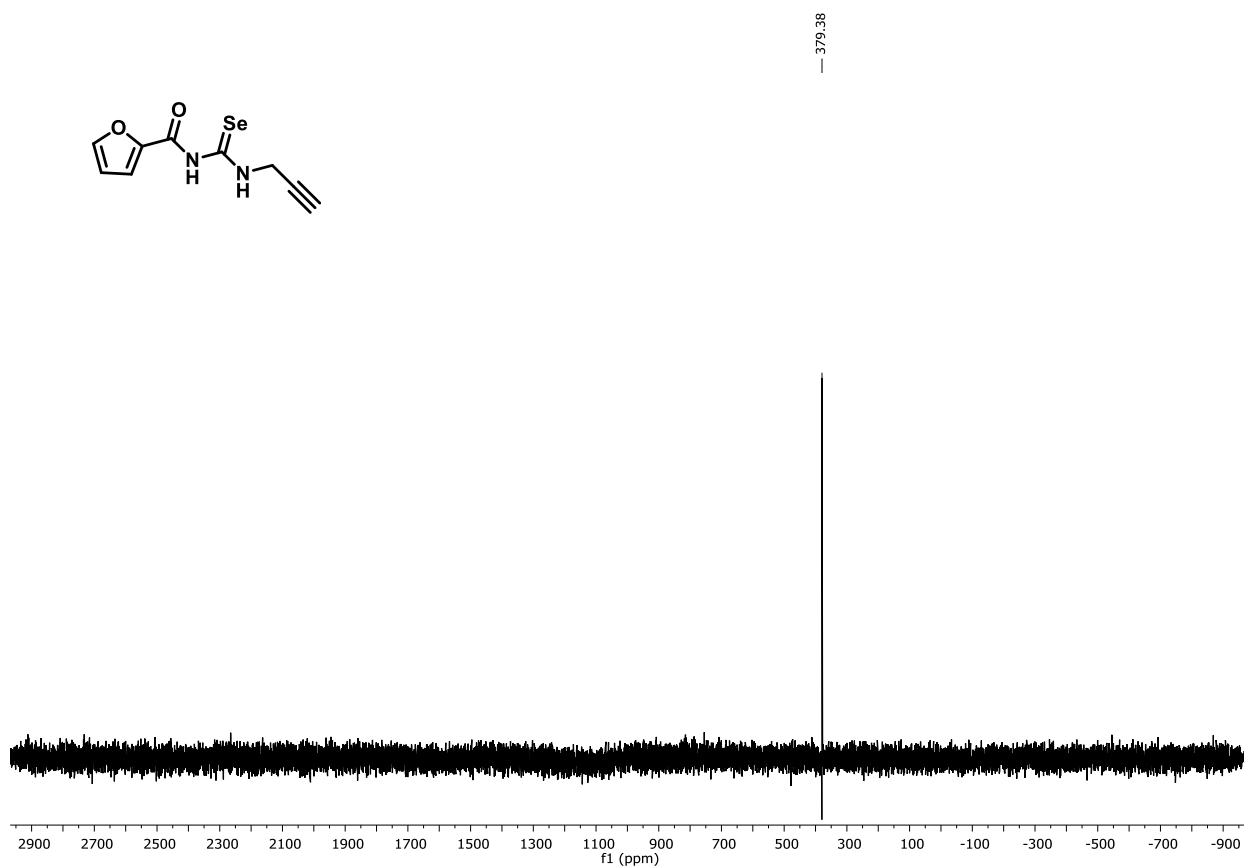

Figure S79.  $^{77}\text{Se}$ -NMR spectrum of compound 1.III.

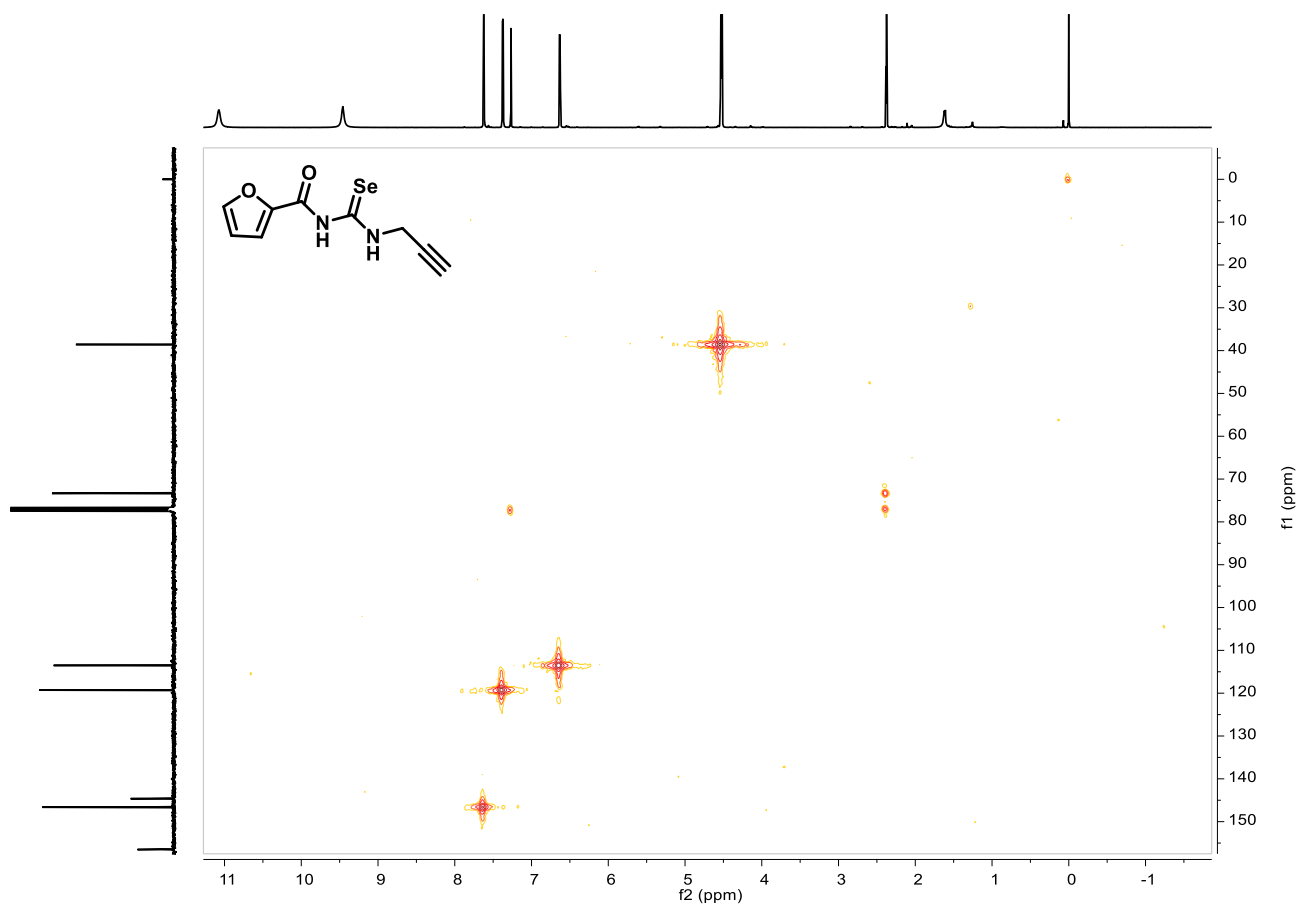

Figure S80. HMQC-NMR spectrum of compound 1.III.



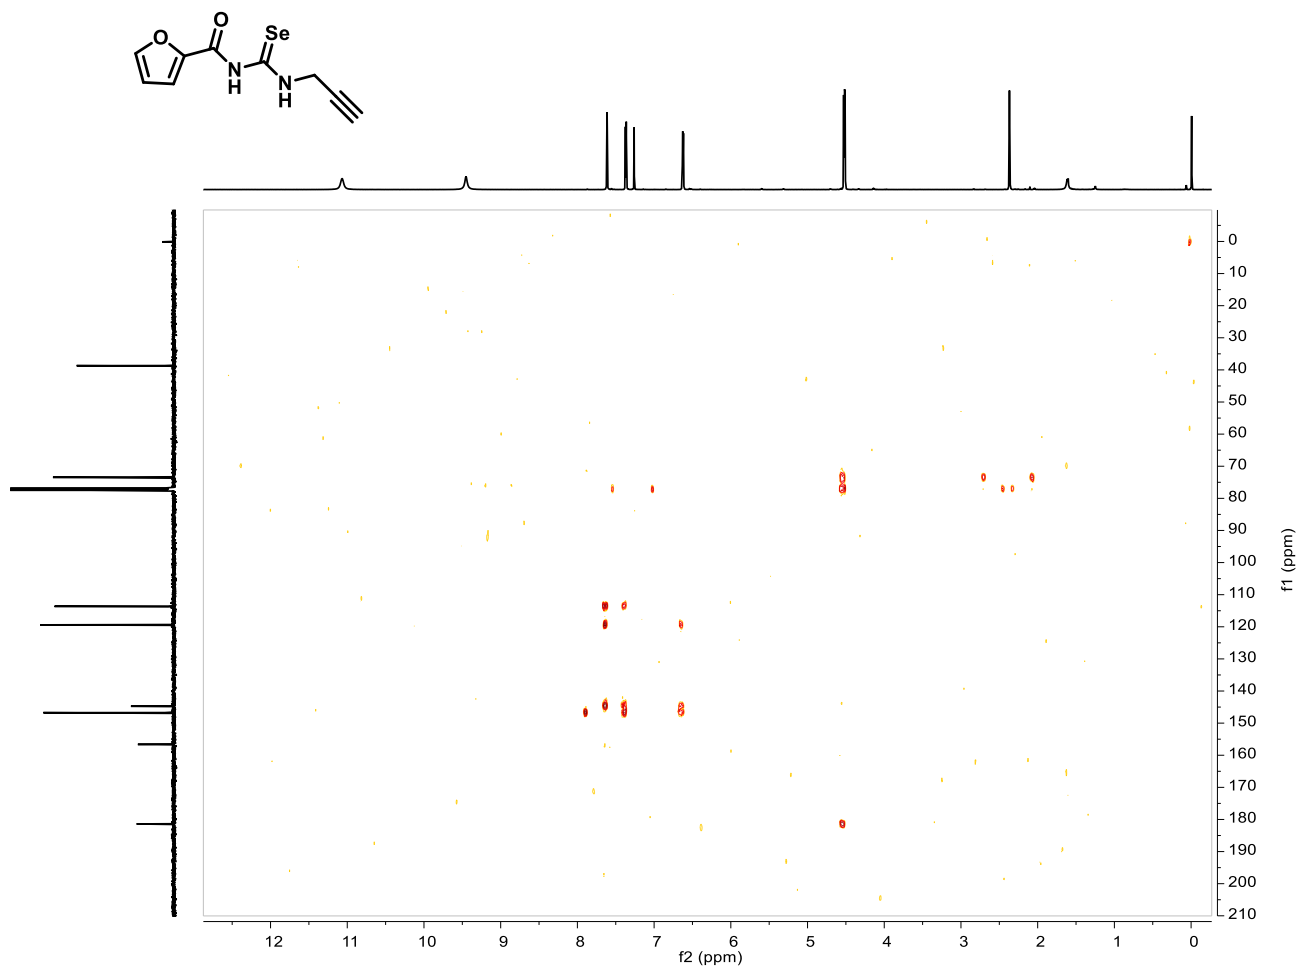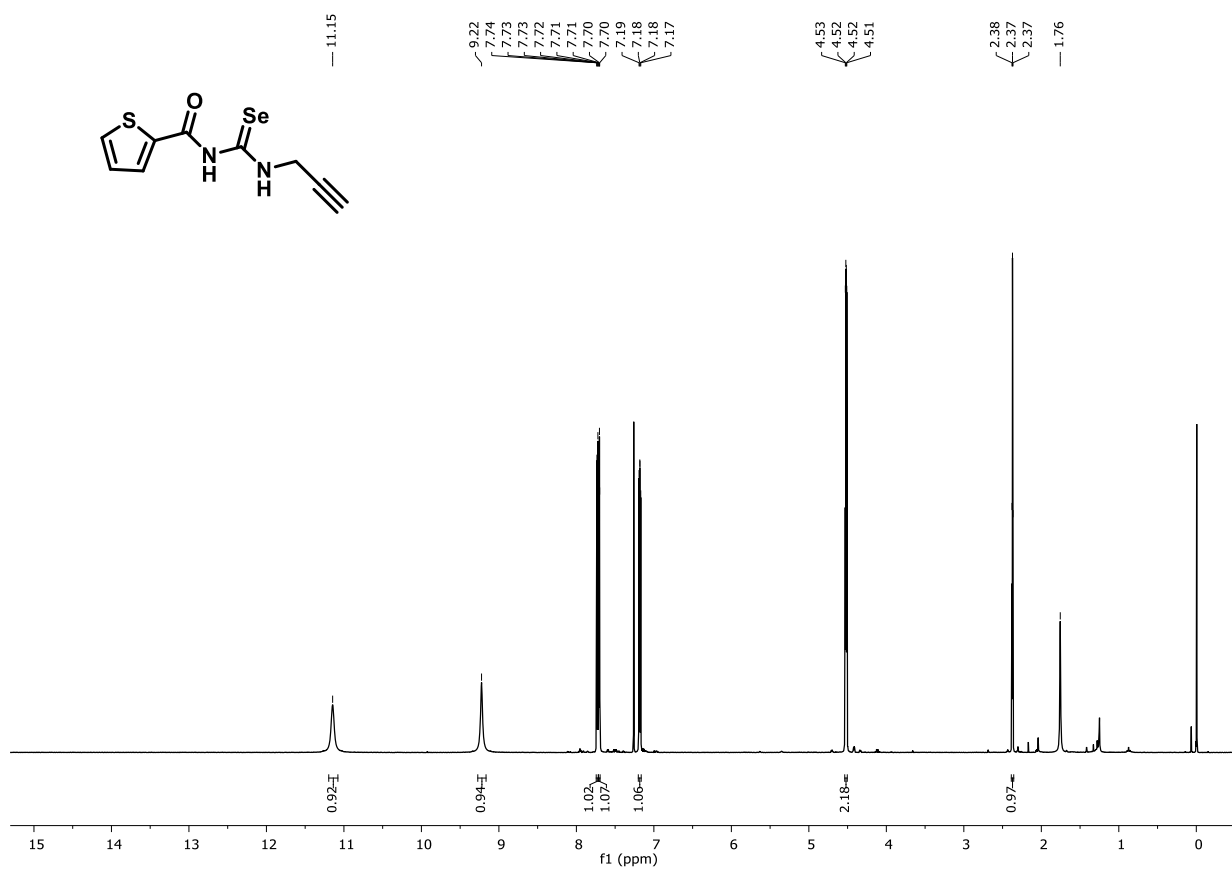

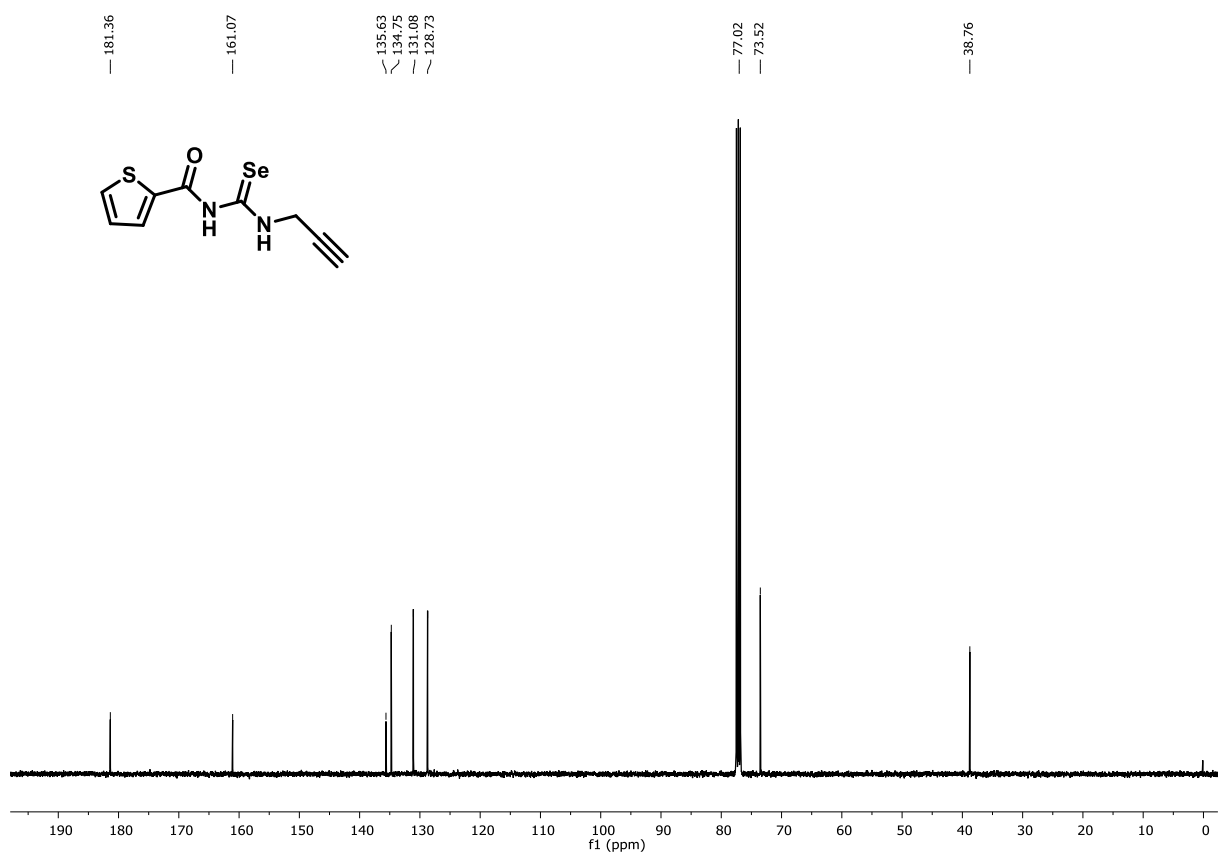

Figure S83. <sup>13</sup>C-NMR spectrum of compound 2.III.

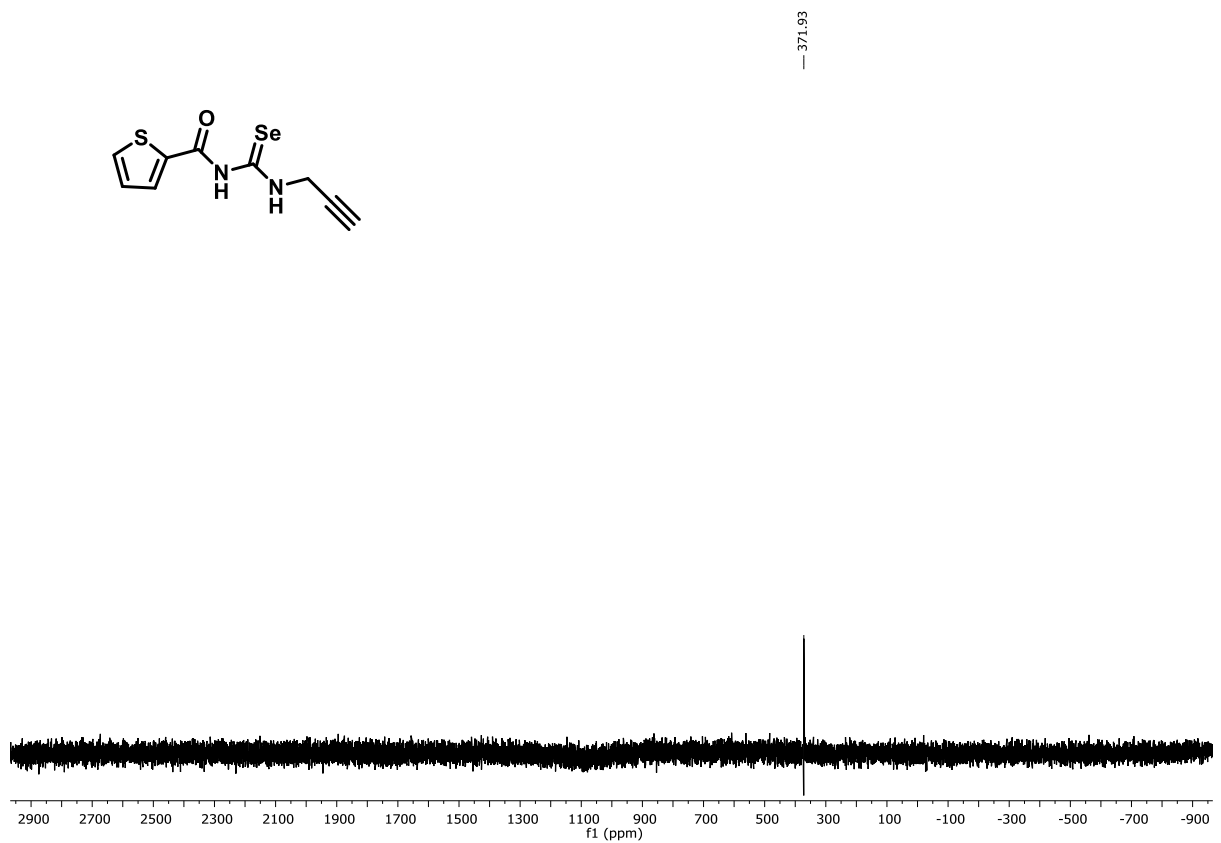

Figure S84. <sup>77</sup>Se-NMR spectrum of compound 2.III.

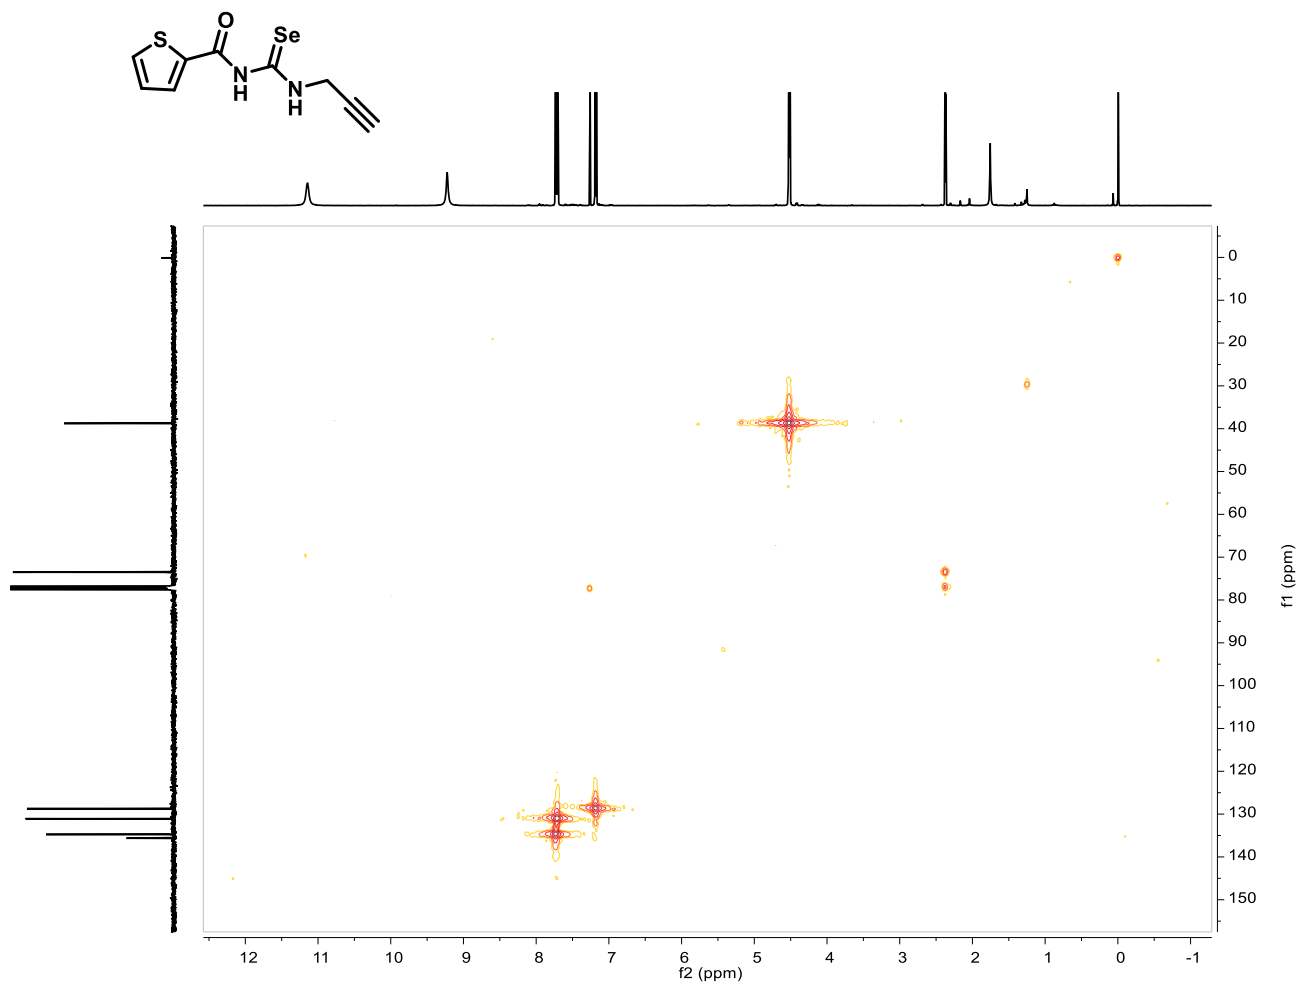

Figure S85. HMQC-NMR spectrum of compound **2.III**.

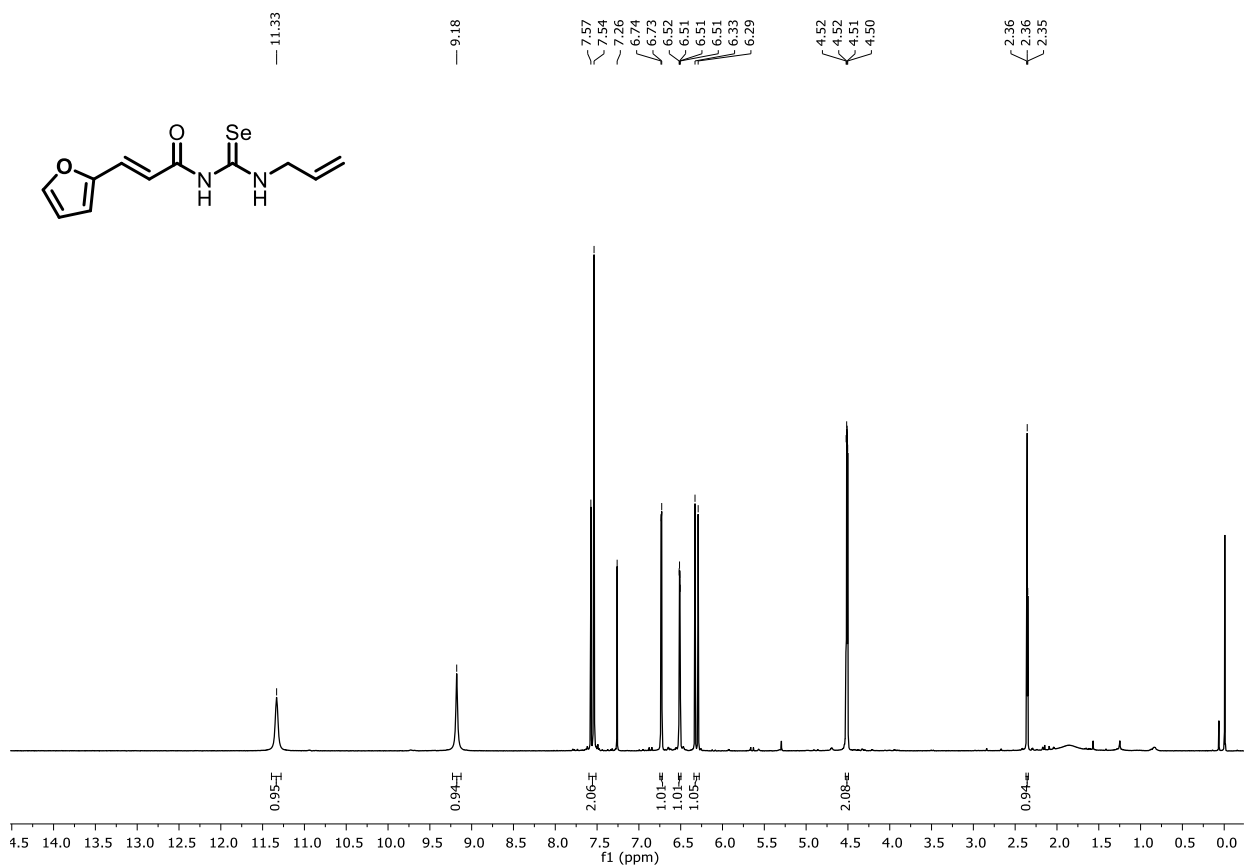

Figure S86. <sup>1</sup>H-NMR spectrum of compound **3.III**.

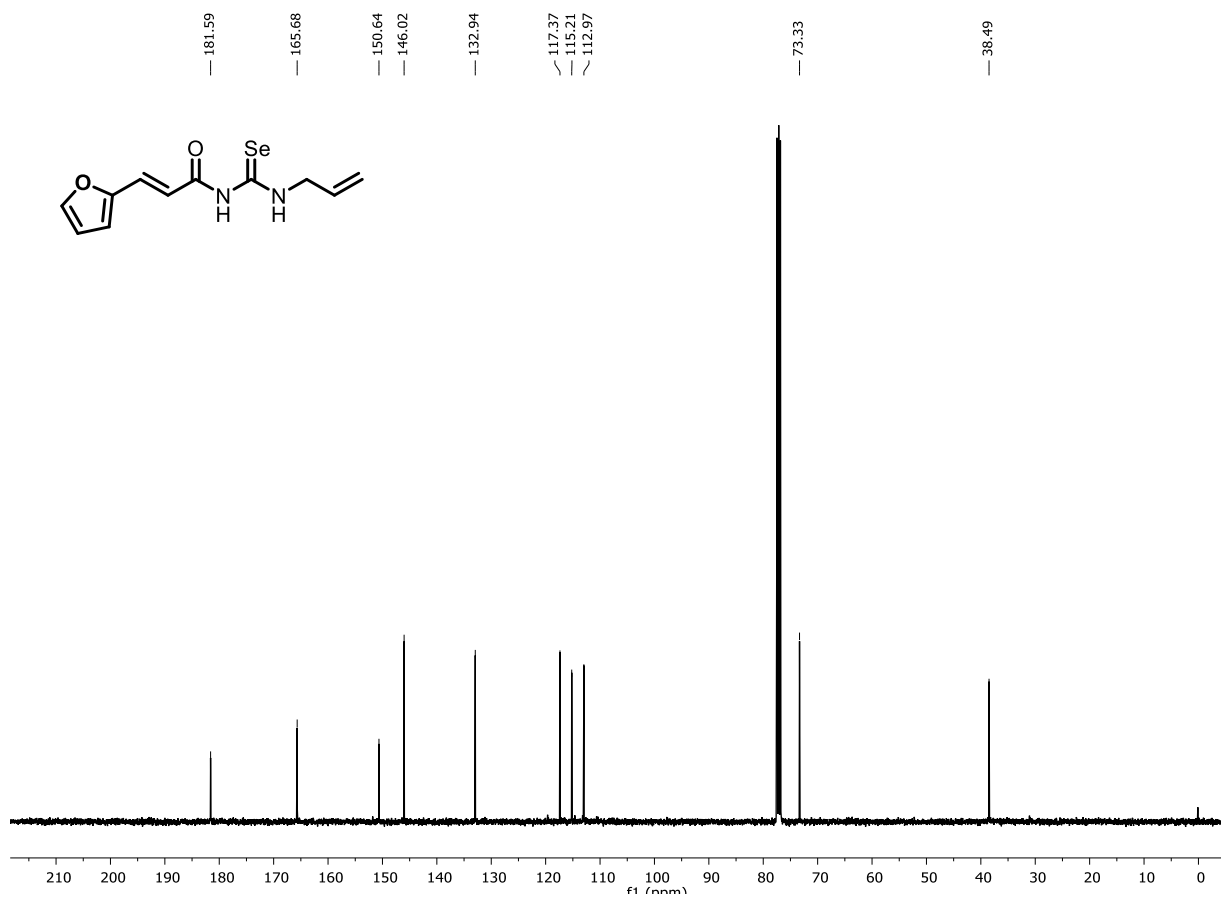

**Figure S87.**  $^{13}\text{C}$ -NMR spectrum of compound **3.III**.

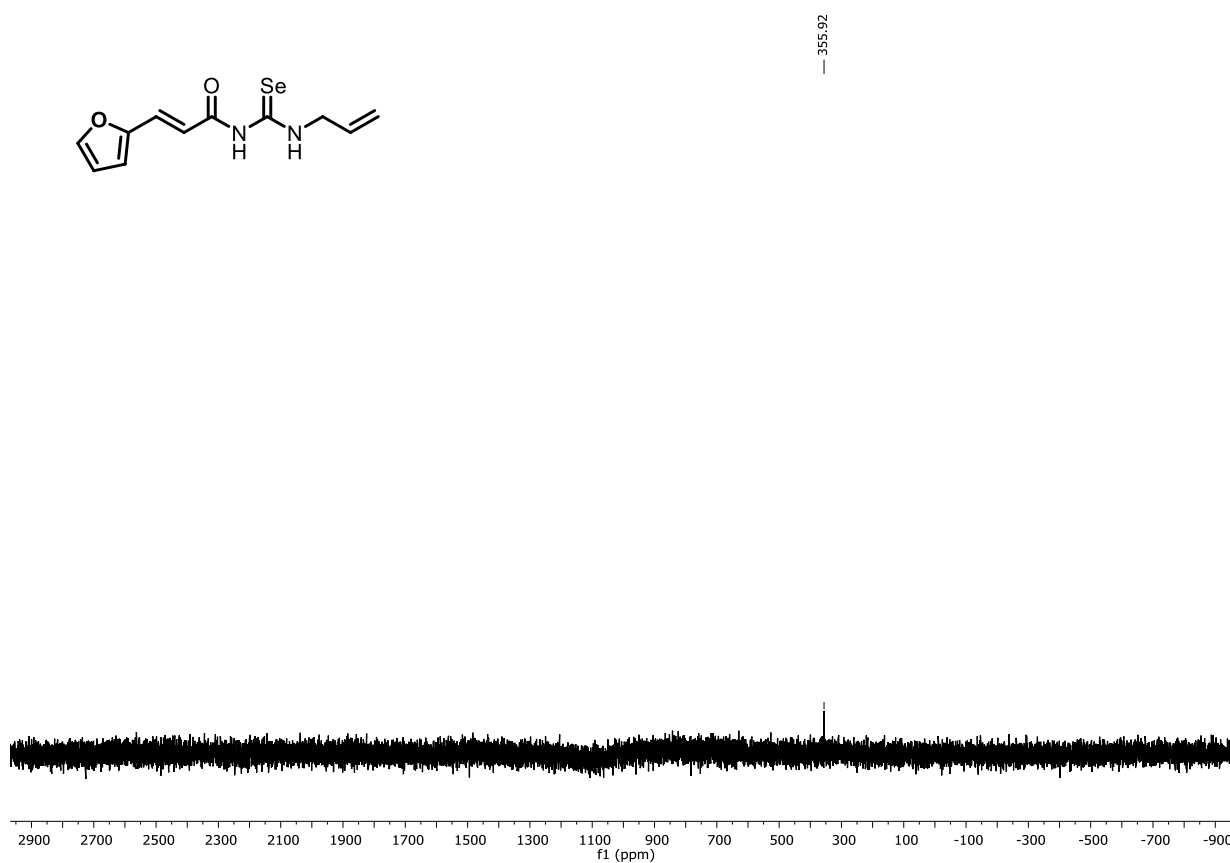

**Figure S88.**  $^{77}\text{Se}$ -NMR spectrum of compound **3.III**.

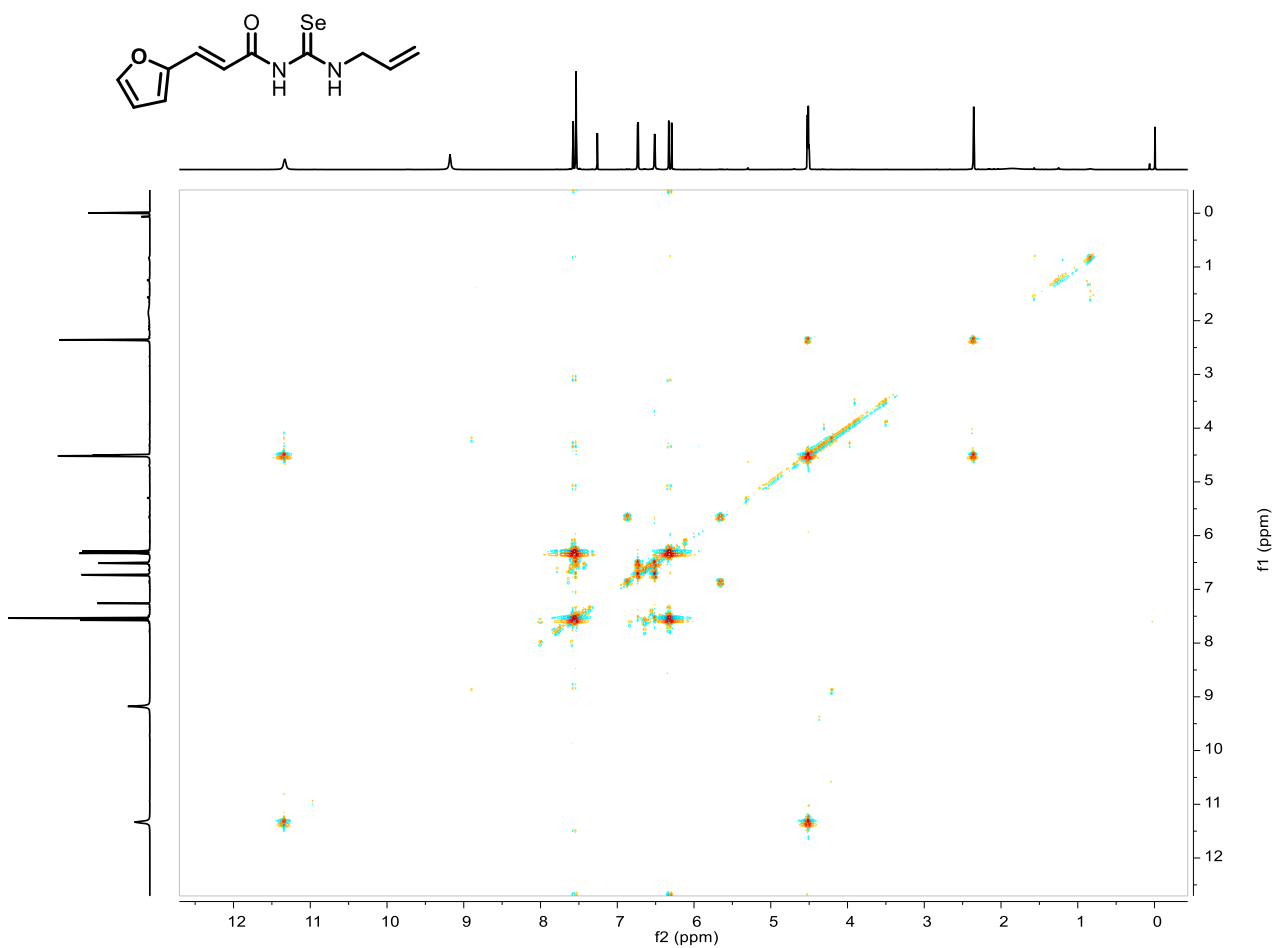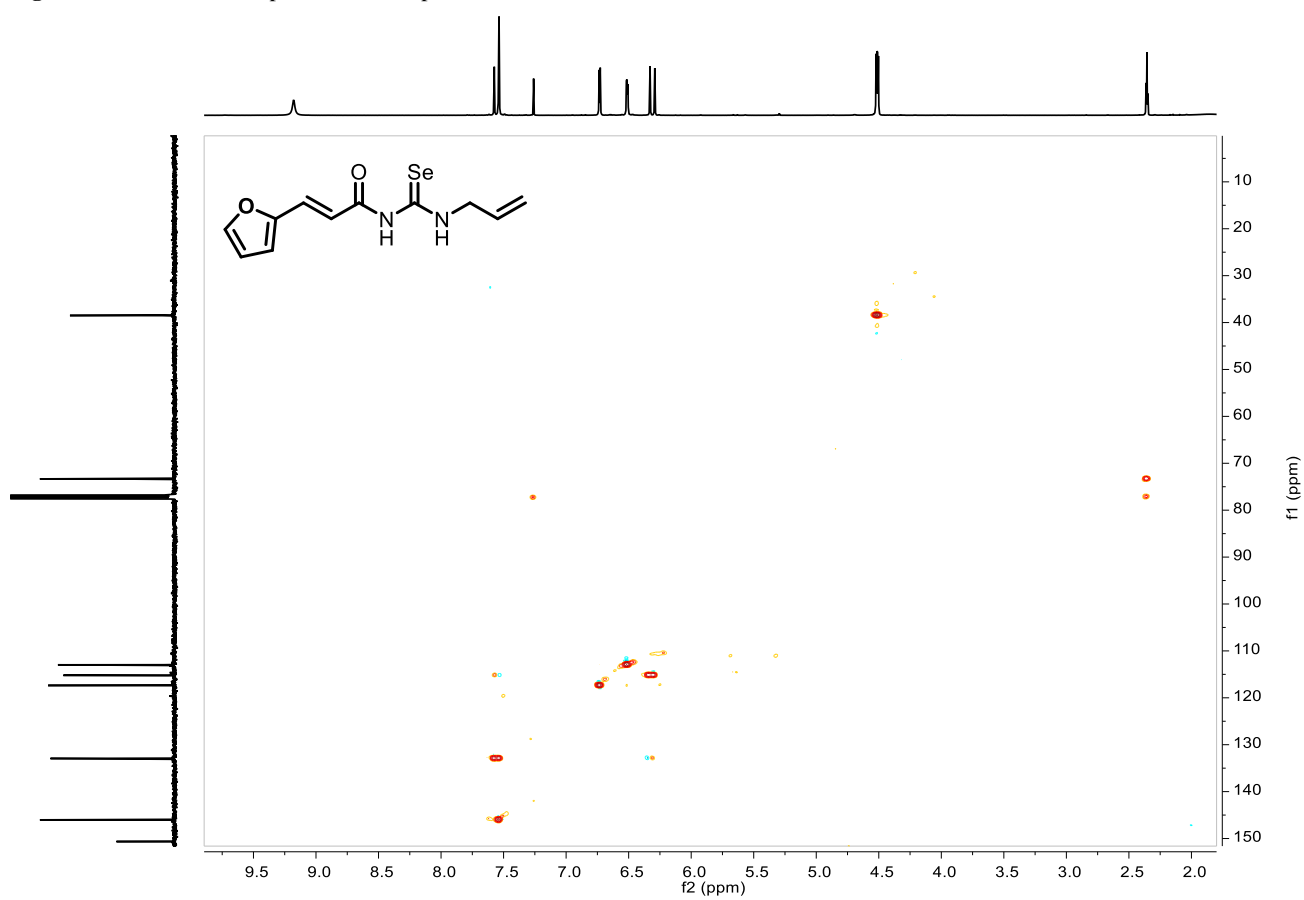

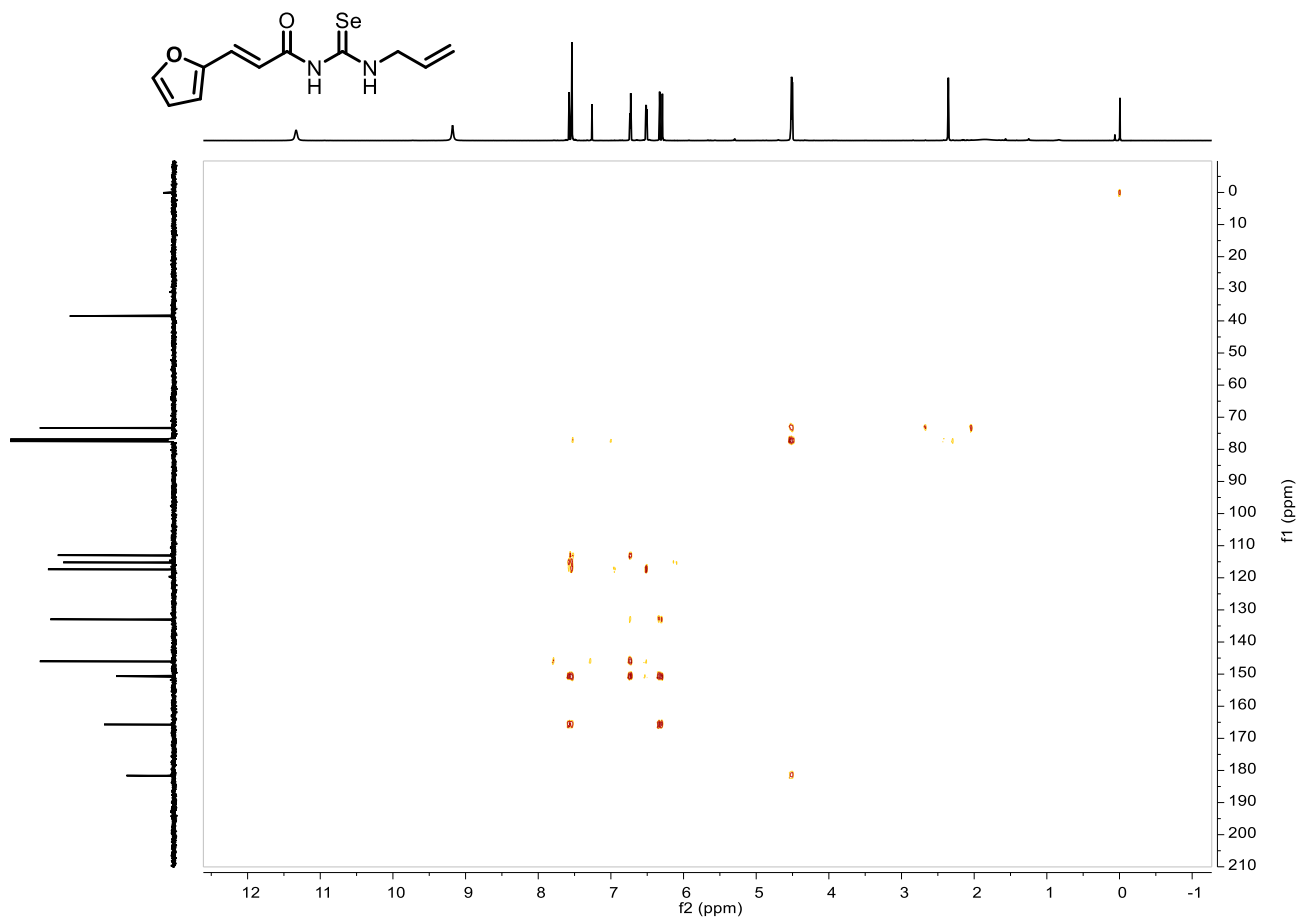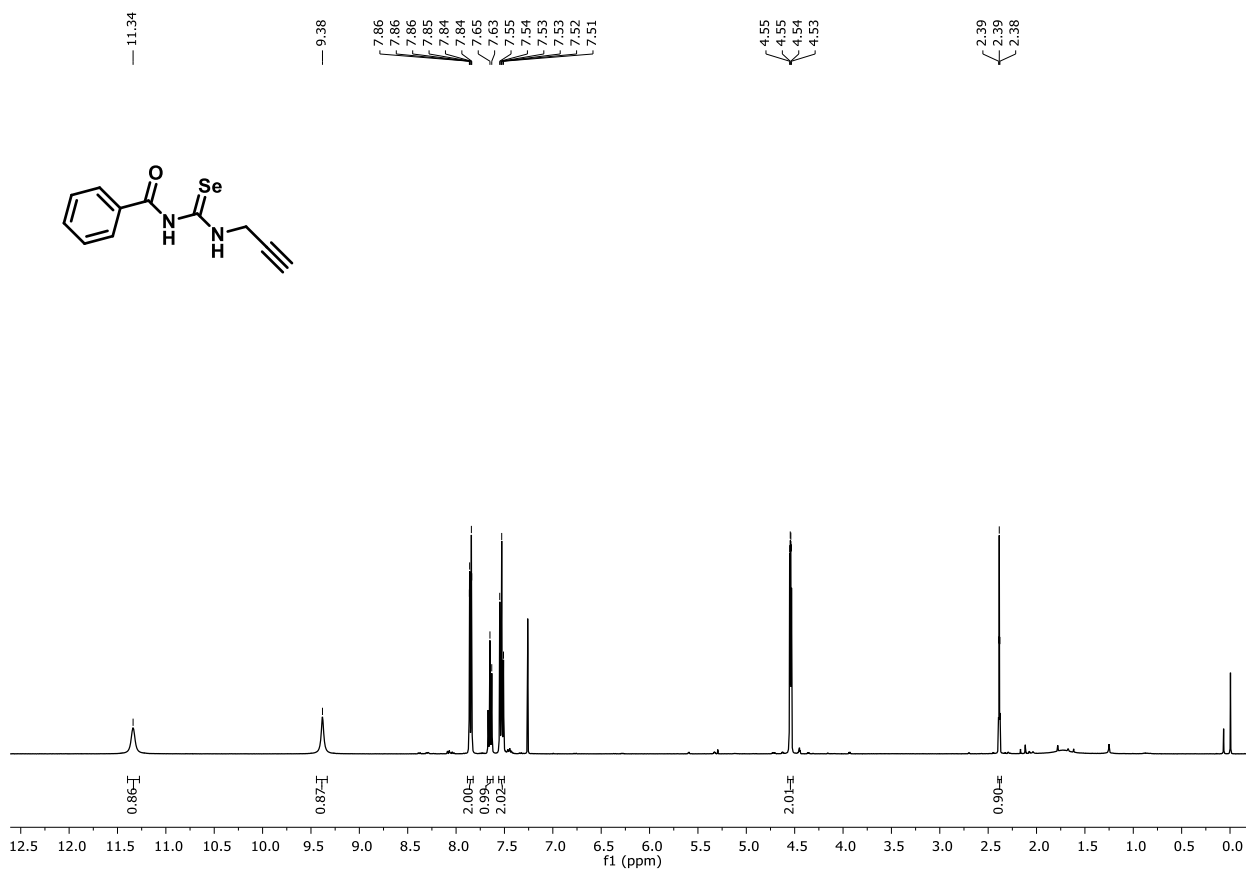

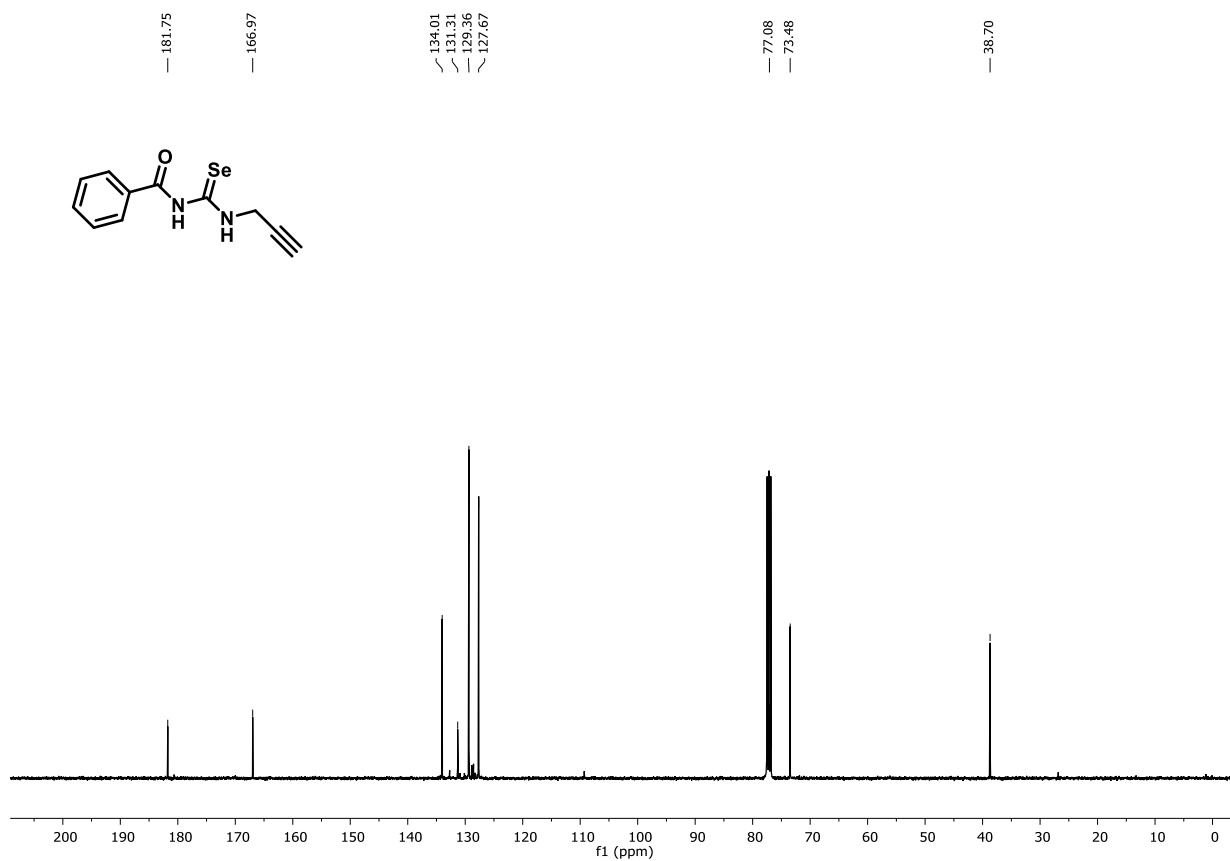

Figure S93. <sup>13</sup>C-NMR spectrum of compound **5.III**.

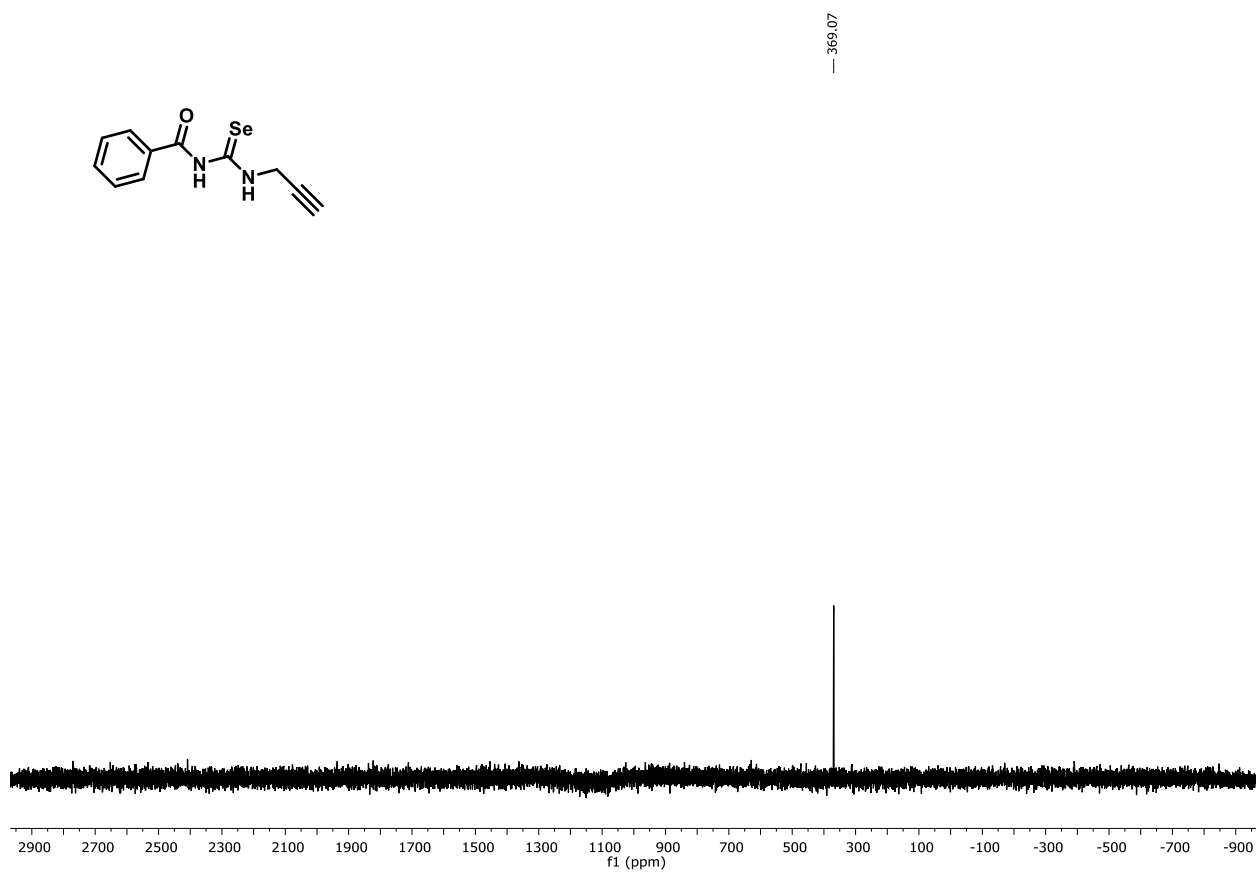

Figure S94. <sup>77</sup>Se-NMR spectrum of compound **5.III**.

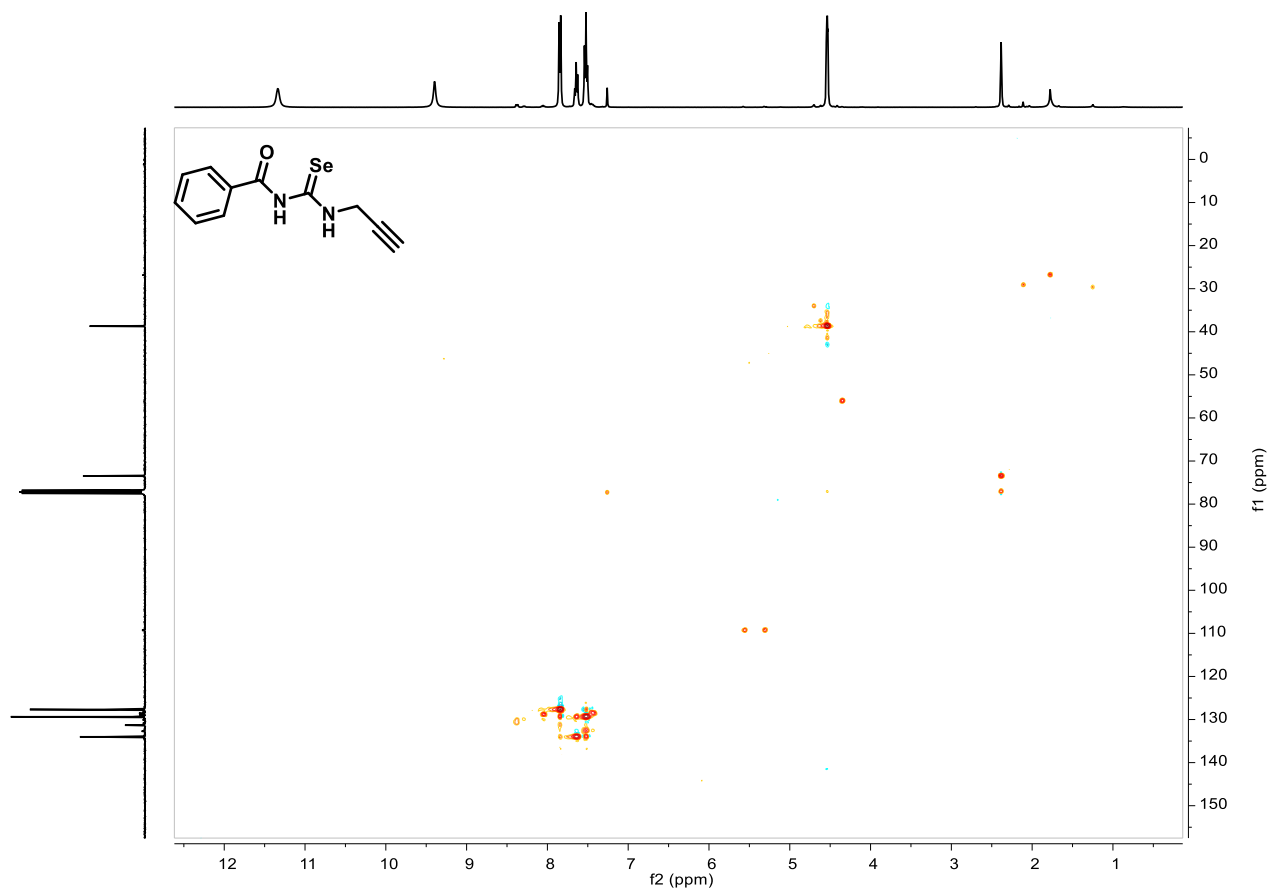

Figure S95. HSQC-NMR spectrum of compound **5.III**.

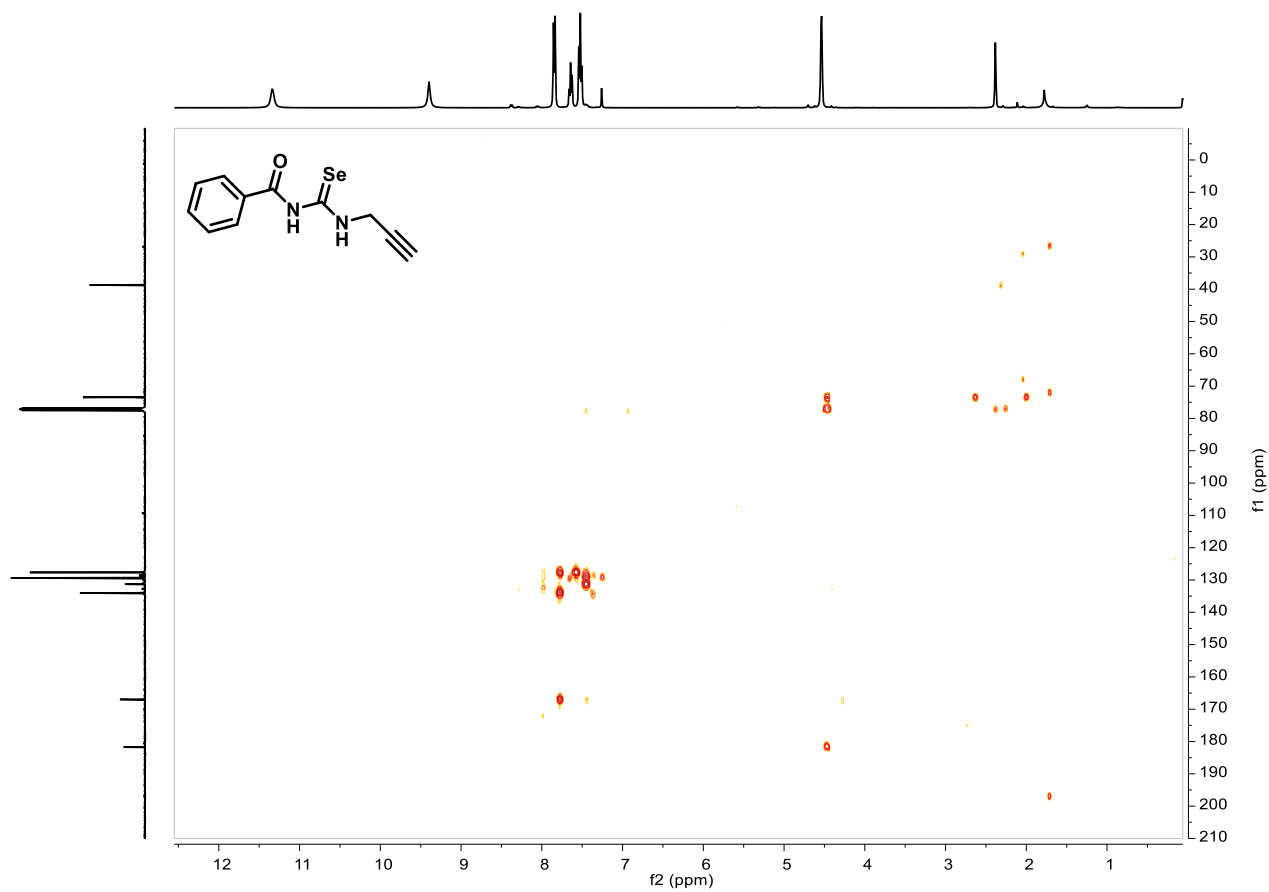

Figure S96. HMBC-NMR spectrum of compound **5.III**.



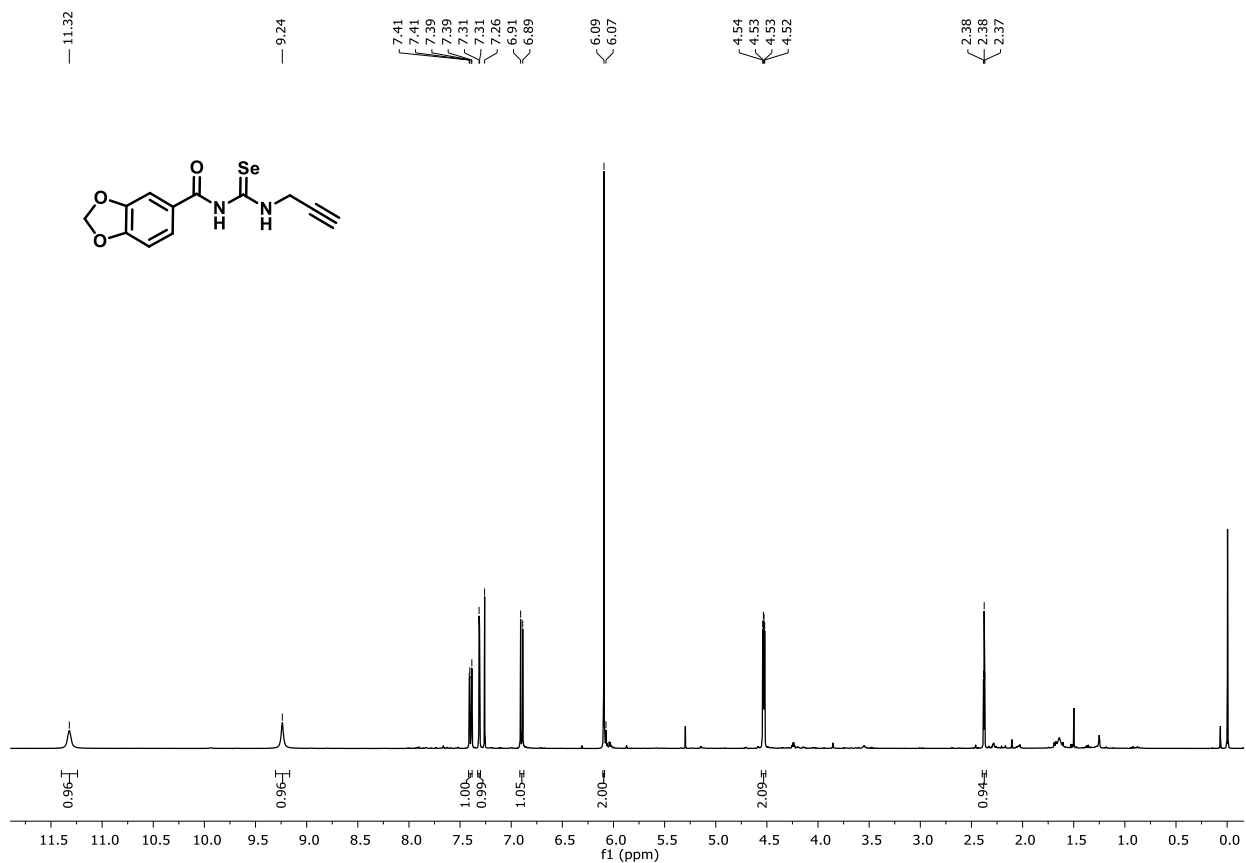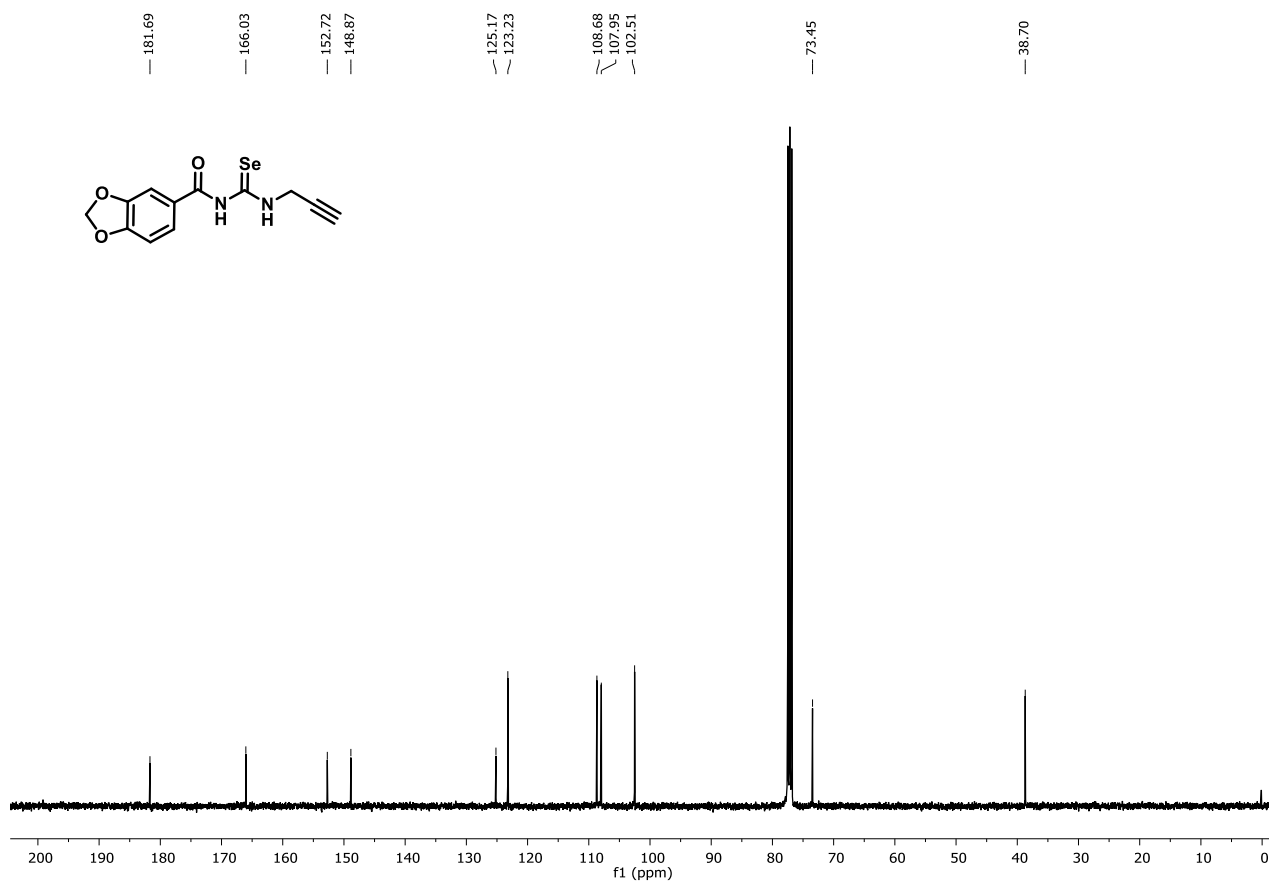

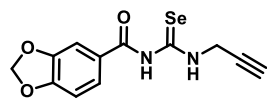

— 363.04

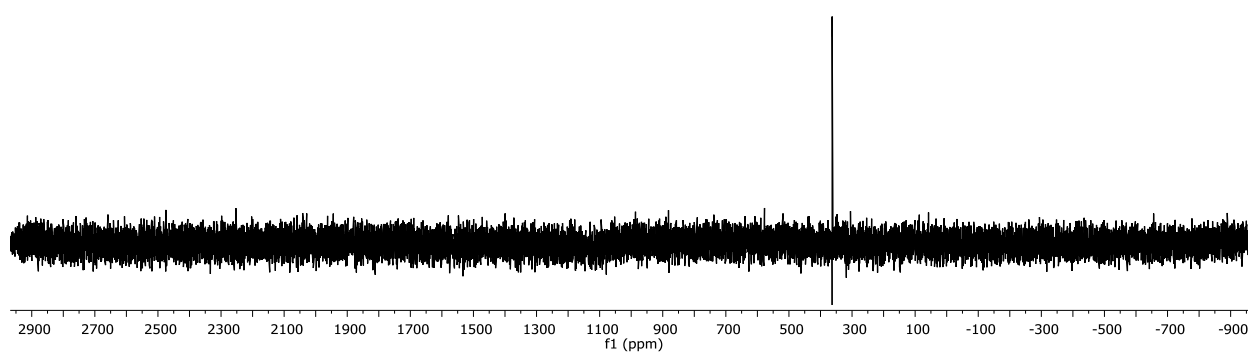

**Figure S99.**  $^{77}\text{Se}$ -NMR spectrum of compound **8.III**.

**DPPH inhibitory activity at 0.003 mg/mL**

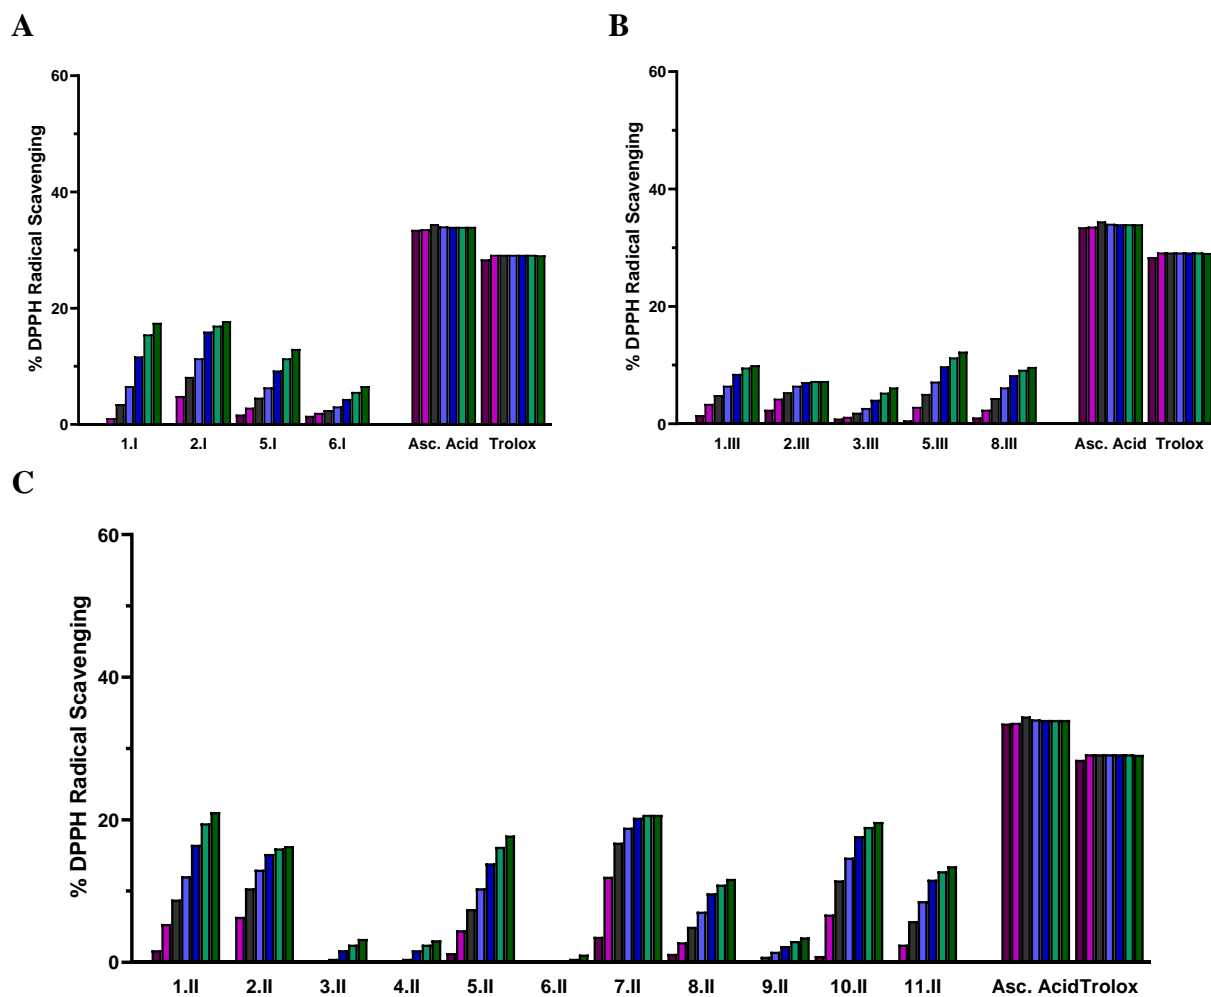

**Figure S100.** 2,2-diphenyl-1-picrylhydrazyl (DPPH) radical scavenging activity of the novel compounds at 0.003 mg/mL recorded at different points: 0 min (purple), 5 min (pink), 15 min (grey), 30 min (light blue), 60 min (dark blue), 90 min (light green), and 120 min (dark green). (A) Percentage of DPPH<sup>•</sup> scavenging of compounds from series **I** (propyl); (B) percentage of DPPH<sup>•</sup> scavenging of compounds from series **III** (propargyl); (C) percentage of DPPH<sup>•</sup> scavenging of compounds from series **II** (allyl).
